# Supplementary material for: C1–C2-linker substituted 1,5-naphthyridine analogues of oxabicyclooctane-linked NBTIs as broad-spectrum antibacterial agents (part 7)
Source: Royal Society of Chemistry journal article supplement (doi:10.1039/c5md00297d), 2015-01-01
Supplement: c5md00297d1.pdf [file c5md00297d1.pdf]

## Electronic Supplementary Information

### Structure activity relationship of C1-C2-linker substituted 1,5-naphthyridine analogs of oxabicyclooctane-linked novel bacterial topoisomerase inhibitors as broad-spectrum antibacterial agents (Part-7)

Sheo B. Singh,<sup>a,\*</sup> David E. Kaelin,<sup>a</sup> Jin Wu,<sup>a</sup> Lynn Miesel,<sup>a</sup> Christopher M. Tan,<sup>a</sup> Peter T. Meinke,<sup>a</sup> David B. Olsen,<sup>b</sup> Armando Lagrutta,<sup>b</sup> Changqing Wei,<sup>c</sup> Yonggang Liao,<sup>c</sup> Xuanjia Peng,<sup>c</sup> Xiu Wang,<sup>c</sup> Hideyuki Fukuda,<sup>d</sup> Ryuta Kishii,<sup>d</sup> Masaya Takei,<sup>d</sup> Takeshi Shibata,<sup>d</sup> Tomoko Takeuchi,<sup>d</sup> Kohei Ohata,<sup>d</sup> Akinori Nishimura<sup>d</sup>, and Yasumichi Fukuda<sup>d,\*</sup>

<sup>a.</sup> Merck Research Laboratories, Kenilworth, NJ 07033.

<sup>b.</sup> Merck Research Laboratories, West Point, PA 19486.

<sup>c.</sup> WuXi AppTec, Shanghai, People's Republic of China.

<sup>d.</sup> Kyorin Pharmaceutical Co., Ltd., 2399-1, Nogi, Nogi-machi, Shimotsuga-gun, Tochigi, 329-0114 Japan.

#### Synthesis of compound **5** (Scheme 1)

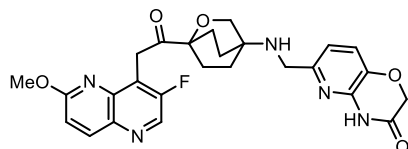

To a solution of tert-butyl 1-(2-(3-fluoro-6-methoxy-1,5-naphthyridin-4-yl)-1-hydroxyethyl)-2-oxabicyclo[2.2.2]octan-4-ylcarbamate (+)-**26** (300 mg) in dichloromethane (6.7 mL) was added Dess-Martin periodinane (313 mg) at room temperature, the mixture was stirred at the same temperature for 18 h. The mixture was washed with saturated sodium hydrogen carbonate solution, saturated sodium sulfite solution and brine. The organic extracts were dried over anhydrous sodium sulfate, filtered, and then concentrated in vacuo. Flash chromatography (silica, toluene : ethyl acetate = 2:1) of the residue gave **27** (264 mg). <sup>1</sup>H NMR (CDCl<sub>3</sub>): δ<sub>H</sub> 1.83–1.90 (m, 2H), 1.99–2.10 (m, 2H), 2.11–2.24 (m, 4H), 4.01 (s, 3H), 4.15 (s, 2H), 4.35 (brs, 1H), 4.54 (s, 2H), 7.05 (d, *J* = 8.6 Hz, 1H), 8.17 (d, *J* = 8.6 Hz, 1H), 8.65 (s, 1H). MS (ESI<sup>+</sup>) *m/z*: 446 (MH<sup>+</sup>). HRMS (ESI<sup>+</sup>) for C<sub>23</sub>H<sub>29</sub>FN<sub>3</sub>O<sub>5</sub> (MH<sup>+</sup>): calcd, 446.20912; found, 446.20918.

To a solution of **27** (30.0 mg) in dichloromethane (0.306 mL) was added trifluoroacetic acid (0.30 mL) at 0 °C, the mixture was stirred at the same temperature for 1 hr and then concentrated in vacuo. After dilution of the residue with water, the mixture was adjusted to pH 11 by adding 1 N sodium hydroxide solution. The aqueous mixture was extracted with dichloromethane/methanol (10:1). The organic extracts were washed with 1 N sodium hydroxide solution and brine, dried over anhydrous sodium sulfate, filtered,

and then concentrated in vacuo to give **28** (23.2 mg).  $^1\text{H}$  NMR ( $\text{CDCl}_3$ ):  $\delta_{\text{H}}$  1.22 (brs, 2H), 1.66–1.84 (m, 4H), 1.98–2.18 (m, 4H), 3.81 (s, 2H), 3.99 (s, 3H), 4.55 (s, 2H), 7.05 (d,  $J = 9.2$  Hz, 1H), 8.18 (d,  $J = 9.2$  Hz, 1H), 8.65 (s, 1H). MS ( $\text{ESI}^+$ )  $m/z$ : 346 ( $\text{MH}^+$ ). HRMS ( $\text{ESI}^+$ ) for  $\text{C}_{18}\text{H}_{21}\text{FN}_3\text{O}_3$  ( $\text{MH}^+$ ): calcd, 346.15669; found, 346.15730.

A mixture of **28** (20.0 mg), **29** (10.8 mg) and acetic acid (66  $\mu\text{L}$ ) in dimethylformamide (0.46 mL) was stirred at room temperature for 30 minute. Sodium triacetoxyborohydride (17.2 mg) was added to the mixture at 0  $^\circ\text{C}$ , the mixture was stirred at room temperature for overnight. After dilution of the mixture with sodium carbonate solution, the mixture was extracted with dichloromethane. The organic extracts were washed with brine, dried over anhydrous sodium sulfate, filtered, and then concentrated in vacuo. Flash chromatography (silica, chloroform: methanol = 10:1) of the residue gave **5** (28.3 mg). mp 183–184  $^\circ\text{C}$ ,  $^1\text{H}$  NMR ( $\text{DMSO}-d_6$ ):  $\delta_{\text{H}}$  1.65–1.82 (m, 4H), 1.84–1.95 (m, 2H), 1.98–2.09 (m, 3H), 3.65 (d,  $J = 6.1$  Hz, 2H), 3.79 (s, 2H), 3.96 (s, 3H), 4.50 (s, 2H), 4.59 (s, 2H), 7.02 (d,  $J = 8.0$  Hz, 1H), 7.23 (d,  $J = 9.2$  Hz, 1H), 7.29 (d,  $J = 8.0$  Hz, 1H), 8.29 (d,  $J = 9.2$  Hz, 1H), 8.81 (s, 1H), 11.16 (s, 1H). MS ( $\text{ESI}^+$ )  $m/z$ : 508 ( $\text{MH}^+$ ). HRMS ( $\text{ESI}^+$ ) for  $\text{C}_{26}\text{H}_{27}\text{FN}_5\text{O}_5$  ( $\text{MH}^+$ ): calcd, 508.19962; found, 508.19896.

Anal. calcd for  $\text{C}_{26}\text{H}_{26}\text{FN}_5\text{O}_5 \cdot 1.2\text{H}_2\text{O}$ , C 59.02, H 5.41, N 13.24%. Found: C 59.15, H 5.13, N 12.91%.

### Synthesis of compounds **13** and **14** (Scheme 1)

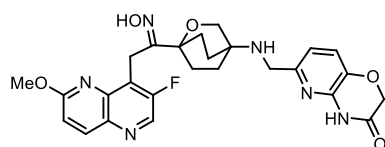

A mixture of **5** (65.0 mg) and hydroxylamine hydrochloride (35.6 mg) in pyridine (7.4 mL) was heated at 80  $^\circ\text{C}$  for 51 h and then concentrated in vacuo. After dilution of the residue with dichloromethane, the mixture was washed with water and brine, dried over anhydrous sodium sulfate, filtered, and then concentrated in vacuo. Preparative thin layer chromatography (silica, chloroform : methanol = 10:1) of the residue gave **13** (17.4 mg, 33%) and **14** (31.1 mg, 58%). **13**: mp 191  $^\circ\text{C}$ ,  $^1\text{H}$  NMR ( $\text{DMSO}-d_6$ ):  $\delta_{\text{H}}$  1.55–2.13 (m, 7H), 2.59–2.71 (m, 2H), 3.64 (s, 2H), 3.71 (s, 2H), 3.99 (s, 3H), 4.07 (s, 2H), 4.59 (s, 2H), 7.01 (d,  $J = 8.0$  Hz, 1H), 7.20 (d,  $J = 9.2$  Hz, 1H), 7.28 (d,  $J = 8.0$  Hz, 1H), 8.24 (d,  $J = 8.6$  Hz, 1H), 8.73 (s, 1H), 10.55 (s, 1H), 11.15 (s, 1H). MS ( $\text{ESI}^+$ )  $m/z$ : 523 ( $\text{MH}^+$ ). HRMS ( $\text{ESI}^+$ ) for  $\text{C}_{26}\text{H}_{28}\text{FN}_6\text{O}_5$  ( $\text{MH}^+$ ): calcd, 523.21052; found, 523.21148. Anal. calcd for  $\text{C}_{26}\text{H}_{27}\text{FN}_6\text{O}_5$ , C 59.76, H 5.21, N 16.08%. Found: C 59.04, H 5.19, N 15.78%. **14**: mp 248  $^\circ\text{C}$ ,  $^1\text{H}$  NMR ( $\text{DMSO}-d_6$ ):  $\delta_{\text{H}}$  1.47–1.58 (m, 2H), 1.61–1.72 (m, 2H), 1.75–1.91 (m, 3H), 1.96–2.09 (m, 2H), 3.36 (s, 2H), 3.55 (d,  $J = 6.1$  Hz, 2H), 4.03 (s, 3H), 4.18 (s, 2H), 4.57 (s, 2H), 6.95 (d,  $J = 8.0$  Hz, 1H), 7.21 (d,  $J = 9.2$  Hz, 1H), 7.25 (d,  $J = 8.0$  Hz, 1H), 8.25 (d,  $J = 9.2$  Hz, 1H), 8.66 (s, 1H), 10.75 (s, 1H), 11.12 (s, 1H). MS ( $\text{ESI}^+$ )  $m/z$ : 523 ( $\text{MH}^+$ ). HRMS ( $\text{ESI}^+$ ) for  $\text{C}_{26}\text{H}_{28}\text{FN}_6\text{O}_5$  ( $\text{MH}^+$ ): calcd, 523.21052; found, 523.21114. Anal. Calcd for  $\text{C}_{26}\text{H}_{27}\text{FN}_6\text{O}_5$ , C 59.76, H 5.21, N 16.08%. Found: C 59.20, H 5.26, N 15.70%.

### Synthesis of compound **15** (Scheme 1)

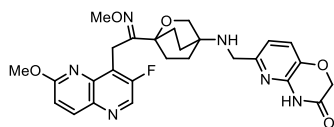

A mixture of **5** (150 mg) and *O*-methylhydroxylamine hydrochloride (98.7 mg) in pyridine (7.4 mL) was heated at 80 °C for 51 h and then concentrated in vacuo. After dilution of the residue with dichloromethane, the mixture was washed with water and brine, dried over anhydrous sodium sulfate, filtered, and then concentrated in vacuo. Preparative thin layer chromatography (silica, chloroform: methanol = 10:1) of the residue gave **15** (65.3 mg, 52%). <sup>1</sup>H NMR (DMSO-*d*<sub>6</sub>): δ<sub>H</sub> 1.46–1.56 (m, 2H), 1.60–1.72 (m, 2H), 1.76–1.91 (m, 3H), 1.92–2.02 (m, 2H), 3.35 (s, 2H), 3.54 (d, *J* = 4.9 Hz, 2H), 3.63 (s, 3H), 4.02 (s, 3H), 4.16 (s, 2H), 4.57 (s, 2H), 6.95 (d, *J* = 8.0 Hz, 1H), 7.22 (d, *J* = 8.6 Hz, 1H), 7.24 (d, *J* = 8.6 Hz, 1H), 8.26 (d, *J* = 9.2 Hz, 1H), 8.69 (d, *J* = 1.2 Hz, 1H), 11.13 (s, 1H). MS (ESI<sup>+</sup>) *m/z*: 537 (MH<sup>+</sup>). HRMS (ESI<sup>+</sup>) for C<sub>27</sub>H<sub>30</sub>FN<sub>6</sub>O<sub>5</sub> (MH<sup>+</sup>): calcd, 537.22617; found, 537.22663. Anal. Calcd for C<sub>27</sub>H<sub>29</sub>FN<sub>6</sub>O<sub>5</sub>, C 60.44, H 5.45, N 15.66%. Found: C 60.29, H 5.44, N 15.73%.

### Synthesis of compound (-)-**6** (Scheme 2)

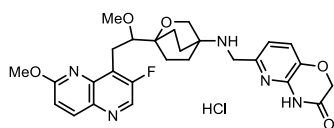

To a suspension of sodium hydride (42.9 mg, 55% in mineral oil) in *N,N*-dimethylformamide (3.5 mL) was added a solution of tert-butyl 1-(2-(3-fluoro-6-methoxy-1,5-naphthyridin-4-yl)-1-hydroxyethyl)-2-oxabicyclo[2.2.2]octan-4-ylcarbamate (-)-**26** (200 mg) in *N,N*-dimethylformamide (0.6 mL) at -40 °C, the mixture was stirred at -20 °C for 2 h. Methyl benzenesulfonate (66.7 mL) was added to the mixture. The mixture was stirred under cooling with ice for 2.5 h. After dilution of the mixture with water, the mixture was extracted with ethyl acetate. The organic extracts were washed with brine, dried over anhydrous sodium sulfate, filtered, and then concentrated in vacuo. Preparative thin layer chromatography (silica, toluene: methanol = 7:1) of the residue gave **30** (125 mg). <sup>1</sup>H NMR (CDCl<sub>3</sub>): δ<sub>H</sub> 1.42 (s, 9H), 1.78–1.94 (m, 4H), 1.97–2.23 (m, 4H), 3.08 (s, 3H), 3.28 (dd, *J* = 12.7, 3.6 Hz, 1H), 3.42 (ddd, *J* = 12.7, 4.2, 1.8 Hz, 1H), 3.61 (dd, *J* = 9.1, 3.6 Hz, 1H), 3.86–3.94 (m, 2H), 4.09 (s, 3H), 4.28 (brs, 1H), 7.07 (d, *J* = 9.1 Hz, 1H), 8.17 (d, *J* = 9.1 Hz, 1H), 8.62 (s, 1H). MS (ESI<sup>+</sup>) *m/z*: 462 (MH<sup>+</sup>). HRMS (ESI<sup>+</sup>) for C<sub>24</sub>H<sub>33</sub>FN<sub>3</sub>O<sub>5</sub> (MH<sup>+</sup>): calcd, 462.24042; found, 462.23972.

To a solution of **30** (80.0 mg) in dichloromethane (0.79 mL) was added trifluoroacetic acid (0.77 mL) at 0 °C, the mixture was stirred at the same temperature for 30 minutes and then concentrated in vacuo. After dilution of the residue with water, the mixture was adjusted to pH 11 by adding 1 N sodium

hydroxide solution. The aqueous mixture was extracted with dichloromethane/methanol (10:1). The organic extracts were washed with 1 N sodium hydroxide solution and brine, dried over anhydrous sodium sulfate, filtered, and then concentrated in vacuo to give deprotected amine (52.2 mg).  $^1\text{H}$  NMR ( $\text{CDCl}_3$ ):  $\delta_{\text{H}}$  1.60–1.93 (m, 6H), 1.98–2.06 (m, 1H), 2.13–2.22 (m, 1H), 3.07 (s, 3H), 3.29 (dd,  $J = 12.7, 9.1$  Hz, 1H), 3.42 (ddd,  $J = 12.7, 4.2, 1.8$  Hz, 1H), 3.57 (s, 2H), 3.61 (dd,  $J = 9.1, 4.2$  Hz, 1H), 4.09 (s, 3H), 7.07 (d,  $J = 9.1$  Hz, 1H), 8.18 (d,  $J = 9.1$  Hz, 1H), 8.62 (s, 1H). MS ( $\text{ESI}^+$ )  $m/z$ : 362 ( $\text{MH}^+$ ). HRMS ( $\text{ESI}^+$ ) for  $\text{C}_{19}\text{H}_{25}\text{FN}_3\text{O}_3$  ( $\text{MH}^+$ ): calcd, 362.18799; found, 362.18769.

A mixture of the aforementioned amine (50.0 mg), **29** (25.9 mg) and acetic acid (158  $\mu\text{L}$ ) in dimethylformamide (1.1 mL) was stirred at room temperature for 30 minutes. Sodium triacetoxyborohydride (41.0 mg) was added to the mixture at 0  $^\circ\text{C}$ , the mixture was stirred at room temperature for overnight. After dilution of the mixture with sodium carbonate solution, the mixture was extracted with dichloromethane. The organic extracts were washed with brine, dried over anhydrous sodium sulfate, filtered, and then concentrated in vacuo. Flash chromatography (silica, chloroform: methanol = 10:1) of the residue gave (-)-**6** (55.7 mg). mp 219–220  $^\circ\text{C}$ ,  $^1\text{H}$  NMR ( $\text{DMSO}-d_6$ ):  $\delta_{\text{H}}$  1.55–1.92 (m, 8H), 1.95–2.07 (m, 1H), 2.94 (s, 3H), 3.15 (dd,  $J = 12.2, 9.2$  Hz, 1H), 3.29–3.38 (m, 1H), 3.50 (s, 2H), 3.55 (dd,  $J = 9.2, 4.3$  Hz, 1H), 3.60 (s, 2H), 4.04 (s, 3H), 4.58 (s, 2H), 6.99 (d,  $J = 7.9$  Hz, 1H), 7.23 (d,  $J = 9.2$  Hz, 1H), 7.27 (d,  $J = 7.9$  Hz, 1H), 8.27 (d,  $J = 9.2$  Hz, 1H), 8.75 (s, 1H), 11.15 (s, 1H). MS ( $\text{ESI}^+$ )  $m/z$ : 524 ( $\text{MH}^+$ ). HRMS ( $\text{ESI}^+$ ) for  $\text{C}_{27}\text{H}_{31}\text{FN}_5\text{O}_5$  ( $\text{MH}^+$ ): calcd, 524.23092; found, 524.23153. Anal. Calcd for  $\text{C}_{27}\text{H}_{30}\text{FN}_5\text{O}_5 \cdot \text{HCl} \cdot 0.6\text{H}_2\text{O}$ , C 56.81, H 5.69, N 12.27%. Found: C 56.55, H 5.50, N 12.18%.

### Synthesis of compound ((±)-**7**) (Scheme 2)

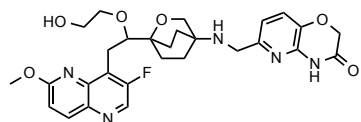

To a cooled (0  $^\circ\text{C}$ ) solution of (±)-**26** (250 mg, 0.56 mmol, 1.0 eq) in dried THF (25 mL) was added NaH (89 mg, 60% in mineral, 2.24 mmol, 4.0 eq) portion wise. Then the mixture was stirred at the same temperature for 30 min, and ethyl bromoacetate (93 mg, 0.56 mmol, 1.0 eq) were added. The resulting mixture was stirred at room temperature overnight, and partitioned between water and EtOAc. The organic layers were washed by brine, dried over sodium sulfate and concentrated. The residue was purified by preparative TLC to give **31a** (52 mg, 17.4 %). MS ( $\text{ESI}^+$ )  $m/z$  534 ( $\text{M}+\text{H}^+$ ).

A solution of **31a** (52 mg, 0.10 mmol, 1.0 eq) in dried THF (20 mL) was added  $\text{LiBH}_4$  (9 mg, 0.39 mmol, 4.0 eq), and the resulting mixture was stirred at room temperature for 30 min. The residue was concentrated under reduced pressure and partitioned between water and EtOAc. The organic layers were washed with brine, dried over sodium sulfate and concentrated to give the primary alcohol (40 mg, 83.3 %). MS ( $\text{ESI}^+$ )  $m/z$  492 ( $\text{M}+\text{H}^+$ ).



A solution of the primary alcohol (40 mg, 0.08 mmol) in dichloromethane (5 mL) was added TFA (5 mL) and the mixture was stirred at room temperature for 1h and then concentrated under reduced pressure. The residue was basified by aqueous solution of sodium carbonate (pH = 8 ~ 9) and extracted with EtOAc. The organic layers were washed by brine, dried over sodium sulfate, concentrated to give free amine (25 mg, 78.1 %). MS (ESI)<sup>+</sup> *m/z* 392 (M+H)<sup>+</sup>.

A solution of the free amine (25 mg, 0.06 mmol, 1.0 eq) and aldehyde **29** (23 mg, 0.13 mmol, 2.0 eq) in DMF:AcOH = 7:1 (5 mL) was stirred at room temperature for 30 min and then NaBH(OAc)<sub>3</sub> (39 mg, 0.19 mmol, 3.0 eq) was added. The mixture was stirred at room temperature for 1h, and purified by preparative HPLC to give (±)-**7** (11 mg, 31.4 %). <sup>1</sup>H-NMR (CD<sub>3</sub>OD, 400 MHz) δ<sub>H</sub> 8.64 (s, 1H), 8.18 ~ 8.20 (d, *J* = 9.39 Hz, 1H), 7.33 ~ 7.35 (d, *J* = 7.83 Hz, 1H), 7.15 ~ 7.17 (d, *J* = 9.39 Hz, 1H), 7.07 ~ 7.09 (d, *J* = 7.83 Hz, 1H), 4.67 (s, 2H), 4.19 (s, 2H), 4.09 (s, 3H), 3.84 ~ 3.89 (m, 3H), 3.35 ~ 3.47 (m, 2H), 3.03 ~ 3.08 (m, 1H), 2.03 ~ 2.31 (m, 8H). MS (ESI)<sup>+</sup> *m/z* 554 (MH)<sup>+</sup>.

#### Synthesis of compound (±)-**8** (Scheme 2)

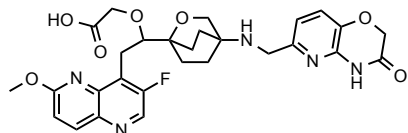

To a cooled (0 °C) solution of (±)-**26** (150 mg, 0.34 mmol, 1.0 eq) in dried THF (15 mL) was added NaH (54 mg, 60 % in mineral, 1.36 mmol, 4.0 eq) portion wise, and stirred at the same temperature for 30 min. Then 2-bromo-*tert*-butyl-acetate (65 mg, 0.34 mmol, 1.0 eq) was added and the resulting mixture was stirred at room temperature overnight. Partitioned between water and EtOAc, the organic layers were washed with brine, dried over sodium sulfate, concentrated, and purified by preparative TLC to give compound alkylated ester **31b** (120 mg, 63.8 %). MS (ESI)<sup>+</sup> *m/z* 562 (MH)<sup>+</sup>.

A solution of the ester (120 mg, 0.21 mmol, 1.0 eq) in dichloromethane (5 mL) was added TFA (5 mL), stirred at room temperature for 30 min and concentrated. The residue was treated by saturated aqueous sodium carbonate solution to pH = 8 ~ 9, and then by diluted by aqueous HCl until pH reached 6. The reaction mixture was extracted with EtOAc, the organic layers were washed with brine, dried over sodium sulfate and concentrated to give deprotected free amine (75 mg, 86.2 %), which was used for the next step directly.

A solution of the free amine (75 mg, 0.19mmol, 1.0 eq) and aldehyde **29** (66 mg, 0.37 mmol, 2.0 eq) in DMF: AcOH = 7:1 (5 mL) was stirred at room temperature for 30 min and then NaBH(OAc)<sub>3</sub> (118 mg, 0.57 mmol, 3.0 eq) was added. The mixture was stirred at room temperature for 1h, and purified by preparative HPLC to give (±)-**8** (27 mg, 25.7 %). <sup>1</sup>H-NMR (CD<sub>3</sub>OD, 400 MHz,) δ<sub>H</sub> 8.61 (s, 1H), 8.18 ~ 8.20 (d, *J* = 9.39 Hz, 1H), 7.34 ~ 7.36 (d, *J* = 7.83 Hz, 1H), 7.15 ~ 7.17 (d, *J* = 8.61 Hz, 1H), 7.06 ~ 7.08 (d, *J* = 8.61 Hz, 1H), 4.68 (s, 2H), 4.19 (s, 2H), 4.09 (s, 3H), 4.00 ~ 4.06 (m, 2H), 3.84 ~ 3.89 (m, 3H), 3.33 ~

3.44 (m, 2H), 2.01 ~ 2.30 (m, 8H). MS (ESI)<sup>+</sup> *m/z* 568 (MH)<sup>+</sup>.

### Synthesis of compound (±)-9 (Scheme 3)

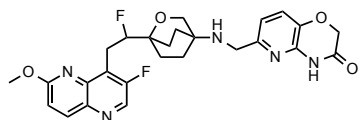

A mixture of (±)-**26** (0.1 g, 0.223 mmol) in anhydrous dichloromethane (6 mL) was added DAST (36 mg, 0.223 mmol) drop wise at -78 °C. The reaction was stirred overnight at room temperature and then diluted with 20 mL of dichloromethane, washed with saturated Na<sub>2</sub>CO<sub>3</sub> and brine and was concentrated to dryness. The residue was purified by preparative TLC (25 % EtOAc in petroleum ether) to give pure **32** (0.06 g, yield 60 %). MS (ESI)<sup>+</sup> *m/z* 450 (MH)<sup>+</sup>.

To a solution of **32** (0.06 g, 0.134mmol) in dichloromethane (2 mL) was added TFA (2 mL) and the mixture was stirred at room temperature for 30 min and concentrated under reduced pressure. After dilution of the residue with water, the mixture was washed with methyl tert-butyl ether twice. The aqueous layer was adjusted to pH 13 by addition of aqueous Na<sub>2</sub>CO<sub>3</sub> solution and extract twice with EtOAc. The combined EtOAc layer was washed with brine, dried over anhydrous Na<sub>2</sub>SO<sub>4</sub> and concentrated to give free amine. MS (ESI)<sup>+</sup> *m/z* 350 (MH)<sup>+</sup>.

A mixture of just prepared free amine (30 mg, 0.086mmol) and the aldehyde **29** (23 mg, 0.129 mmol) in anhydrous DMF (3.5 mL) was added acetic acid (0.5 mL) and stirred at room temperature for 30 min. The resulting solution was added three times of sodium triacetoxyborohydride (36 mg, 0.172 mmol) and stirred at room temperature for overnight. The mixture was concentrated under reduced pressure. After dilution of the residue with dichloromethane, the mixture was washed with saturated sodium carbonate solution, water and brine. The organic extracts were dried over anhydrous Na<sub>2</sub>SO<sub>4</sub> then concentrated under reduced pressure. The residue was purified by preparative TLC (dichloromethane/methanol = 10: 1) to give a solid. To a solution of this solid (10 mg, 0.02 mmol) in dichloromethane (2 mL) and ethanol (0.5 mL) was added a solution of hydrogen chloride (5 uL, 0.02 mmol, 4 M in dioxane) under cooling with ice, the mixture was stirred at room temperature for 2 h and concentrated under reduced pressure. Treatment of the residue with ethanol gave (±)-**9**.HCl. <sup>1</sup>H-NMR (400 MHz, CD<sub>3</sub>OD) δ<sub>H</sub> 8.94 (s, 1 H), 8.31 (d, *J* = 8.4 Hz, 1H), 7.34-7.36 (m, 2H), 7.12 (d, *J* = 7.2 Hz, 1H), 4.68 (s, 2 H), 4.05-4.36 (m, 8 H), 3.62-3.66 (m, 1 H), 3.44-3.51 (m, 1 H), 2.71-2.77 (m, 1 H), 2.46-2.53 (m, 1 H), 1.97-2.31 (m, 6 H). MS (ESI)<sup>+</sup> *m/z* 511(MH)<sup>+</sup>.

### Synthesis of (+)-10 and (-)-10 (Scheme 4)

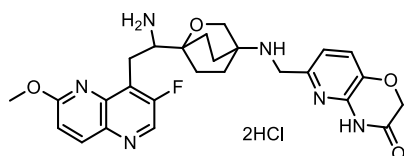

A mixture of **27** (40.0 mg), ammonium acetate (173.0 mg) and sodium cyanoborohydride (81.75 mg) in methanol (640 mL) and dichloromethane (260 mL) was stirred at room temperature for 6 days and then concentrated in vacuo. After dilution of the residue with dichloromethane, the mixture was washed with saturated sodium hydrogencarbonate solution and brine. The organic extracts were dried over anhydrous sodium sulfate, filtered, and then concentrated in vacuo. Preparative thin layer chromatography (silica, dichloromethane : methanol = 10:1) of the residue gave **33** (26.0 mg, 65%).  $^1\text{H}$  NMR ( $\text{DMSO-}d_6$ ):  $\delta_{\text{H}}$  1.36 (s, 9H), 1.74–2.00 (m, 8H), 2.83–2.96 (m, 2H), 3.30 (s, 3H), 3.78 (s, 2H), 4.02 (s, 3H), 6.59 (s, 1H), 7.21 (d,  $J = 8.6$  Hz, 1H), 8.25 (d,  $J = 9.2$  Hz, 1H), 8.73 (s, 1H), MS ( $\text{ESI}^+$ )  $m/z$  447 ( $\text{MH}^+$ ), HRMS ( $\text{ESI}^+$ ) for  $\text{C}_{23}\text{H}_{32}\text{FN}_4\text{O}_4$  ( $\text{MH}^+$ ): calcd, 447.24076; found, 447.24086.

To a suspension of **33** (350 mg) in ethyl acetate (12 mL) and sodium hydrogencarbonate solution (316 mg in 3.7 mL of water) was added benzyl chloroformate (134 mL) under cooling with ice, the mixture was stirred at the same temperature for 10 minutes. After dilution of the mixture with water, the mixture was extracted with ethyl acetate. The organic extracts were washed with brine, dried over anhydrous sodium sulfate, filtered, and then concentrated in vacuo. Treatment of the residue with hexane/ethyl acetate (2:1) gave **34** (398 mg).  $^1\text{H}$  NMR ( $\text{CDCl}_3$ ):  $\delta_{\text{H}}$  1.44 (s, 9H), 1.62–1.71 (m, 1H), 1.73–1.94 (m, 3H), 1.98–2.33 (m, 4H), 3.32 (t,  $J = 12.2$  Hz, 1H), 3.40–3.53 (m, 1H), 3.90–4.03 (m, 3H), 4.07 (s, 3H), 4.23–4.39 (m, 1H), 4.70 (d,  $J = 12.2$  Hz, 1H), 4.76 (d,  $J = 12.8$  Hz, 1H), 4.89 (d,  $J = 10.4$  Hz, 0.2H), 5.24 (d,  $J = 10.4$  Hz, 0.8H), 6.72 (d,  $J = 7.3$  Hz, 0.3H), 6.95–7.01 (m, 1.7H), 7.03 (d,  $J = 9.2$  Hz, 1H), 7.16–7.30 (m, 3H), 8.09 (d,  $J = 9.2$  Hz, 0.1H), 8.14 (d,  $J = 8.6$  Hz, 0.9H), 8.53 (s, 1H). MS ( $\text{ESI}^+$ )  $m/z$  581 ( $\text{MH}^+$ ). HRMS ( $\text{ESI}^+$ ) for  $\text{C}_{29}\text{H}_{32}\text{FN}_4\text{O}_4$  ( $\text{MH}^+$ ): calcd, 581.27754; found, 581.27665. Optical resolution (CHIRALPAK IA, hexane: IPA:MTBE = 85:10:5) of the racemate (380 mg) gave (+)-**34** (183 mg,  $[\alpha]_{\text{D}}^{24} +102.2$  ( $c$  0.3, MeOH)) and (–)-**34** (186 mg,  $[\alpha]_{\text{D}}^{27} -107.7$  ( $c$  0.3, MeOH)).

The title compound (+)-**35** (131 mg) was prepared from (+)-**34** (170 mg) in the same manner as described for the synthesis of **28**. (+)-**35**  $^1\text{H}$  NMR ( $\text{DMSO-}d_6$ ):  $\delta_{\text{H}}$  0.94–1.08 (brs, 2H), 1.46–1.89 (m, 6H), 2.04–2.14 (m, 1H), 2.21–2.31 (m, 1H), 3.26–3.36 (m, 1H), 3.46–3.54 (m, 1H), 3.61–3.71 (m, 2H), 3.97–4.06 (m, 1H), 4.08 (s, 3H), 4.70 (d,  $J = 12.9$  Hz, 1H), 4.76 (d,  $J = 12.2$  Hz, 1H), 5.25 (d,  $J = 9.8$  Hz, 1H), 6.71 (d,  $J = 6.7$  Hz, 0.2H), 6.94–7.02 (m, 1.8H), 7.03 (d,  $J = 9.2$  Hz, 1H), 7.16–7.33 (m, 3H), 8.09 (d,  $J = 9.2$  Hz, 0.2H), 8.14 (d,  $J = 9.2$  Hz, 0.8H), 8.53 (s, 1H), MS ( $\text{ESI}^+$ )  $m/z$  481 ( $\text{MH}^+$ ), HRMS ( $\text{ESI}^+$ ) for  $\text{C}_{26}\text{H}_{30}\text{FN}_4\text{O}_4$  ( $\text{MH}^+$ ): calcd, 481.22511; found, 481.22500.

The title compound (–)-**35** (132 mg) was prepared in the same manner from (–)-**34** (170 mg). (–)-**35**  $^1\text{H}$  NMR ( $\text{DMSO-}d_6$ ):  $\delta_{\text{H}}$  0.93–1.13 (brs, 2H), 1.46–1.88 (m, 6H), 2.05–2.14 (m, 1H), 2.20–2.32 (m, 1H), 3.26–3.36 (m, 1H), 3.46–3.54 (m, 1H), 3.61–3.71 (m, 2H), 3.97–4.14 (m, 1H), 4.08 (s, 3H), 4.70 (d,  $J =$

12.2 Hz, 1H), 4.76 (d,  $J$  = 12.2 Hz, 1H), 5.25 (d,  $J$  = 9.8 Hz, 1H), 6.71 (d,  $J$  = 6.7 Hz, 0.3H), 6.94–7.01 (m, 1.7H), 7.03 (d,  $J$  = 8.6 Hz, 1H), 7.16–7.33 (m, 3H), 8.09 (d,  $J$  = 9.2 Hz, 0.2H), 8.14 (d,  $J$  = 9.2 Hz, 0.8H), 8.53 (s, 1H), MS (ESI<sup>+</sup>)  $m/z$  481 (MH<sup>+</sup>), HRMS (ESI<sup>+</sup>) for C<sub>26</sub>H<sub>30</sub>FN<sub>4</sub>O<sub>4</sub> (MH<sup>+</sup>): calcd, 481.22511; found, 481.22522.

Compound (+)-**36** (121 mg) was prepared from (+)-**35** (100 mg) and **29** (36.9 mg) in the same manner as described for the synthesis of **5**. (+)-**36** <sup>1</sup>H NMR (CDCl<sub>3</sub>): δ<sub>H</sub> 1.58–1.91 (m, 6H), 2.12–2.34 (m, 2H), 3.27–3.37 (m, 1H), 3.44–3.55 (m, 1H), 3.73–3.81 (m, 4H), 3.98–4.06 (m, 1H), 4.07 (s, 3H), 4.64 (s, 2H), 4.73 (q,  $J$  = 12.6 Hz, 2H), 5.27 (d,  $J$  = 9.8 Hz, 1H), 6.71 (d,  $J$  = 7.3 Hz, 0.3H), 6.93–7.29 (m, 9H), 8.08–8.16 (m, 1.7H), 8.54 (s, 1H), MS (ESI<sup>+</sup>)  $m/z$  643 (MH<sup>+</sup>), HRMS (ESI<sup>+</sup>) for C<sub>34</sub>H<sub>36</sub>FN<sub>6</sub>O<sub>6</sub> (MH<sup>+</sup>): calcd, 643.26803; found, 643.26717.

The enantiomeric compound (-)-**36** (117 mg) was prepared in the same manner from (-)-**35** (100 mg) and **29** (36.9 mg). (-)-**36** <sup>1</sup>H NMR (CDCl<sub>3</sub>): δ<sub>H</sub> 1.63–1.90 (m, 6H), 2.07–2.35 (m, 2H), 3.26–3.37 (m, 1H), 3.46–3.55 (m, 1H), 3.72–3.82 (m, 4H), 3.98–4.06 (m, 1H), 4.08 (s, 3H), 4.64 (s, 2H), 4.73 (q,  $J$  = 12.9 Hz, 2H), 5.26 (d,  $J$  = 10.3 Hz, 1H), 6.71 (d,  $J$  = 6.1 Hz, 0.3H), 6.93–7.30 (m, 9H), 7.94–8.16 (m, 1.7H), 8.54 (s, 1H), MS (ESI<sup>+</sup>)  $m/z$ : 643 (MH<sup>+</sup>), HRMS (ESI<sup>+</sup>) for C<sub>34</sub>H<sub>36</sub>FN<sub>6</sub>O<sub>6</sub> (MH<sup>+</sup>): calcd, 643.26803; found, 643.26728.

A suspension of (+)-**36** (100 mg) and 10% Pd–C (36.0 mg) in acetic acid (3.1 mL) was stirred at room temperature for 3 h under H<sub>2</sub> atmosphere (1 kg/cm<sup>2</sup>). After the insoluble materials were filtered off, the filtrate was concentrated in vacuo to give (+)-**10** (70.0 mg). <sup>1</sup>H NMR (DMSO-*d*<sub>6</sub>): δ<sub>H</sub> 1.14 (brs, 2H), 1.57–1.99 (m, 9H), 2.85–2.96 (m, 2H), 3.22–3.41 (m, 1H), 3.58 (s, 2H), 3.63 (s, 2H), 4.02 (s, 3H), 4.59 (s, 2H), 7.01 (d,  $J$  = 8.6 Hz, 1H), 7.21 (d,  $J$  = 9.2 Hz, 1H), 7.28 (d,  $J$  = 8.0 Hz, 1H), 8.25 (d,  $J$  = 8.6 Hz, 1H), 8.73 (s, 1H), 11.15 (s, 1H), MS (ESI<sup>+</sup>)  $m/z$  509 (MH<sup>+</sup>), HRMS (ESI<sup>+</sup>) for C<sub>26</sub>H<sub>30</sub>FN<sub>6</sub>O<sub>4</sub> (MH<sup>+</sup>): calcd, 509.23126; found, 509.23213.

To a solution of the free base (60.0 mg) in dichloromethane (0.30 mL) and ethanol (0.59 mL) was added a solution of hydrochloric acid (0.236 mL, 1 M), the mixture was stirred at room temperature for 4 h and then concentrated in vacuo to give (+)-**10**.HCl (63.0 mg). mp 234–235 °C, <sup>1</sup>H NMR (DMSO-*d*<sub>6</sub>): δ 1.92–2.14 (m, 8H), 3.12–3.21 (m, 1H), 3.42–3.54 (m, 1H), 3.63–3.72 (m, 1H), 3.95–4.03 (m, 2H), 4.06 (s, 3H), 4.03–4.14 (m, 2H), 4.69 (s, 2H), 7.28 (d,  $J$  = 8.6 Hz, 1H), 7.30 (d,  $J$  = 8.0 Hz, 1H), 7.45 (d,  $J$  = 8.0 Hz, 1H), 8.00 (brs, 3H), 8.33 (d,  $J$  = 9.2 Hz, 1H), 8.83 (s, 1H), 9.68 (brs, 2H), 11.32 (s, 1H). MS (ESI<sup>+</sup>)  $m/z$  509 (MH<sup>+</sup>) (as free base). HRMS (ESI<sup>+</sup>) for C<sub>26</sub>H<sub>30</sub>FN<sub>6</sub>O<sub>4</sub> (MH<sup>+</sup>) (as free base): calcd, 509.23126; found, 509.23204. Anal. calcd for C<sub>26</sub>H<sub>29</sub>FN<sub>6</sub>O<sub>4</sub>·3HCl·0.5H<sub>2</sub>O, C 49.81, H 5.31, N 13.40%. Found: C 50.18, H 5.41, N 13.31%.

The free base of (-)-**10** (71.5 mg) was prepared from (-)-**36** (100 mg) in the same manner as described above. <sup>1</sup>H NMR (DMSO-*d*<sub>6</sub>): δ<sub>H</sub> 1.56–1.99 (m, 9H), 2.85–2.98 (m, 2H), 3.27–3.36 (m, 1H), 3.59 (s, 2H), 3.63 (s, 2H), 4.02 (s, 3H), 4.59 (s, 2H), 7.01 (d,  $J$  = 8.6 Hz, 1H), 7.21 (d,  $J$  = 9.2 Hz, 1H), 7.28 (d,  $J$  = 7.9

Hz, 1H), 8.26 (d,  $J$  = 8.6 Hz, 1H), 8.74 (s, 1H), 11.16 (s, 1H), MS (ESI<sup>+</sup>)  $m/z$ : 509 (MH<sup>+</sup>), HRMS (ESI<sup>+</sup>) for C<sub>26</sub>H<sub>30</sub>FN<sub>6</sub>O<sub>4</sub> (MH<sup>+</sup>): calcd, 509.23126; found, 509.23207. Anal. calcd for C<sub>26</sub>H<sub>29</sub>FN<sub>6</sub>O<sub>4</sub>·3HCl·1.5H<sub>2</sub>O, C 48.42, H 5.47, N 13.03%. Found: C 48.36, H 5.41, N 12.88%.

The hydrochloride salt (-)-**10**·HCl (57.8 mg) was prepared in the same manner from the free base (60.0 mg). <sup>1</sup>H NMR (DMSO-*d*<sub>6</sub>): δ<sub>H</sub> 1.93–2.25 (m, 8H), 3.12–3.21 (m, 1H), 3.48–3.56 (m, 1H), 3.63–3.71 (m, 1H), 3.96–4.04 (m, 2H), 4.06 (s, 3H), 4.05–4.14 (m, 2H), 4.69 (s, 2H), 7.28 (d,  $J$  = 9.2 Hz, 1H), 7.30 (d,  $J$  = 8.6 Hz, 1H), 7.45 (d,  $J$  = 8.0 Hz, 1H), 7.99 (brs, 3H), 8.33 (d,  $J$  = 9.2 Hz, 1H), 8.83 (s, 1H), 9.67 (brs, 2H), 11.31 (s, 1H), MS (ESI<sup>+</sup>)  $m/z$ : 509 (MH<sup>+</sup>) (as free base), HRMS (ESI<sup>+</sup>) for C<sub>26</sub>H<sub>30</sub>FN<sub>6</sub>O<sub>4</sub> (MH<sup>+</sup>) (as free base): calcd, 509.23126; found, 509.23115.

### Synthesis of compound (±)-**11** (Scheme 5)

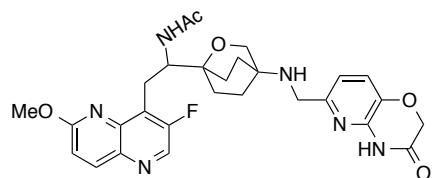

To a solution of (±)-**33** (105 mg crude, 0.24 mmol, 1.0 eq) in dichloromethane (10 mL) was added Et<sub>3</sub>N (71 mg, 0.71 mmol, 3.0 eq) and DMAP (10 mg, cat.) and then Ac<sub>2</sub>O (29 mg, 0.28 mmol, 1.2 eq), and the resulting mixture was stirred at room temperature for 2h. Partitioned between water and dichloromethane, the organic layers were washed by brine, dried over sodium sulfate and concentrated, purified by prep-TLC to give N-acetyl-**33** (48 mg, 41.7 %). <sup>1</sup>H-NMR (CDCl<sub>3</sub>, 400 MHz): δ<sub>H</sub> 8.58 (s, 1H), 8.18 ~ 8.20 (d,  $J$  = 9.39 Hz, 1H), 7.04 ~ 7.06 (d,  $J$  = 8.61 Hz, 1H), 5.82 ~ 5.84 (d,  $J$  = 10.17 Hz, 1H), 3.94 ~ 4.28 (m, 7H), 3.24 ~ 3.54 (m, 4H), 1.77 ~ 2.33 (m, 8H), 1.61 (s, 3H), 1.42 (s, 9H).

A solution of N-acetyl-**33** (48 mg, 0.10 mmol) in dichloromethane (5 mL) was added TFA (5 mL) was stirred at room temperature for 1h and then concentrated. The residue was basified by sodium carbonate solution until pH = 8 ~ 9, and extracted by EtOAc. The organic layers were washed with brine, dried over sodium sulfate, concentrated to give free amine (35 mg, 89.7 %). MS (ESI<sup>+</sup>)  $m/z$  389 (MH<sup>+</sup>).

A solution of aforementioned free amine (35 mg, 0.09mmol, 1.0 eq) and aldehyde **29** (32 mg, 0.18 mmol, 2.0 eq) in DMF:AcOH = 7:1 (5 mL) was stirred at room temperature for 30 min and then NaBH(OAc)<sub>3</sub> (57 mg, 0.27 mmol, 3.0 eq) was added and the reaction mixture was stirred at room temperature for 1h. The mixture was purified by prep-HPLC to give (±)-**11** (19 mg, 38.0 %). <sup>1</sup>H-NMR (400 MHz, CD<sub>3</sub>OD) δ<sub>H</sub> 8.59 (s, 1H), 8.14 ~ 8.16 (d,  $J$  = 8.61 Hz, 1H), 7.34 ~ 7.36 (d,  $J$  = 7.83 Hz, 1H), 7.14 ~ 7.16 (d,  $J$  = 8.61 Hz, 1H), 7.08 ~ 7.10 (d,  $J$  = 7.83 Hz, 1H), 4.68 (s, 2H), 4.43 ~ 4.46 (m, 1H), 4.21 (s, 2H), 4.11 (s, 3H), 4.06 (s, 2H), 3.60 ~ 3.68 (m, 1H), 3.14 ~ 3.20 (m, 1H), 1.85 ~ 2.30 (m, 9H), 1.69 (s, 3H). MS (ESI<sup>+</sup>)  $m/z$  550 (MH<sup>+</sup>).

### Synthesis of compound (±)-12 (Scheme 5)

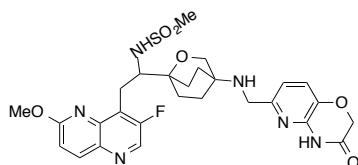

To a solution of (**±**)-**33** (110 mg crude, 0.25 mmol, 1.0 eq) in dichloromethane (10 mL) was added Et<sub>3</sub>N (75 mg, 0.75 mmol, 3.0 eq) and then MsCl (35 mg, 0.30 mmol, 1.2 eq), and the resulting mixture was stirred at room temperature for 2h. Water was added and partitioned between water and dichloromethane, the organic layers were washed with brine, dried over sodium sulfate and concentrated. The residue was purified by prep-TLC to give **33**-methane sulfonamide (72 mg, 55.8 %). MS (ESI)<sup>+</sup> *m/z* 525 (MH)<sup>+</sup>.

A solution of methane sulfonamide (72 mg, 0.14 mmol) in dichloromethane (5 mL) was added TFA (5 mL) and stirred at room temperature for 1h and then concentrated. The residue was basified by sodium carbonate solution until pH = 8 ~ 9, and extracted by EtOAc. The organic layers were washed with brine, dried over sodium sulfate, and concentrated to give methane sulfonamide free amine (43 mg, 74.1 %). MS (ESI)<sup>+</sup> *m/z* 425 (MH)<sup>+</sup>.

A solution of the free amine (43 mg, 0.10 mmol, 1.0 eq) and the aldehyde **29** (35 mg, 0.20 mmol, 2.0 eq) in DMF: AcOH = 7:1 (5 mL) was stirred at room temperature for 30 min then NaBH(OAc)<sub>3</sub> (64 mg, 0.30 mmol, 3.0 eq) was added. The mixture was stirred at room temperature for 1h and purified by prep-HPLC to give (**±**)-**12** (23 mg, 39.9 %). <sup>1</sup>H-NMR 400 MHz, CD<sub>3</sub>OD): δ<sub>H</sub> 8.64 (s, 1H), 8.18 ~ 8.20 (d, *J* = 8.61 Hz, 1H), 7.35 ~ 7.37 (d, *J* = 7.83 Hz, 1H), 7.16 ~ 7.18 (d, *J* = 8.61 Hz, 1H), 7.07 ~ 7.09 (d, *J* = 7.83 Hz, 1H), 4.68 (s, 2H), 4.21 (s, 2H), 4.11 (s, 3H), 4.05 ~ 4.08 (m, 1H), 3.98 (s, 2H), 3.50 ~ 3.58 (m, 1H), 3.21 ~ 3.28 (m, 2H), 2.30 (s, 3H), 2.00 ~ 2.26 (m, 8H), MS (ESI)<sup>+</sup> *m/z* 587 (MH)<sup>+</sup>.

### Synthesis of compound (±)-16 (Scheme 6)

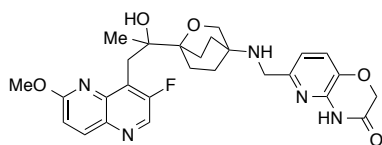

A solution of **37** (383 mg, 1.5 mmol) in 5 mL of THF was added CH<sub>3</sub>MgBr (1 mL, 3.0 M in ether, 3 mmol) at -70 °C. The mixture was stirred at -70 °C for 30 minutes then warmed to room temperature. To the reaction mixture was added saturated NH<sub>4</sub>Cl and extracted with EtOAc twice. The organic layer was concentrated and the residue was purified by prep-TLC (PE: EtOAc= 5:1) to afford a white solid **38** (R=Me) (120 mg, yield 30 %). <sup>1</sup>H-NMR (400 MHz, CDCl<sub>3</sub>) δ<sub>H</sub> 4.23 (s, 1H), 3.93 (s, 2 H), 3.57 (d, J = 6.4 Hz, 1 H), 1.92-2.07 (m, 4 H), 1.69-1.78 (m, 4 H), 1.36 (s, 9 H), 0.98 (d, J = 6.4 Hz, 3 H).

A suspension of **38** (R = Me) (120 mg, 0.44 mmol) and Dess-Martin periodinane (940 mg, 2.2 mmol) in 10 mL dichloromethane was stirred overnight at room temperature. Reaction was filtered and the solid

was washed with dichloromethane. The filtrate was concentrated and the residue was purified by prep-TLC (PE: EtOAc= 3:1) to afford a white solid **39** (R = Me) (54 mg, yield 45 %). <sup>1</sup>H-NMR (400 MHz, CDCl<sub>3</sub>) δ<sub>H</sub> 4.00 (s, 2 H), 2.17 (s, 3 H), 2.04-2.11 (m, 2 H), 1.90-1.98 (m, 2 H), 1.79-1.86 (m, 2 H), 1.40 (s, 9 H).

A solution of **40** (77 mg, 0.4 mmol) in 3 mL of THF was added LDA (0.2 mL, 2.0 M in THF, 0.4 mmol) drop wise to at -78 °C and stirred for 15 min. To this mixture was added drop wise a solution of **39** (R = Me) (54 mg, 0.2 mmol, in 1 mL of THF). The resulting mixture was stirred at -78 °C for 30 min then warmed to room temperature. The reaction was quenched by addition of saturated NH<sub>4</sub>Cl and extracted with EtOAc twice. The organic layer was concentrated and the residue was purified by prep-TLC (PE: EtOAc= 3:1) to afford a white solid **41** (R = Me) (37 mg, yield 40 %). MS (ESI)<sup>+</sup> *m/z* 462 (MH)<sup>+</sup>.

To a solution of **41** (R = Me) (37 mg, 0.08 mmol) in dichloromethane (1 mL) was added trifluoroacetic acid (1 mL) and the mixture was stirred at room temperature for 30 min and concentrated under reduced pressure. After dilution of the residue with water, the mixture was washed with methyl *t*-butyl ether twice. The aqueous layer was adjusted to pH= 13 by addition of aqueous Na<sub>2</sub>CO<sub>3</sub> solution and extracted twice with EtOAc. The combined organic layer was washed with brine, dried over anhydrous Na<sub>2</sub>SO<sub>4</sub> and concentrated to give pure **42** (R = Me) (25 mg, yield 86 %). MS (ESI)<sup>+</sup> *m/z* 362 (MH)<sup>+</sup>.

A mixture of **42** (R = Me) (25 mg, 0.07 mmol) and pyridoxazinecarbaldehyde **29** (20 mg, 0.11 mmol) in anhydrous DMF (3.5 mL) was added acetic acid (0.5 mL) was stirred at room temperature for 30 min. The resulting solution was added three times of sodium triacetoxyborohydride (42 mg, 0.2 mmol) and stirred at room temperature overnight. The mixture was concentrated under reduced pressure. After dilution of the residue with dichloromethane, the mixture was washed with saturated sodium carbonate solution, water and brine. The organic extracts were dried over anhydrous Na<sub>2</sub>SO<sub>4</sub> then concentrated under reduced pressure. The residue was purified by prep-TLC (dichloromethane/methanol = 10: 1) to give (**±**)-**16** (R = Me) (21 mg, yield 55 %). MS (ESI)<sup>+</sup> *m/z* 524 (MH)<sup>+</sup>.

To a solution of (**±**)-**16** (R = Me) (21 mg, 0.04 mmol) in dichloromethane (2 mL) and ethanol (0.5 mL) was added a solution of hydrogen chloride (10 uL, 0.1 mmol, 4 M in dioxane) under cooling with ice, the mixture was stirred at room temperature for 2 h and concentrated under reduced pressure. Treatment of the residue with ethanol gave (**±**)-**16**.HCl (R = Me). <sup>1</sup>H-NMR (400 MHz, CD<sub>3</sub>OD) δ<sub>H</sub> 9.05 (s, 1H), 8.37 (d, J = 7.2 Hz, 1H), 7.42 (d, J = 7.2 Hz, 1H), 7.36 (d, J = 8.0 Hz, 1H), 7.12 (d, J = 8.0 Hz, 1H), 4.68 (s, 2 H), 4.24 (s, 2 H), 4.16 (s, 3 H), 4.08 (s, 2 H), 3.80 (d, J = 12.8 Hz, 1H), 3.60 (d, J = 12.8 Hz, 1H), 2.37-2.42 (m, 2 H), 2.01-2.29 (m, 6 H), 1.02 (s, 3 H). MS (ESI)<sup>+</sup> *m/z* 524 (MH)<sup>+</sup>.

#### Synthesis of compound (**±**)-**17** (Scheme 6)

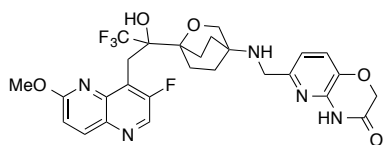

A solution of **37** (762 mg, 3 mmol) and  $\text{CF}_3\text{TMS}$  (1.14 g, 8 mmol) in 20 mL of DMF was cooled to 0 °C with ice-water. To this solution was added powdered CsF (1.3 g, 8 mmol) in small batches. The mixture was stirred overnight at room temperature, diluted with 50 mL of EtOAc, washed with water and brine, condensed. The residue was purified by column chromatography (25 % EtOAc in PE) to give pure **38** ( $\text{R} = \text{CF}_3$ ) (230 mg, yield 24 %). MS (ESI)<sup>+</sup>  $m/z$  326 (MH)<sup>+</sup>.

A suspension of **38** ( $\text{R} = \text{CF}_3$ ) (230 mg, 0.71 mmol) and Dess-Martin periodinane (452 mg, 1.06 mmol) in dichloromethane was stirred overnight at room temperature. The reaction was filtered and the solid was washed with dichloromethane. The filtrate was concentrated and the residue was purified by prep-TLC (PE: EtOAc= 3:1) to afford a white solid **39** ( $\text{R} = \text{CF}_3$ ) (160 mg, yield 69 %). <sup>1</sup>H-NMR (400 MHz,  $\text{CDCl}_3$ )  $\delta_{\text{H}}$  4.00 (s, 2 H), 1.95-2.21 (m, 6 H), 1.84-1.92 (m, 2 H), 1.76-1.83 (m, 2 H), 1.39 (s, 9 H).

A solution of **40** (192 mg, 1.0 mmol, in 4 mL of THF) was added LDA (0.5 mL, 2.0 M in THF, 1.0 mmol) drop wise at -78 °C and stirred for 15 minutes. To this mixture was added drop wise a solution of **39** ( $\text{R} = \text{CF}_3$ ) (160 mg, 0.49 mmol, in 1 mL of THF). The resulting mixture was stirred at -78 °C for 30 min then warmed to room temperature and stirred overnight. Saturated  $\text{NH}_4\text{Cl}$  was added to quench the reaction followed by extraction with EtOAc twice. The organic layer was concentrated and the residue was purified by prep-TLC (PE: EtOAc= 3:1) to afford a white solid **41** ( $\text{R} = \text{CF}_3$ ) (37 mg, yield 18 %). MS (ESI)<sup>+</sup>  $m/z$  516 (MH)<sup>+</sup>.

To a solution of **41** ( $\text{R} = \text{CF}_3$ ) (37 mg, 0.072 mmol) in dichloromethane (1 mL) was added trifluoroacetic acid (1 mL) and the mixture was stirred at room temperature for 30 minutes and concentrated under reduced pressure. After dilution of the residue with water, the mixture was washed with methyl *tert*-butyl ether twice. The aqueous layer was adjusted to pH= 13 by addition of aqueous  $\text{Na}_2\text{CO}_3$  solution and extracted twice with EtOAc. The combined EtOAc layer was washed with brine, dried over anhydrous  $\text{Na}_2\text{SO}_4$  and concentrated to give pure **42** ( $\text{R} = \text{CF}_3$ ) (20 mg, yield 67 %). MS (ESI)<sup>+</sup>  $m/z$  416 (MH)<sup>+</sup>.

A mixture of **42** ( $\text{R} = \text{CF}_3$ ) (20 mg, 0.048 mmol) and pyridoxazincarbaldehyde **29** (13 mg, 0.072 mmol) in anhydrous DMF (3.5 mL) was added acetic acid (0.5 mL) was stirred at room temperature for 30 min. The resulting solution was added three times of sodium triacetoxyborohydride (21 mg, 0.1 mmol) and stirred at room temperature for overnight. The mixture was concentrated under reduced pressure. After dilution of the residue with dichloromethane, the mixture was washed with saturated sodium carbonate solution, water and brine. The organic extracts were dried over anhydrous  $\text{Na}_2\text{SO}_4$  then concentrated under reduced pressure. The residue was purified by prep-TLC (dichloromethane/methanol = 10: 1) to give a solid. To a solution of this solid (17 mg, 0.029 mmol) in dichloromethane (2 mL) and



ethanol (0.5 mL) was added a solution of hydrogen chloride (7.3  $\mu$ L, 0.029 mmol, 4 M in dioxane) under cooling with ice, the mixture was stirred at room temperature for 2 hours and concentrated in vacuum.

Treatment of the residue with ethanol gave ( $\pm$ )-**17**.HCl ( $R = CF_3$ ).  $^1H$ -NMR (400 MHz,  $CD_3OD$ )  $\delta_H$  ppm 8.77 (s, 1 H), 8.30 (d,  $J = 9.2$  Hz, 1H), 7.34 (d,  $J = 7.6$  Hz, 1H), 7.27 (d,  $J = 9.2$  Hz, 1H), 7.10 (d,  $J = 7.6$  Hz, 1H), 4.68 (s, 2 H), 4.21 (s, 2 H), 4.12 (s, 3 H), 3.95-4.01 (m, 2 H), 3.85 (d,  $J = 14.8$  Hz, 1 H), 3.74 (d,  $J = 14.4$  Hz, 1 H), 2.42-2.54 (m, 2 H), 2.05-2.16 (m, 6 H), MS (ESI) $^+$   $m/z$  578 (MH) $^+$ .

### Synthesis of compounds (+)-**19** and (-)-**19** (Scheme 7)

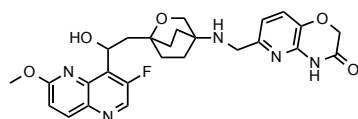

To a solution of **43** (5.78 g) in tetrahydrofuran (225 mL) was added *n*-butyl lithium (7.21 mL, 2.6 M in hexane) at  $-78^\circ C$ , the mixture was stirred at the same temperature for 30 minutes. A solution of **44** (2.02 g) was added to the mixture at  $-78^\circ C$ , the mixture was stirred at the same temperature for 2 h. After quenching the reaction by adding of a citric acid solution (36.0 mL, 0.5 M in water), the aqueous solution was extracted with dichloromethane followed by diluting with water. The organic extracts were washed with brine, dried over anhydrous sodium sulfate, filtered, and then concentrated in vacuo. Flash chromatography (hexane/ethyl acetate = 3:1) of the residue gave the racemate **45** (2.64 g). Optical resolution of the racemate **45** (CHIRALPAK IC, TBME : hexane : ethanol = 5 : 3 : 2) gave (+)-**45** and (-)-**45**. (+)-**45**  $[\alpha]_D^{27} +13.7$  ( $c$  0.2, MeOH), IR (ATR) 3333, 1710, 1614, 1161  $cm^{-1}$ ,  $^1H$  NMR (400 MHz,  $CDCl_3$ )  $\delta_H$  1.43 (s, 9H), 1.79–1.95 (m, 5H), 2.04–2.21 (m, 4H), 2.34 (dd,  $J = 14.7, 9.2$  Hz, 1H), 3.91–3.99 (m, 2H), 4.06 (s, 3H), 4.28 (s, 1H), 5.51 (d,  $J = 8.6$  Hz, 1H), 5.77 (ddd,  $J = 9.2, 8.6, 3.0$  Hz, 1H), 7.09 (d,  $J = 9.2$  Hz, 1H), 8.21 (d,  $J = 9.2$  Hz, 1H), 8.62 (d,  $J = 1.2$  Hz, 1H), MS (ESI) $^+$   $m/z$  448 (MH) $^+$ , HRMS (ESI) $^+$  for  $C_{23}H_{31}FN_3O_5$  (MH) $^+$ : calcd, 448.22477; found, 448.22560. (-)-**45**  $[\alpha]_D^{27} -10.4$  ( $c$  0.2, MeOH), IR (ATR) 3324, 1710, 1614, 1161  $cm^{-1}$ ,  $^1H$  NMR (400 MHz,  $CDCl_3$ )  $\delta_H$  1.43 (s, 9H), 1.80–1.95 (m, 5H), 2.03–2.21 (m, 4H), 2.34 (dd,  $J = 14.7, 9.2$  Hz, 1H), 3.91–3.99 (m, 2H), 4.06 (s, 3H), 4.28 (s, 1H), 5.51 (d,  $J = 8.6$  Hz, 1H), 5.77 (ddd,  $J = 9.2, 8.6, 3.0$  Hz, 1H), 7.09 (d,  $J = 9.2$  Hz, 1H), 8.21 (d,  $J = 9.2$  Hz, 1H), 8.62 (d,  $J = 1.2$  Hz, 1H), MS (ESI) $^+$   $m/z$  448 (MH) $^+$ , HRMS (ESI) $^+$  for  $C_{23}H_{31}FN_3O_5$  (MH) $^+$ : calcd, 448.22477; found, 448.22543.

Deprotection of (+)-**45** (125 mg) by treatment with TFA in a manner similar to the synthesis of (-)-**6** gave free amine (91.4 mg).  $[\alpha]_D^{25} +25.2$  ( $c$  0.1,  $CHCl_3$ ), IR (ATR) 3415, 1613, 1202  $cm^{-1}$ ,  $^1H$  NMR (400 MHz,  $DMSO-d_6$ )  $\delta_H$  1.38 (s, 2H), 1.62–1.95 (m, 7H), 2.04–2.19 (m, 2H), 2.35 (dd,  $J = 14.7, 9.8$  Hz, 1H), 3.60–3.67 (m, 2H), 4.06 (s, 3H), 5.47–5.58 (m, 1H), 5.77–5.85 (m, 1H), 7.09 (d,  $J = 9.2$  Hz, 1H), 8.21 (d,  $J = 9.2$  Hz, 1H), 8.63 (d,  $J = 1.2$  Hz, 1H). MS (ESI) $^+$   $m/z$ : 348 (MH) $^+$ . HRMS (ESI) $^+$  for  $C_{18}H_{23}FN_3O_3$  (MH) $^+$ : calcd, 348.17234; found, 348.17286.

Reductive amination of the aldehyde **29** (41.2 mg) with the amine (76.4 mg) just prepared from (+)-**45** in the same manner as described for the synthesis of (-)-**6** gave (+)-**19** (95.9 mg) as a powder from ethanol. mp  $125^\circ C$ ,  $[\alpha]_D^{27} +26.3$  ( $c$  0.1, DMF), IR (ATR) 1696, 1614, 1185  $cm^{-1}$ ,  $^1H$  NMR (400 MHz,  $DMSO-d_6$ )  $\delta_H$  1.49–1.84 (m, 8H), 1.90 (dd,  $J = 14.0, 5.5$  Hz, 1H), 1.96–2.02 (m, 1H), 2.13 (dd,  $J = 14.0, 7.3$  Hz, 1H), 3.36–3.48 (m, 2H), 3.57 (d,  $J = 5.5$  Hz, 2H), 4.04 (s, 1H),

4.58 (s, 2H), 5.23 (d,  $J = 5.5$  Hz, 1H), 5.90–5.99 (m, 1H), 6.97 (d,  $J = 8.0$  Hz, 1H), 7.24 (d,  $J = 9.2$  Hz, 2H), 7.25 (d,  $J = 8.0$  Hz, 2H), 8.27 (d,  $J = 9.2$  Hz, 1H), 8.74 (d,  $J = 1.8$  Hz, 1H), MS (ESI<sup>+</sup>)  $m/z$  510 (MH<sup>+</sup>), HRMS (ESI<sup>+</sup>) for C<sub>26</sub>H<sub>29</sub>FN<sub>5</sub>O<sub>5</sub> (MH<sup>+</sup>): calcd, 510.21527; found, 510.21575.

Anal. Calcd for C<sub>26</sub>H<sub>28</sub>FN<sub>5</sub>O<sub>5</sub>•0.8 H<sub>2</sub>O, C 59.60, H 5.69, N 13.37%. Found C 59.56, H 5.50, N 13.20%.

Deprotection of (-)-**45** (125 mg) with TFA gave enantiomeric free amine (85.5 mg). [ $\alpha$ ]<sub>D</sub><sup>25</sup> -25.3 ( $c$  0.1, CHCl<sub>3</sub>), IR (ATR) 3414, 1613, 1202 cm<sup>-1</sup>, <sup>1</sup>H NMR (400 MHz, DMSO-*d*<sub>6</sub>)  $\delta$ <sub>H</sub> 1.61–1.95 (m, 7H), 2.04–2.19 (m, 2H), 2.35 (dd,  $J = 14.7, 9.2$  Hz, 1H), 3.60–3.67 (m, 2H), 4.06 (s, 3H), 5.48–5.56 (m, 1H), 5.78–5.84 (m, 1H), 7.09 (d,  $J = 9.2$  Hz, 1H), 8.21 (d,  $J = 9.2$  Hz, 1H), 8.63 (d,  $J = 1.2$  Hz, 1H), MS (ESI<sup>+</sup>)  $m/z$ : 348 (MH<sup>+</sup>), HRMS (ESI<sup>+</sup>) for C<sub>18</sub>H<sub>23</sub>FN<sub>3</sub>O<sub>3</sub> (MH<sup>+</sup>): calcd, 348.17234; found, 348.17189.

A similar reductive amination of **29** (41.2 mg) with the free amine (76.4 mg) from (-)-**45** as described earlier produced enantiomer (-)-**19** (97.3 mg) as powder from ethanol. mp 125 °C, [ $\alpha$ ]<sub>D</sub><sup>24</sup> -27.0 ( $c$  0.1, DMF), IR (ATR) 1695, 1614, 1185 cm<sup>-1</sup>, <sup>1</sup>H NMR (400 MHz, DMSO-*d*<sub>6</sub>)  $\delta$ <sub>H</sub> 1.49–1.84 (m, 8H), 1.90 (dd,  $J = 14.0, 5.5$  Hz, 1H), 1.96–2.02 (m, 1H), 2.13 (dd,  $J = 14.0, 7.3$  Hz, 1H), 3.36–3.48 (m, 2H), 3.57 (d,  $J = 5.5$  Hz, 2H), 4.04 (s, 1H), 4.58 (s, 2H), 5.23 (d,  $J = 5.5$  Hz, 1H), 5.90–5.99 (m, 1H), 6.97 (d,  $J = 8.0$  Hz, 1H), 7.24 (d,  $J = 9.2$  Hz, 2H), 7.25 (d,  $J = 8.0$  Hz, 2H), 8.27 (d,  $J = 9.2$  Hz, 1H), 8.74 (d,  $J = 1.8$  Hz, 1H), MS (ESI<sup>+</sup>)  $m/z$  510 (MH<sup>+</sup>), HRMS (ESI<sup>+</sup>) for C<sub>26</sub>H<sub>29</sub>FN<sub>5</sub>O<sub>5</sub> (MH<sup>+</sup>): calcd, 510.21527; found, 510.21576.

Anal. calcd for C<sub>26</sub>H<sub>28</sub>FN<sub>5</sub>O<sub>5</sub>•H<sub>2</sub>O, C 59.19, H 5.73, N 13.28%. Found C 59.37, H 5.50, N 13.14%.

### Synthesis of compound ( $\pm$ )-**20** (Scheme 8)

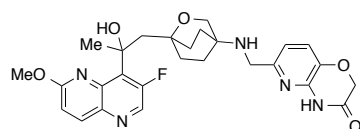

A solution of **44** (810 mg, 3 mmol) in THF (10 mL) was added MeMgCl (2.1 mL, 6.3 mmol) at -78 °C under N<sub>2</sub> and then stirred at -78 °C for 1.5 hours. After quenching with saturated ammonium chloride solution, the mixture was extracted with EtOAc twice. The organic layers were dried and concentrated. The residue was purified by column chromatography (PE:EtOAc=4:1) to give **46** (800 mg, 93.7 %).

To a solution of **46** (800 mg, 2.8 mmol) in dichloromethane (70 mL) was added Dess-Martin (2.0 g, 4.7 mmol). The mixture was stirred at room temperature for 1.5 hours. The reaction was filtered and the filtrate was concentrated in vacuo. The residue was purified by column chromatography (PE:EtOAc=4:1) to give **47** (450 mg, 56.7%).

A solution of **48** (570 mg, 3.2 mmol) in THF at -78 °C was added LDA (1.75 mL, 3.5 mmol) drop wise and stirred for 20 minutes. A solution of **47** (450 mg, 1.6 mmol) in THF was added drop wise to the mixture for 15 minute at -78 °C. The mixture was stirred at 0 °C for 30 min. After quenching the reaction by addition of saturated NH<sub>4</sub>Cl it was extracted with EtOAc twice. The organic layer was

concentrated and the residue was purified by column chromatography (PE:EtOAc=4:1) to give **49** (370 mg, 25 %). MS (ESI)<sup>+</sup> *m/z* 462 (MH)<sup>+</sup>.

To a solution of **49** (370 mg, 0.8mmol) in dichloromethane (5 mL) was added TFA (15 mL). The mixture was stirred at room temperature overnight. The reaction mixture was concentrated and then the NaHCO<sub>3</sub> solution was added. The mixture was extracted with dichloromethane/MeOH (10:1). The organic extracts were dried over anhydrous sodium sulfate, filtered, and then concentrated under reduced pressure to give the crude free amine (220 mg, 76.5%). MS (ESI)<sup>+</sup> *m/z* 362 (MH)<sup>+</sup>.

A mixture of the free amine (30 mg, 0.08 mmol) and pyridoxazincarbaldehyde **29** (50 mg, 0.28mmol) in anhydrous DMF (3.5 mL) was added acetic acid (0.5 mL) was stirred at room temperature for 30 min. The resulting solution was added three times of sodium triacetoxyborohydride (50 mg, 0.25 mmol) and stirred at room temperature for overnight. The mixture was concentrated under reduced pressure. After dilution of the residue with dichloromethane, the mixture was washed with saturated sodium carbonate solution, water and brine. The organic extracts were dried over anhydrous Na<sub>2</sub>SO<sub>4</sub> then concentrated in vacuo. The residue was purified by prep-TLC (DCM/MeOH = 10: 1) to afford a solid (**±**)-**20**. <sup>1</sup>H-NMR (400 MHz, CD<sub>3</sub>OD) δ<sub>H</sub> 8.65 (s, 1 H), 8.25 (d, *J* = 8.8 Hz, 1 H), 7.45 (d, *J* = 9.6 Hz, 1H), 7.2 (d, *J* = 8.0 Hz, 1H), 7.16 (d, *J* = 8.0 Hz, 1H), 4.64 (s, 2 H), 4.19 (s, 3 H), 4.05 (m, 2 H), 3.65 (m, 1H), 3.45 (m, 1H), 2.61 (d, *J* = 8.0 Hz, 1H), 2.25 (m, 1 H), 1.75-2.1 (m, 8 H), 1.65 (s, 3 H), MS (ESI)<sup>+</sup> *m/z* 524 (MH)<sup>+</sup>.

#### Synthesis of compound (**±**)-**22**, (**±**)-**23** and (**±**)-**21** (Scheme 9)

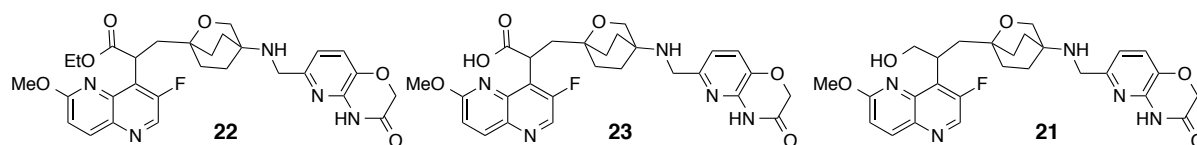

To a solution of **50** (215 mg, 0.43 mmol) in EtOAc (20 mL) was added Pd/C (100 mg, 10 %) and the mixture was stirred at 40 °C for 1.5 h. After filtration, the mixture was concentrated in vacuo to give the crude **51** (210 mg, 96.8%). MS (ESI)<sup>+</sup> *m/z* 504.5 (MH)<sup>+</sup>.

To a solution of **51** (210 mg, 0.432 mmol) in dichloromethane (2 mL) was added TFA (10 mL). The mixture was stirred at room temperature overnight. The reaction solution was concentrated and then the aqueous NaHCO<sub>3</sub> solution was added. The mixture was extracted with ethyl acetate. The organic extracts were washed with water, dried over anhydrous sodium sulfate, filtered, and then concentrated under reduced pressure to give the crude free amine (120 mg, 69.2%). MS (ESI)<sup>+</sup> *m/z* 404.5 (MH)<sup>+</sup>.

A mixture of the aforementioned free amine (120 mg, 0.3 mmol) and pyridoxazincarbaldehyde **29** (150 mg, 0.83 mmol) in anhydrous DMF (3.5 mL) was added acetic acid (0.5 mL) and stirred at room temperature for 30 min. The resulting solution was added to three fold excess of sodium

triacetoxyborohydride (210 mg, 1 mmol) and stirred at room temperature overnight. The mixture was concentrated under reduced pressure. After dilution of the residue with dichloromethane, the mixture was washed with saturated sodium carbonate solution, water and brine. The organic extracts were dried over anhydrous Na<sub>2</sub>SO<sub>4</sub> then concentrated in vacuo. The residue was purified by prep-TLC (DCM/MeOH = 10: 1) to afford (±)-**22** as a solid. <sup>1</sup>H-NMR (400 MHz, CD<sub>3</sub>OD) δ<sub>H</sub> 8.65 (s, 1 H), 8.25 (d, J = 8.8 Hz, 1 H), 7.45 (d, J = 9.6 Hz, 1H), 7.2 (d, J = 8.0 Hz, 1H), 7.16 (d, J = 8.0 Hz, 1H), 5.7 (d, J = 9.6 Hz, 1H), 4.64 (s, 2 H), 4.19 (s, 3 H), 4.00 (s, 2 H), 3.85 (s, 2 H), 2.25 (m, 2 H), 1.75-2.1 (m, 8 H), 1.05-1.1 (m, 2 H), MS (ESI)<sup>+</sup> *m/z* 566.5 (MH)<sup>+</sup>.

A solution of **22** (100 mg, 0.177 mmol) in 10 mL of THF/MeOH/H<sub>2</sub>O (2:2:1) was added LiOH.H<sub>2</sub>O (84 mg, 2 mmol) at room temperature. The mixture was stirred overnight, diluted with water and washed with MTBE twice. The water layer was acidified to pH= 5 with hydrochloric acid then extracted with EtOAc twice. The EtOAc layer was washed with brine, dried over anhydrous Na<sub>2</sub>SO<sub>4</sub> and condensed. The residue was purified by prep-TLC (DCM/MeOH = 8: 1) to give (±)-**23** as a white solid. <sup>1</sup>H-NMR (400 MHz, CD<sub>3</sub>OD) δ<sub>H</sub> 8.65 (s, 1 H), 8.25 (d, J = 8.8 Hz, 1H), 7.45 (d, J = 9.6 Hz, 1H), 7.2 (d, J = 8.0 Hz, 1H), 6.85 (d, J = 8.4 Hz, 1H), 4.78 (d, J = 8.0 Hz, 1H), 4.65 (s, 2H), 4.15 (s, 3 H), 3.8 (s, 2 H), 3.5 (m, 2 H), 2.65 (d, J = 9 Hz, 1H), 2.25 (m, 1 H), 1.65-1.9 (m, 8 H), MS (ESI)<sup>+</sup> *m/z* 538.5 (MH)<sup>+</sup>.

To a solution of **51** (150 mg, 0.3 mmol) in THF (10 mL) was added LiAlH<sub>4</sub> (20 mg, 0.53 mmol). The mixture was stirred at room temperature for 1.5 h. After quenching the reaction with saturated ammonium chloride solution, the mixture was extracted with EtOAc twice. The organic layers were dried and concentrated to give the crude **52** (50 mg, 36.2%). MS (ESI)<sup>+</sup> *m/z* 462 (MH)<sup>+</sup>.

To a solution of **52** (50 mg, 0.11mmol) in dichloromethane (2 mL) was added TFA (5 mL). The mixture was stirred at room temperature for overnight. The reaction solution was concentrated and then the NaHCO<sub>3</sub> solution was added. The mixture was extracted with dichloromethane/MeOH (10:1). The organic extracts were dried over anhydrous sodium sulfate, filtered, and then concentrated in vacuo to give the crude free amine (30 mg, 76.5%). MS (ESI)<sup>+</sup> *m/z* 362 (MH)<sup>+</sup>.

A mixture of the aforementioned free amine (30 mg, 0.08 mmol) and pyridoxazinecarbaldehyde **29** (50 mg, 0.28mmol) in anhydrous DMF (3.5 mL) was added acetic acid (0.5 mL) was stirred at room temperature for 30 min. The resulting solution was added three times of sodium triacetoxyborohydride (50 mg, 0.25 mmol) and stirred at room temperature for overnight. The mixture was concentrated under reduced pressure. After dilution with dichloromethane, the mixture was washed with saturated sodium carbonate solution, water and brine. The organic extracts were dried over anhydrous Na<sub>2</sub>SO<sub>4</sub> then concentrated in vacuo. The residue was purified by prep-TLC (DCM/MeOH = 10: 1) to afford (±)-**21** as a solid. <sup>1</sup>H-NMR (400 MHz, CD<sub>3</sub>OD) δ<sub>H</sub> 8.65 (s, 1 H), 8.25 (d, J = 8.8 Hz, 1H), 7.45 (d, J = 9.6 Hz, 1H), 7.2 (d, J = 8.0 Hz, 1H), 7.16 (d, J = 8.0 Hz, 1H), 4.64 (s, 2 H), 4.19 (s, 3 H), 4.00 (m, 1 H), 3.65 (s, 2H), 3.35 (s, 1H), 3.25 (s, 1H), 1.95 (m, 2 H), 1.75-2.1 (m, 8 H), MS (ESI)<sup>+</sup> *m/z* 524 (M+1)<sup>+</sup>.

## Synthesis of compounds (+)-**24** and (-)-**24** (Scheme 10)

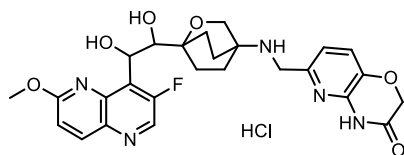

A mixture of **53** (800 mg), osmium tetroxide solution (0.95 mL, 2.5 wt% in *tert*-butanol) and 4-methylmorpholine *N*-oxide solution (146 mL, 50 wt% in water) in *tert*-butanol (13.6 mL) and water (1.36 mL) was stirred at room temperature for 5 h. After dilution of the mixture with water, the mixture was added sodium hydrogen sulfite (1.12 g). The mixture was extracted with ethyl acetate. The organic extracts were dried over anhydrous sodium sulfate, filtered, and then concentrated in vacuo. Flash chromatography of the residue gave the racemate **54** (844.1 mg).  $^1\text{H}$  NMR ( $\text{CDCl}_3$ ):  $\delta_{\text{H}}$  1.42 (s, 9H), 1.77–2.30 (m, 8H), 3.68–3.73 (m, 2H), 3.82–3.98 (m, 2H), 4.06 (s, 3H), 4.28 (brs, 1H), 5.68 (dd,  $J = 8.6, 3.1$  Hz, 1H), 5.78 (d,  $J = 7.9$  Hz, 1H), 7.10 (d,  $J = 8.6$  Hz, 1H), 8.23 (d,  $J = 9.2$  Hz, 1H), 8.65 (d,  $J = 1.2$  Hz, 1H), MS ( $\text{ESI}^+$ )  $m/z$ : 464 ( $\text{MH}^+$ ), HRMS ( $\text{ESI}^+$ ) for  $\text{C}_{23}\text{H}_{31}\text{FN}_3\text{O}_6$  ( $\text{MH}^+$ ): calcd, 464.21969; found, 464.22023.

Optical resolution of the racemate **54** with CHIRALPAK IA (hexane-ethanol = 30:70) gave (+)-**54** (473 mg,  $[\alpha]_{\text{D}}^{27} +61.7$  ( $c$  0.3,  $\text{CHCl}_3$ )) and (-)-**54** (461.5 mg,  $[\alpha]_{\text{D}}^{27} -47.9$  ( $c$  0.3,  $\text{CHCl}_3$ )).

Deprotection of (+)-**54** (195 mg) in the same manner as described earlier gave free amine (140 mg).  $^1\text{H}$  NMR ( $\text{CDCl}_3$ ):  $\delta_{\text{H}}$  1.40–2.27 (m, 8H), 3.51–3.63 (m, 2H), 3.65–3.82 (m, 2H), 4.06 (s, 3H), 5.73 (q,  $J = 3.5$  Hz, 1H), 5.79 (d,  $J = 7.9$  Hz, 1H), 7.11 (d,  $J = 9.2$  Hz, 1H), 8.23 (d,  $J = 9.2$  Hz, 1H), 8.65 (d,  $J = 1.2$  Hz, 1H), MS ( $\text{ESI}^+$ )  $m/z$ : 364 ( $\text{MH}^+$ ), HRMS ( $\text{ESI}^+$ ) for  $\text{C}_{18}\text{H}_{23}\text{FN}_3\text{O}_4$  ( $\text{MH}^+$ ): calcd, 364.16726; found, 364.16631.

Usual reductive amination of aldehyde **29** (66.9 mg) with the amine (130 mg) prepared above afforded (+)-**24** as a powder.  $[\alpha]_{\text{D}}^{25} +16.0$  ( $c$  0.2, MeOH),  $^1\text{H}$  NMR ( $\text{DMSO}-d_6$ ):  $\delta_{\text{H}}$  1.36–2.00 (m, 8H), 2.14 (brs, 1H), 2.88–3.25 (m, 2H), 3.51 (brs, 2H), 3.64 (t,  $J = 5.8$  Hz, 1H), 4.03 (s, 3H), 4.57 (s, 2H), 5.00 (d,  $J = 5.5$  Hz, 1H), 5.39 (d,  $J = 6.7$  Hz, 1H), 5.78 (d,  $J = 6.1$  Hz, 1H), 6.93 (d,  $J = 8.6$  Hz, 1H), 7.22 (d,  $J = 9.2$  Hz, 1H), 7.23 (d,  $J = 9.2$  Hz, 1H), 8.26 (d,  $J = 9.2$  Hz, 1H), 8.70 (d,  $J = 1.8$  Hz, 1H), 11.11 (s, 1H), MS ( $\text{ESI}^+$ )  $m/z$ : 526 ( $\text{MH}^+$ ), HRMS ( $\text{ESI}^+$ ) for  $\text{C}_{26}\text{H}_{29}\text{FN}_5\text{O}_6$  ( $\text{MH}^+$ ): calcd, 526.21019; found, 526.21096. Anal. calcd for  $\text{C}_{26}\text{H}_{28}\text{FN}_5\text{O}_6 \cdot \text{HCl} \cdot 0.7\text{H}_2\text{O}$ , C 54.35, H 5.33, N 12.19%. Found C 54.57, H 5.44, N 11.85%.

Similar TFA deprotection of (-)-**54** (195 mg) gave the enantiomeric free amine (142 mg).  $^1\text{H}$  NMR ( $\text{CDCl}_3$ ):  $\delta_{\text{H}}$  1.40–2.27 (m, 8H), 3.51–3.63 (m, 2H), 3.65–3.82 (m, 2H), 4.06 (s, 3H), 5.73 (q,  $J = 3.5$  Hz, 1H), 5.79 (d,  $J = 7.9$  Hz, 1H), 7.11 (d,  $J = 9.2$  Hz, 1H), 8.23 (d,  $J = 9.2$  Hz, 1H), 8.65 (d,  $J = 1.2$  Hz, 1H), MS ( $\text{ESI}^+$ )  $m/z$ : 364 ( $\text{MH}^+$ ), HRMS ( $\text{ESI}^+$ ) for  $\text{C}_{18}\text{H}_{23}\text{FN}_3\text{O}_4$  ( $\text{MH}^+$ ): calcd, 364.16726; found, 364.16759.

(-)-**24** (138 mg) was prepared in the similar manner from the enantiomeric free amine (130 mg) by reductive amination.  $[\alpha]_D^{25}$  -22.3 (*c* 0.2, MeOH),  $^1\text{H}$  NMR (DMSO- $d_6$ ):  $\delta_{\text{H}}$  1.36–2.00 (m, 8H), 2.14 (brs, 1H), 2.95–3.26 (m, 2H), 3.51 (s, 2H), 3.64 (t,  $J$  = 5.5 Hz, 1H), 4.03 (s, 3H), 4.57 (s, 2H), 5.01 (d,  $J$  = 6.1 Hz, 1H), 5.39 (d,  $J$  = 6.7 Hz, 1H), 5.78 (t,  $J$  = 6.1 Hz, 1H), 6.93 (d,  $J$  = 7.9 Hz, 1H), 7.22 (d,  $J$  = 9.2 Hz, 1H), 7.23 (d,  $J$  = 8.6 Hz, 1H), 8.26 (d,  $J$  = 9.2 Hz, 1H), 8.70 (d,  $J$  = 1.8 Hz, 1H), 11.11 (s, 1H), MS (ESI $^+$ )  $m/z$ : 526 (MH $^+$ ), HRMS (ESI $^+$ ) for C<sub>26</sub>H<sub>29</sub>FN<sub>5</sub>O<sub>6</sub> (MH $^+$ ): calcd, 526.21019; found, 526.20961. Anal. calcd for C<sub>26</sub>H<sub>28</sub>FN<sub>5</sub>O<sub>6</sub>·HCl·0.5H<sub>2</sub>O, C 54.69, H 5.30, N 12.27%. Found C 54.80, H 5.33, N 12.11%.

### Synthesis of compound (+)-**25** and (-)-**25** (Scheme 10)

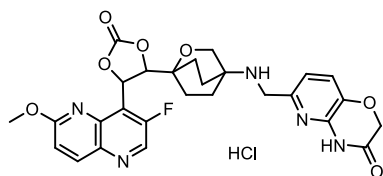

To a solution of (+)-**54** (270 mg) in dichloromethane (3.0 mL) was added triethylamine (146 mL) and triphosgene (176 mg) under cooling with ice, the mixture was stirred at the same temperature for 3 h, and then concentrated in vacuo. Flash chromatography (silica, hexane : ethyl acetate = 1:1) of the residue gave (+)-**55** (222 mg).  $^1\text{H}$  NMR (CDCl<sub>3</sub>):  $\delta_{\text{H}}$  1.43 (s, 9H), 1.48–2.34 (m, 8H), 3.96–4.08 (m, 2H), 4.10 (s, 3H), 4.32 (brs, 1H), 4.73 (d,  $J$  = 6.1 Hz, 1H), 6.39 (d,  $J$  = 5.5 Hz, 1H), 7.13 (d,  $J$  = 9.2 Hz, 1H), 8.23 (d,  $J$  = 9.2 Hz, 1H), 8.71 (s, 1H), MS (ESI $^+$ )  $m/z$ : 490 (MH $^+$ ), HRMS (ESI $^+$ ) for C<sub>24</sub>H<sub>29</sub>FN<sub>3</sub>O<sub>7</sub> (MH $^+$ ): calcd, 490.19895; found, 490.19921.

Usual Boc deprotection of (+)-**55** (110 mg) with TFA gave the free amine (84.5 mg).  $^1\text{H}$  NMR (CDCl<sub>3</sub>):  $\delta_{\text{H}}$  1.35–2.33 (m, 8H), 3.64–3.75 (m, 2H), 4.10 (s, 3H), 4.73 (d,  $J$  = 5.5 Hz, 1H), 6.40 (d,  $J$  = 5.5 Hz, 1H), 7.13 (d,  $J$  = 9.2 Hz, 1H), 8.22 (d,  $J$  = 9.2 Hz, 1H), 8.71 (s, 1H), MS (ESI $^+$ )  $m/z$ : 390 (MH $^+$ ), HRMS (ESI $^+$ ) for C<sub>19</sub>H<sub>21</sub>FN<sub>3</sub>O<sub>5</sub> (MH $^+$ ): calcd, 390.14652; found, 390.14627.

The free amine (80 mg) was reductively aminated with aldehyde **29** (38.4 mg) following usual protocol to give (+)-**25** (103 mg) as a powder.  $[\alpha]_D^{23}$  +102 (*c* 0.2, MeOH),  $^1\text{H}$  NMR (DMSO- $d_6$ ):  $\delta_{\text{H}}$  1.44–1.81 (m, 6H), 1.98–2.10 (m, 2H), 3.62 (brs, 2H), 3.70 (s, 2H), 4.03 (s, 3H), 4.59 (s, 2H), 4.97 (d,  $J$  = 5.5 Hz, 1H), 6.45 (d,  $J$  = 5.5 Hz, 1H), 7.00 (d,  $J$  = 7.9 Hz, 1H), 7.28 (d,  $J$  = 7.9 Hz, 1H), 7.33 (d,  $J$  = 9.2 Hz, 1H), 8.37 (d,  $J$  = 9.2 Hz, 1H), 8.96 (s, 1H), 11.15 (s, 1H), MS (ESI $^+$ )  $m/z$ : 552 (MH $^+$ ), HRMS (ESI $^+$ ) for C<sub>27</sub>H<sub>27</sub>FN<sub>5</sub>O<sub>7</sub> (MH $^+$ ): calcd, 552.18945; found, 552.18865. Anal. calcd for C<sub>27</sub>H<sub>26</sub>FN<sub>5</sub>O<sub>7</sub>·HCl, C 55.15, H 4.63, N 11.91%. Found C 55.01, H 4.64, N 11.83%.

The enantiomer (-)-**55** (164 mg) was prepared in the similar manner from (-)-**54** (260 mg).  $^1\text{H}$  NMR (CDCl<sub>3</sub>):  $\delta_{\text{H}}$  1.43 (s, 9H), 1.58–1.99 (m, 6H), 2.08–2.35 (m, 2H), 3.96–4.10 (m, 2H), 4.10 (s, 3H), 4.32 (brs, 1H), 4.73 (d,  $J$  = 6.1 Hz, 1H), 6.39 (d,  $J$  = 5.5 Hz, 1H), 7.13 (d,  $J$  = 9.2 Hz, 1H), 8.22 (d,  $J$  = 9.2 Hz,

1H), 8.71 (s, 1H), MS (ESI<sup>+</sup>) *m/z* 490 (MH<sup>+</sup>), HRMS (ESI<sup>+</sup>) for C<sub>24</sub>H<sub>29</sub>FN<sub>3</sub>O<sub>7</sub> (MH<sup>+</sup>): calcd, 490.19895; found, 490.19983.

TFA catalyzed deprotection of (-)-**55** (150 mg) produced the free amine (119 mg). <sup>1</sup>H NMR (CDCl<sub>3</sub>): δ<sub>H</sub> 1.38–2.31 (m, 8H), 3.64–3.76 (m, 2H), 4.10 (s, 3H), 4.73 (d, *J* = 6.1 Hz, 1H), 6.40 (d, *J* = 6.1 Hz, 1H), 7.13 (d, *J* = 9.2 Hz, 1H), 8.22 (d, *J* = 9.2 Hz, 1H), 8.71 (s, 1H), MS (ESI<sup>+</sup>) *m/z* 390 (MH<sup>+</sup>), HRMS (ESI<sup>+</sup>) for C<sub>19</sub>H<sub>21</sub>FN<sub>3</sub>O<sub>5</sub> (MH<sup>+</sup>): calcd, 390.14652; found, 390.14601.

The aforementioned free amine (110 mg) was reacted with aldehyde **29** (52.8 mg) in a standard manner to yield (-)-**25** (159 mg) as a powder. mp 211 °C, [α]<sub>D</sub><sup>24</sup> -88 (*c* 0.2, MeOH), <sup>1</sup>H NMR (DMSO-*d*<sub>6</sub>): δ<sub>H</sub> 1.42–1.81 (m, 6H), 1.98–2.10 (m, 2H), 3.63 (d, *J* = 5.5 Hz, 1H), 3.70 (brs, 2H), 4.03 (s, 3H), 4.59 (s, 2H), 4.97 (d, *J* = 5.5 Hz, 1H), 6.45 (d, *J* = 5.5 Hz, 1H), 7.00 (d, *J* = 7.9 Hz, 1H), 7.28 (d, *J* = 7.9 Hz, 1H), 7.33 (d, *J* = 9.2 Hz, 1H), 8.37 (d, *J* = 9.2 Hz, 1H), 8.96 (s, 1H), 11.15 (s, 1H), MS (ESI<sup>+</sup>) *m/z* 552 (MH<sup>+</sup>), HRMS (ESI<sup>+</sup>) for C<sub>27</sub>H<sub>27</sub>FN<sub>5</sub>O<sub>7</sub> (MH<sup>+</sup>): calcd, 552.18945; found, 552.18940. Anal. calcd for C<sub>27</sub>H<sub>26</sub>FN<sub>5</sub>O<sub>7</sub>·HCl, C 55.15, H 4.63, N 11.91%. Found C 54.89, H 4.35, N 11.76%.

Compound 5

測定番号: 136-07-062  
試料名(分子量): 136-07-062(mw=507)  
イオン化モード: ネガティブESI+  
測定日時: 2010/03/29 13:25:45  
装置構成: JMS-T100LP  
質量電荷比範囲: 100.00-1000.00  
イオン化モード: ネガティブESI+  
測定日時: 2010/03/29 14:03:34

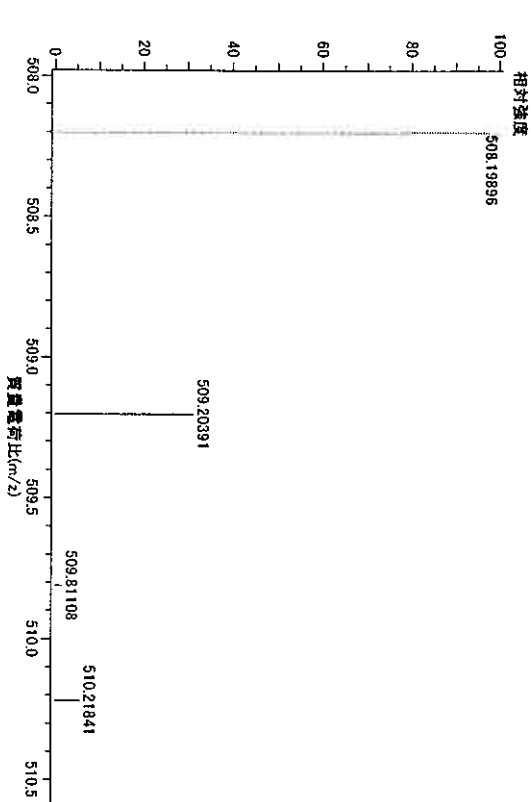

組成式:  $C_{24}H_{21}FN_3O_5$   
モノアイソピーク質量: 508.19892  
平均質量: 508.52168  
作成日時: 2010/03/29 14:03:34  
整数質量: 508  
作成者: Administrator

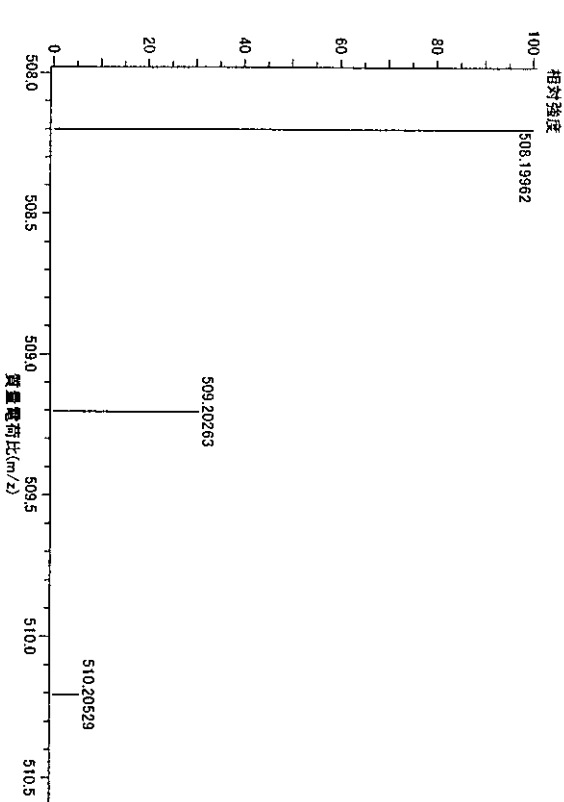

測定日時: 2010/03/29 13:25:45  
試料名: 136-07-062(mw=507)  
説明:   
イオン化モード: ネガティブESI+  
処理履歴: m/z補決定(ピーク検出[重心:40.0面積]:ピーク補正[10.0%]:平滑化[5.0])  
電荷数: 1  
元素:  $^{12}C_0$  . 26,  $^1H_0$  . 27,  $^{19}F_0$  . 1,  $^{14}N_0$  . 5,  $^{16}O_0$  . 5  
許容誤差: 5.00(mmu)  
不飽和数: -1.5 . 20.0 (確数: 両方)

| 質量        | 強度       | 計算質量      | 質量差   | 推定組成式                             | 不飽和数 |
|-----------|----------|-----------|-------|-----------------------------------|------|
| 508.19896 | 28357018 | 508.19962 | -0.66 | $^{12}C_{24}H_{21}F_1N_3^{16}O_5$ | 15.5 |

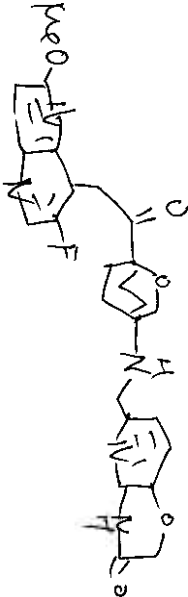



測定番号: 136-08-024  
試料名(分子量): 136-08-024(mw=523 free)  
イオン化方式: ネガティブESI+  
測定日時: 2010/06/10 12:11:40  
質量電荷比範囲: 100.00,1000.00  
イオン化モード: ネガティブESI+  
質量電荷比範囲: 100.00,1000.00  
測定日時: 2010/06/10 12:11:40  
質量電荷比範囲: 100.00,1000.00  
イオン化モード: ネガティブESI+  
質量電荷比範囲: 100.00,1000.00

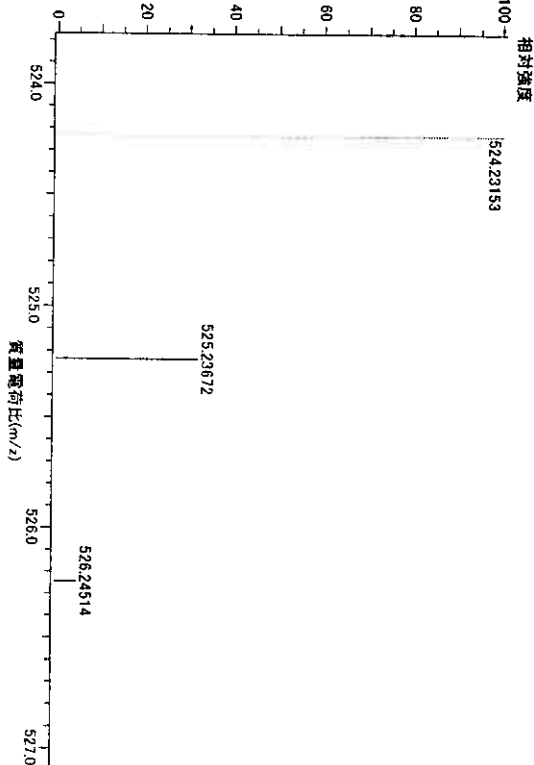

組成式:  $C_{27}H_{41}FN_3O_3$   
モノアイソトピック質量: 524.23092  
平均質量: 524.56414  
作成日時: 2010/06/10 13:51:52  
整数質量: 524  
作成者: Administrator

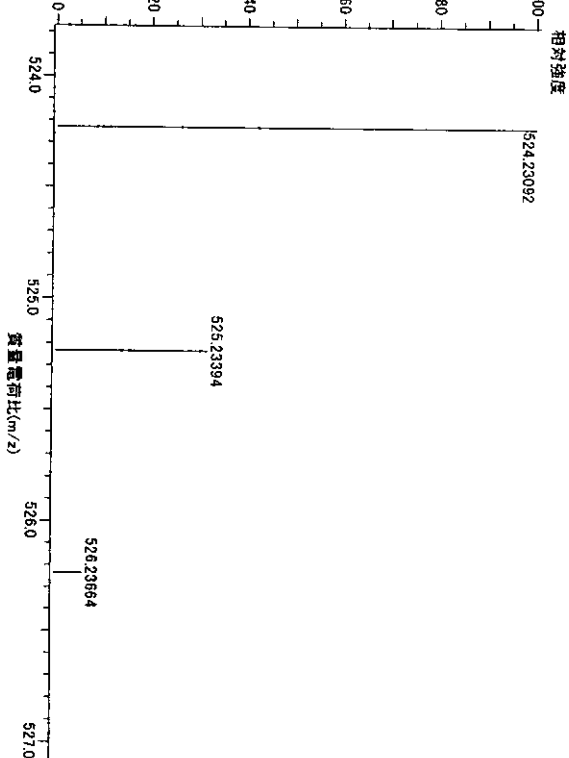

Compound (-)-6

測定日時: 2010/06/10 12:11:40  
試料名: 136-08-024  
イオン化方式: ネガティブESI+  
質量電荷比範囲: 100.00,1000.00  
測定日時: 2010/06/10 12:11:40  
質量電荷比範囲: 100.00,1000.00  
イオン化モード: ネガティブESI+  
質量電荷比範囲: 100.00,1000.00  
測定日時: 2010/06/10 12:11:40  
質量電荷比範囲: 100.00,1000.00  
イオン化モード: ネガティブESI+  
質量電荷比範囲: 100.00,1000.00

| 質量        | 強度        | 計算質量      | 質量差  | 推定組成式                                     | 不飽和数 |
|-----------|-----------|-----------|------|-------------------------------------------|------|
| 524.23151 | 395288.56 | 524.23092 | 0.61 | $^{12}C_{27}H_{41}^{15}F^{14}N_3^{16}O_3$ | 14.5 |

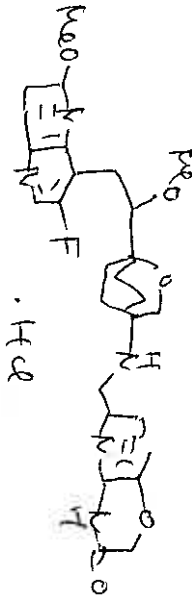

測定番号: 136-08-013  
試料名(分子数): 136-08-013(mw=508 free)  
イオン化モード: テンブルESI+  
測定日時: 2010/05/27 14:39:51  
装置構成: JMS-T100LP  
質量電荷比範囲: 100.00-1000.00  
イオン化モード: テンブルESI+  
測定日時: 2010/05/27 14:39:51

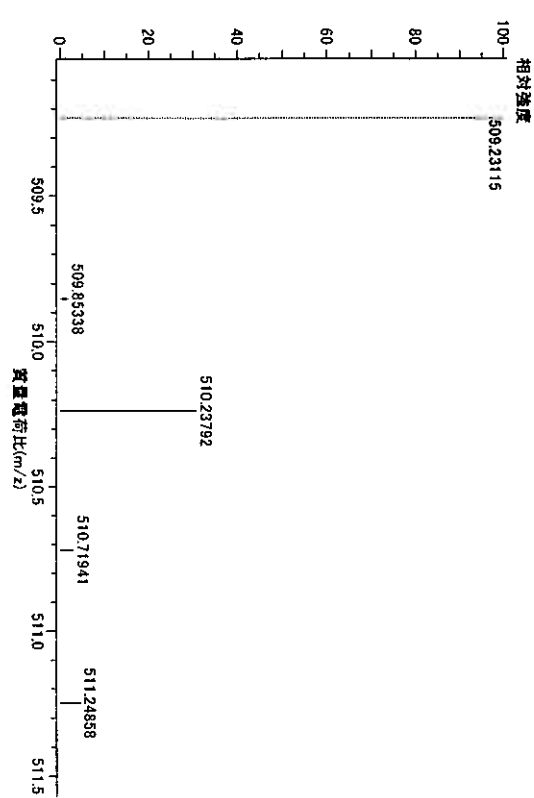

組成式: C<sub>21</sub>H<sub>25</sub>FNO<sub>4</sub>  
モノイソトピーク質量: 509.23126  
平均質量: 509.55284  
説明:  
作成日時: 2010/05/27 15:59:51  
整数質量: 509  
作成者: Administrator

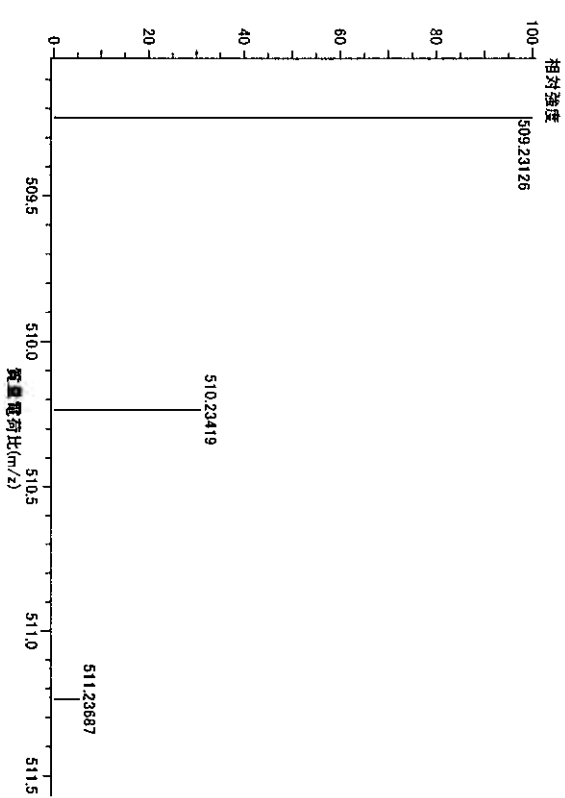

Compound (-)-10

データ: 136-08-013  
試料名: 136-08-013(mw=508 free)  
説明:  
イオン化モード: テンブルESI+  
処理履歴: m/z 補正(1.00X)平滑化(3...  
電荷数: 1  
元素: <sup>12</sup>C:0.26, <sup>1</sup>H:0.30, <sup>19</sup>F:0.1, <sup>14</sup>N:0.6, <sup>16</sup>O:0.4  
質量差: 5.00(mmu)  
不飽和数: -1.5 - 20.0 (確数: 両方)

| 質量        | 強度        | 計算質量      | 質量差   | 推定組成式                                                                                                                                            | 不飽和数 |
|-----------|-----------|-----------|-------|--------------------------------------------------------------------------------------------------------------------------------------------------|------|
| 509.23115 | 233117.25 | 509.23126 | -0.11 | <sup>12</sup> C <sub>21</sub> <sup>1</sup> H <sub>25</sub> <sup>1</sup> F <sub>1</sub> <sup>14</sup> N <sub>1</sub> <sup>16</sup> O <sub>4</sub> | 14.5 |

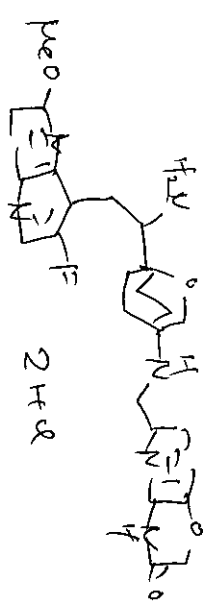

測定データ名: 136-08-012  
試料名(分子種): 136-08-012(mw=508 free)  
イオン化モード: テュアルESI+  
測定日時: 2010/05/25 13:20:13  
リソリンス電圧: 10[V]

装置構成: JMS-T100LP  
質量電圧比範囲: 100.00-1000.00  
イオン化モード: テュアルESI+  
測定日時: 2010/05/25 13:20:13

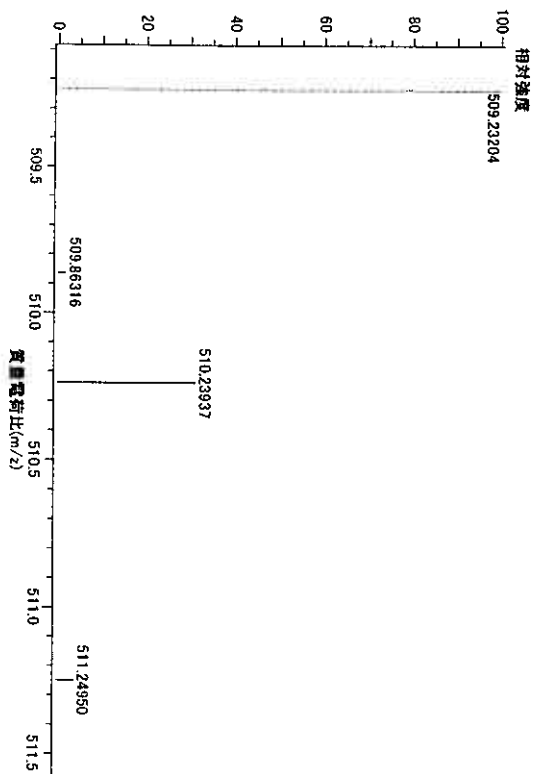

組成式:  $C_{24}H_{26}FN_2O_4$   
モノアイソトピック質量: 509.23126  
平均質量: 509.55284  
説明:

作成日時: 2010/05/25 13:57:41  
整数質量: 509  
作成者: Administrator

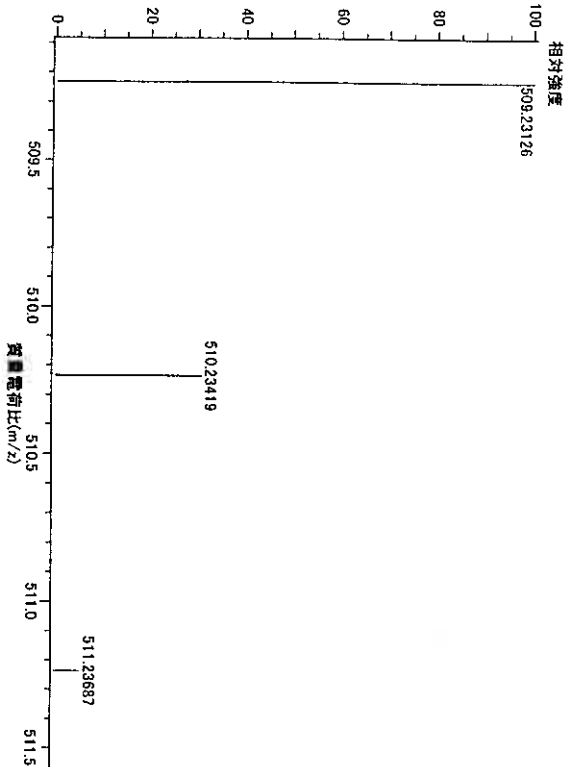

Compound (+)-10

データ: 136-08-012  
試料名: 136-08-012(mw=508 free)  
説明:  
イオン化モード: テュアルESI+  
処理履歴: m/z 軸決定 [ピーク抽出 [重心: 45 面積]: ペース補正 [10.0%] 平滑化 [5..]  
電荷数: 1  
元素:  $^{12}C_0$ , 26,  $^1H_0$ , 30,  $^{19}F_0$ , 1,  $^{14}N_0$ , 6,  $^{16}O_0$ , 4  
許容誤差: 5.00(mmu)  
不飽和数: -1.5 - 20.0 (値数: 両方)

| 質量        | 強度        | 計算質量      | 質量差<br>mmu | 推定組成式                                            | 不飽和数 |
|-----------|-----------|-----------|------------|--------------------------------------------------|------|
| 509.23204 | 194356.24 | 509.23126 | 0.79       | $^{12}C_{24}^{13}H_{26}^{19}F_1^{14}N_2^{16}O_4$ | 14.5 |

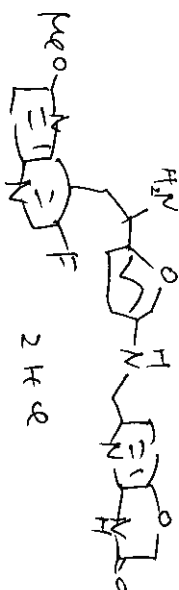

測定データ名: 136-07-069-1  
試料名(分子数): 136-07-069-1(mw=522)  
イオン化モード: テンブールESI+  
イオン化電圧: 45V  
測定日時: 2010/04/09 14:12:11  
装置構成: JMS-T100LP  
質量電圧比範囲: 100.00, 1000.00  
イオン化モード: テンブールESI+  
イオン化電圧: 2500V

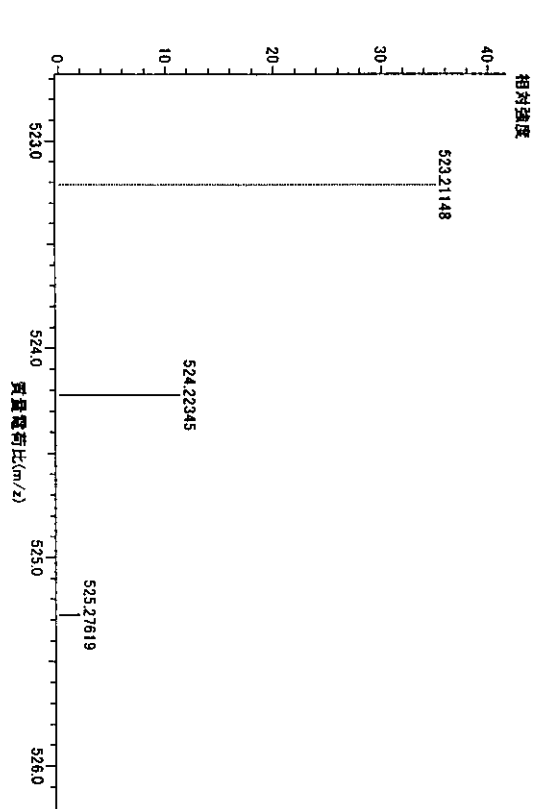

組成式: C<sub>24</sub>H<sub>28</sub>FN<sub>2</sub>O<sub>5</sub>  
モノイソトピック質量: 523.21052  
平均質量: 523.53636  
説明:  
作成日時: 2010/04/09 15:11:06  
指数質量: 523  
作成者: Administrator

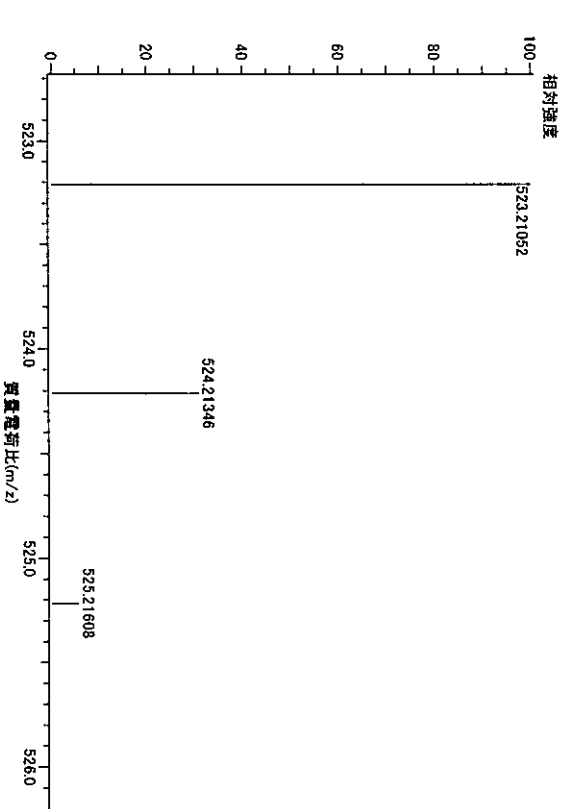

Compound 13

データ: 136-07-069-1  
試料名: 136-07-069-1(mw=522)  
説明:  
イオン化モード: テンブールESI+  
処理温度: m/z軸決定に100%抽出(重心40.0面積); ベース補正[10.0%]; 平滑化[5...  
電荷数: 1  
元素: <sup>12</sup>C: 0 - 26, <sup>1</sup>H: 0 - 28, <sup>19</sup>F: 0 - 1, <sup>14</sup>N: 0 - 6, <sup>16</sup>O: 0 - 5  
質量差: 5.00(mmu)  
不飽和数: -1.5 - 2.00 (指数: 両方)

| 質量        | 強度       | 計算質量      | 質量差                                                                                             | 推定組成式 | 不飽和数 |
|-----------|----------|-----------|-------------------------------------------------------------------------------------------------|-------|------|
| 523.21148 | 59929.99 | 523.21052 | 0.96 <sup>12</sup> C <sub>24</sub> H <sub>28</sub> F <sub>1</sub> N <sub>2</sub> O <sub>5</sub> |       | 15.5 |

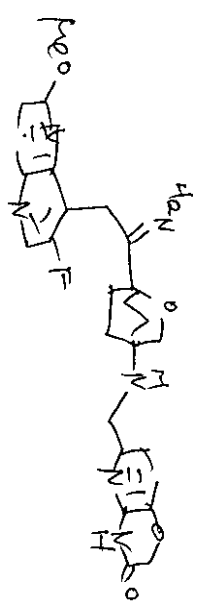

測定データ名: 136-07-069-2  
試料名(分子量): 136-07-069-2(mw=522)  
イオン化モード: デュアルESI+  
測定日時: 2010/04/16 15:01:29  
装置構成: JMS-T100LP  
質量電荷比範囲: 100.00, 1000.00  
イオン化モード: デュアルESI+  
測定日時: 2010/04/16 15:01:29

相対強度

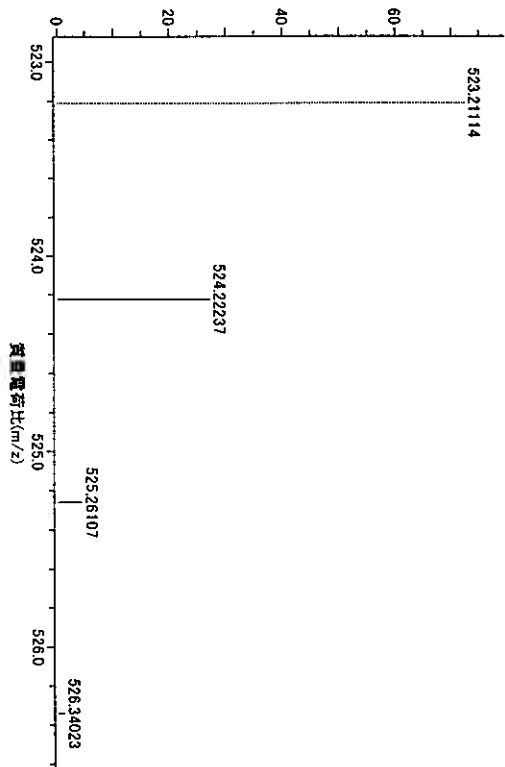

組成式:  $C_{26}H_{28}FN_2O_3$   
モノアイソトピー質量: 523.21052  
平均質量: 523.33636  
作成日時: 2010/04/16 15:15:09  
整数質量: 523  
作成者: Administrator

相対強度

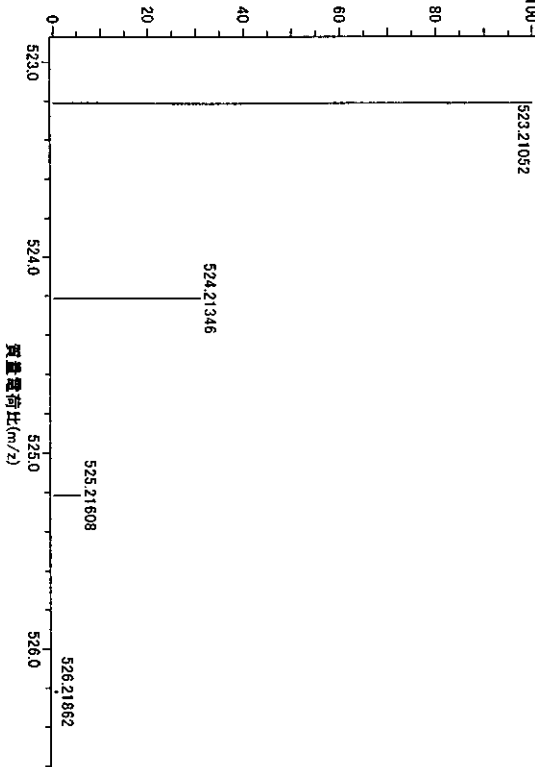

# Compound 14

データ: 136-07-069-2  
試料名: 136-07-069-2(mw=522)  
説明:  
イオン化モード: デュアルESI+  
処理履歴: m/z 掃検決定ピーク検出(中心 40.000), ベース補正(0.04), 平滑化(5.0)  
測定日時: 2010/04/16 15:01:29  
測定者: Administrator  
質量校正データ: HCOONa-Pas  
作成日時: 2010/04/16 15:15:08  
作成者: Administrator

電荷数: 1  
許容誤差: 5.00(mmu)  
元素:  $^{12}C_0.26$ ,  $^1H_0.28$ ,  $^{19}F_0.1$ ,  $^{14}N_0.6$ ,  $^{16}O_0.5$   
不飽和数: -1.5 - 20.0 (端数: 両方)

| 質量        | 強度       | 計算質量      | 質量差<br>mmu | 推定組成式                                          | 不飽和数 |
|-----------|----------|-----------|------------|------------------------------------------------|------|
| 523.21114 | 58518.55 | 523.21052 | 0.61       | $^{12}C_{26}^{14}H_{28}^{19}F^{14}N_2^{16}O_3$ | 15.5 |

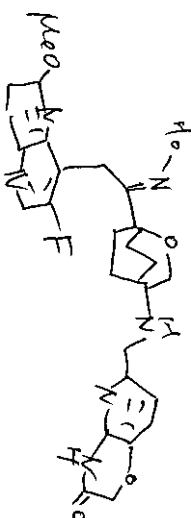

Compound 15

測定データ名: 136-08-005  
試料名: 136-08-005(mw=536 free)  
イオン化モード: エレクトロスプレー  
測定日時: 2010/05/27 14:52:07  
リソグレンス電圧: 100V

装置構成: JMS-T100LP  
質量電圧範囲: 100.00, 1000.00  
イオン化モード: エレクトロスプレー  
質量電圧: 2500V

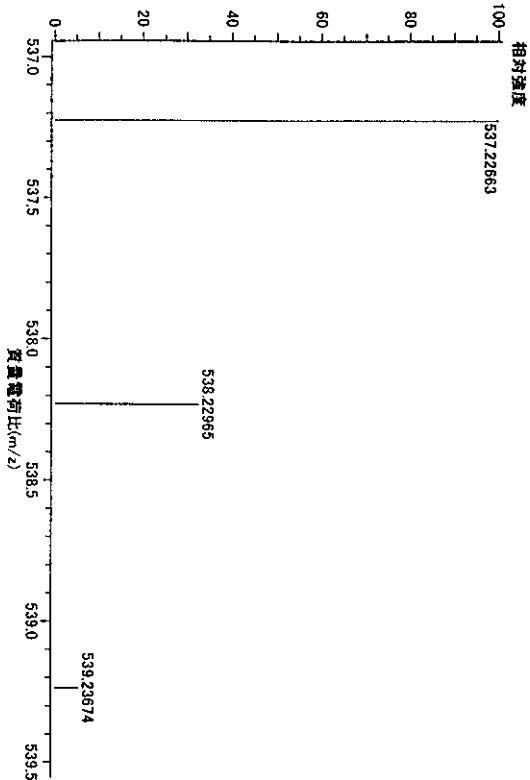

組成式:  $C_{21}H_{26}FNO_3$   
モノイソトピック質量: 537.22617  
平均質量: 537.56294  
説明:

作成日時: 2010/05/27 16:08:07  
添数質量: 537  
作成者: Administrator

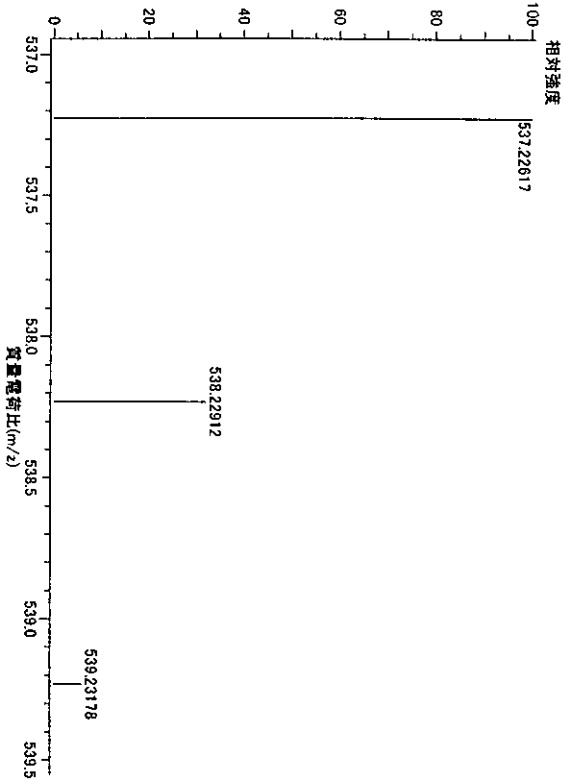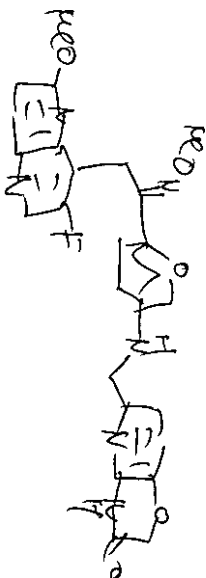

データ: 136-08-005  
試料名: 136-08-005(mw=536 free)  
説明:  
イオン化モード: エレクトロスプレー  
処理履歴: m/z 軸決定 [ピーク検出 [重心: 50 面積] ベース補正 [10.0%] 平滑化 [5...]  
電荷数: 1  
元素:  $^{12}C_0$  - 27,  $^1H_0$  - 30,  $^{19}F_0$  - 1,  $^{14}N_0$  - 6,  $^{16}O_0$  - 5  
許容誤差: 5.00 (mmu)  
不飽和数: -1.5 - 20.0 (検数: 両方)

| 質量        | 強度         | 計算質量      | 質量差<br>mmu                                       | 推定組成式 | 不飽和数 |
|-----------|------------|-----------|--------------------------------------------------|-------|------|
| 537.22663 | 1704703.87 | 537.22617 | 0.46 $^{12}C_{21}H_{26}^{19}F_1^{14}N_1^{16}O_3$ |       | 15.5 |

測定データ名: 136-09-063  
試料名(分子量): 136-09-063(mw=509)  
イオン化モード: テンブリス+  
オリエンタ1電圧: 45V  
測定日時: 2010/11/24 11:01:56  
装置構成: JMS-T100LP  
質量電荷比範囲: 100.00, 1000.00  
イオン化モード: テンブリス+  
オリエンタ1電圧: 2500V

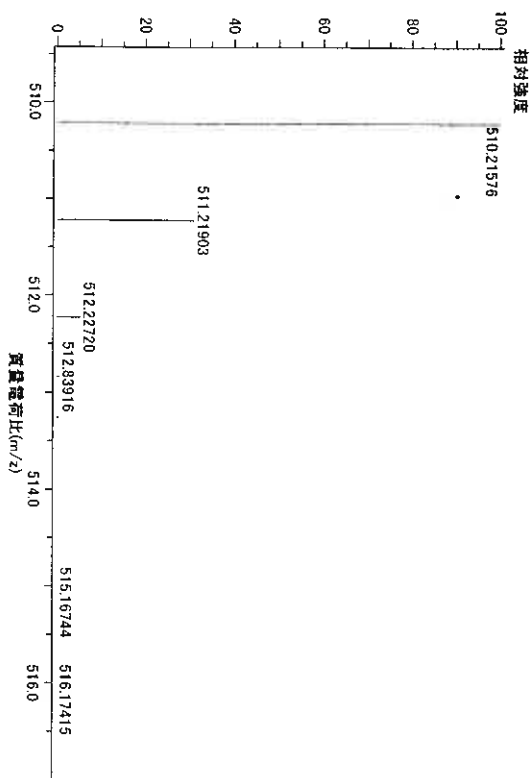

組成式: C<sub>24</sub>H<sub>35</sub>F<sub>3</sub>N<sub>3</sub>O<sub>5</sub>  
モノアイソトピック質量: 510.21527  
平均質量: 510.33756  
作成日時: 2010/11/24 11:16:59  
整数質量: 510  
作成者: Administrator

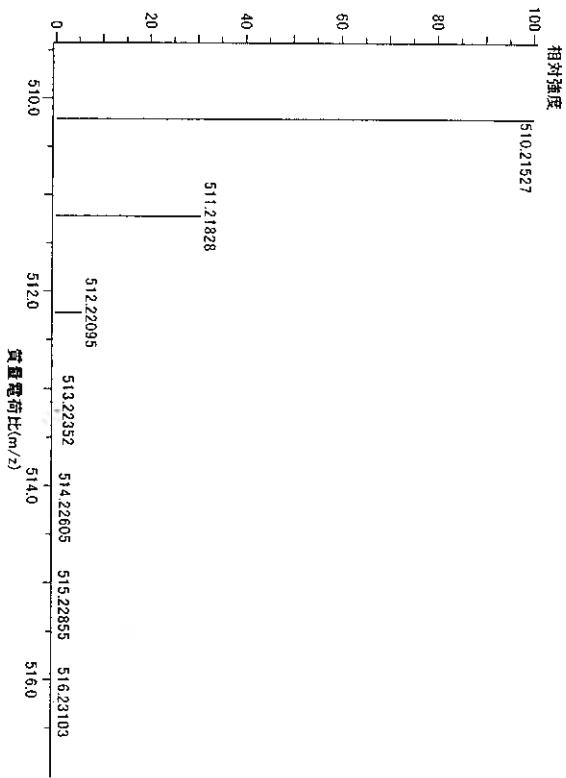

Compound (-)-19

データ: 136-09-063  
試料名: 136-09-063(mw=509)  
説明: テンブリス+  
オリエンタ1電圧: 45V  
測定日時: 2010/11/24 11:01:56  
装置構成: JMS-T100LP  
質量電荷比範囲: 100.00, 1000.00  
イオン化モード: テンブリス+  
オリエンタ1電圧: 2500V

| 質量        | 強度        | 計算質量      | 質量差  | 推定組成式                                                                        | 不飽和数 |
|-----------|-----------|-----------|------|------------------------------------------------------------------------------|------|
| 510.21576 | 914834.20 | 510.21527 | 0.49 | C <sub>24</sub> H <sub>35</sub> F <sub>3</sub> N <sub>3</sub> O <sub>5</sub> | 14.5 |

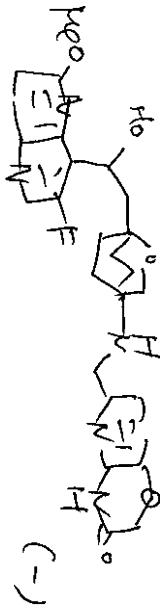

測定データ名: 136-09-062  
 試料名: 136-09-062(mw=509)  
 イオン化モード: デュアルESI+  
 オフガス1電圧: 45V  
 測定日時: 2010/11/24 10:49:41

リンゲレンス電圧: 100V

装置構成: JMS-T100LP

質量電荷比範囲: 100.00, 1000.00  
 イオン化モード: デュアルESI+  
 オフガス1電圧: 2500V

相対強度

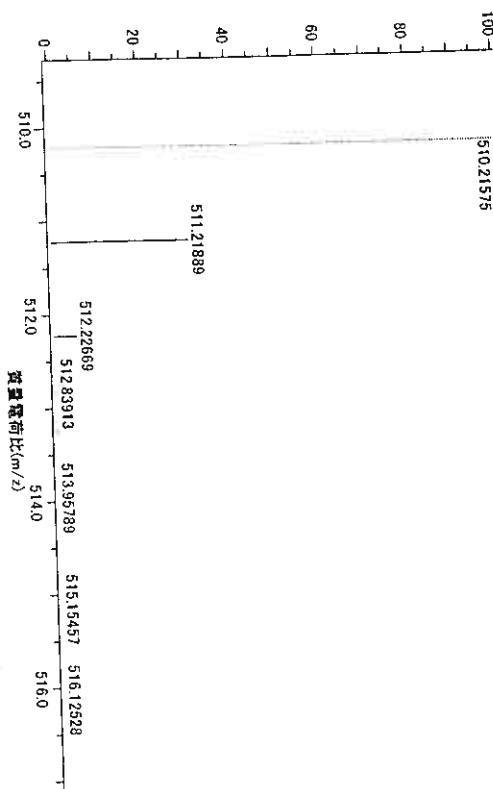

組成式: C<sub>24</sub>H<sub>27</sub>NO<sub>5</sub>  
 モノアイソビツク質量 510.21527  
 説明:

平均質量: 510.53756

作成日時: 2010/11/24 11:15:13  
 登録者: Administrator

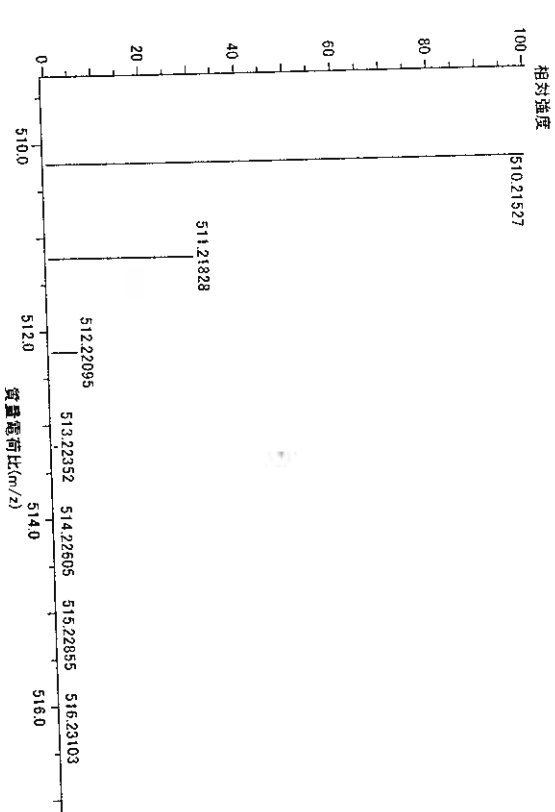

Compound (+)-19

データ: 136-09-062

試料名: 136-09-062(mw=509)

説明:

イオン化モード: デュアルESI+

処理履歴: m/z検定[ピーク検出(重心, 40面積)]>ピーク補正[20.0%]>平滑化[5...

電荷数: 1

元素: C: 26, H: 29, N: 1, O: 5

質量差: 5.00(mmu)

| 質量        | 強度       | 計算質量      | 質量差  | 推定組成式                                                         | 不飽和数 |
|-----------|----------|-----------|------|---------------------------------------------------------------|------|
| 510.21575 | 97844052 | 510.21527 | 0.48 | C <sub>24</sub> H <sub>27</sub> N <sub>1</sub> O <sub>5</sub> | 14.5 |

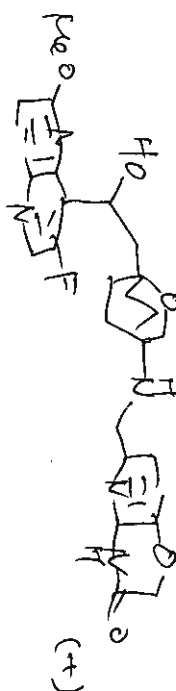

測定日時: 2010/11/24 10:49:41  
 測定者: Administrator  
 質量校正データ: HCOONa-Pos  
 作成日時: 2010/11/24 11:15:13  
 作成者: Administrator

不飽和数: 14.5 .. 20.0 (補正: 両方)



測定イオン名: 144-3-025  
試料名 (分子数): 144-3-025(mw=525 free)  
イオン化モード: デュアルESI+  
測定日時: 2009/12/07 12:28:12  
装置構成: JMS-T100LP  
質量電荷比範囲: 100.00-1000.00  
イオン化モード: デュアルESI+  
測定日時: 2009/12/07 12:28:12  
質量電荷比範囲: 100.00-1000.00  
イオン化モード: デュアルESI+  
測定日時: 2009/12/07 12:28:12

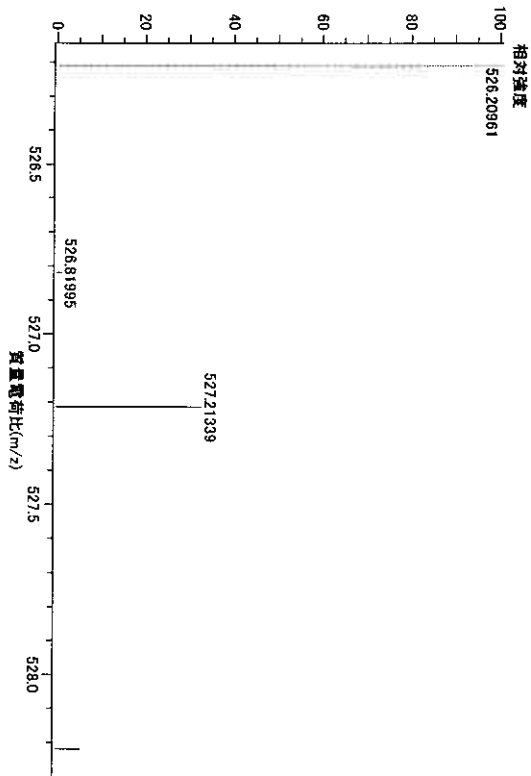

組成式: C<sub>24</sub>H<sub>25</sub>N<sub>5</sub>O<sub>6</sub>  
モノアイソトピック質量: 526.21019  
平均質量: 526.53696  
説明:  
作成日時: 2009/12/07 13:21:24  
登録質量: 526  
作成者: Administrator

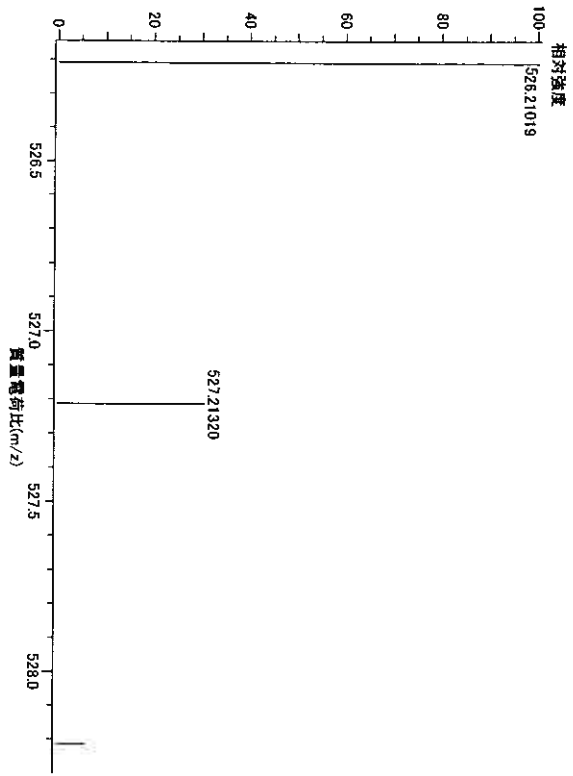

イオン: 144-3-025  
試料名: 144-3-025(mw=525 free)  
説明:  
イオン化モード: デュアルESI+  
処理履歴: m/z 補決定に10%検出率, 10%補正 [10.00%] 平滑化...  
電荷数: 1  
質量: 144.3025 (amu)  
元素: C<sub>24</sub>H<sub>25</sub>N<sub>5</sub>O<sub>6</sub>  
質量差: 5.000 (amu)  
推定組成式: C<sub>24</sub>H<sub>25</sub>N<sub>5</sub>O<sub>6</sub>  
不飽和数: 15.200 (数値: 両方)

| 質量        | 強度        | 計算質量      | 質量差   | 推定組成式                                                         | 不飽和数 |
|-----------|-----------|-----------|-------|---------------------------------------------------------------|------|
| 526.20961 | 741794.41 | 526.21019 | -0.58 | C <sub>24</sub> H <sub>25</sub> N <sub>5</sub> O <sub>6</sub> | 14.5 |

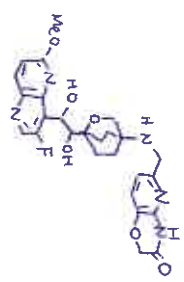

Compound (+)-24

測定データ名: 144-3-026  
試料名 (分子重): 144-3-026(mw=525 free)  
イオン化モード: テュアルESI+  
オリゲニス電圧: 45V  
測定日時: 2009/12/07 12:15:55  
装置構成: JMS-T100LP  
質量電荷比範囲: 100.00, 1000.00  
イオン化モード: テュアルESI+  
オリゲニス電圧: 2500V

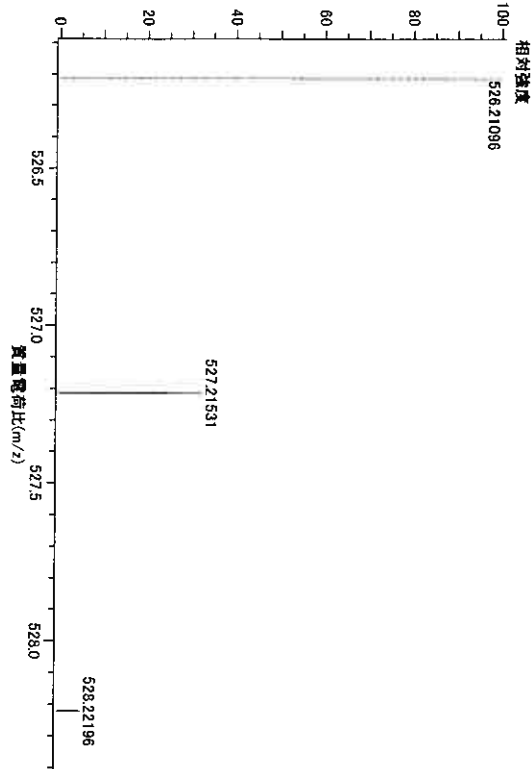

組成式: C<sub>21</sub>H<sub>19</sub>FN<sub>3</sub>O<sub>4</sub>  
モノアイソトピック質量: 526.21019  
平均質量: 526.53696  
説明:  
作成日時: 2009/12/07 13:18:40  
登録質量: 526  
作成者: Administrator

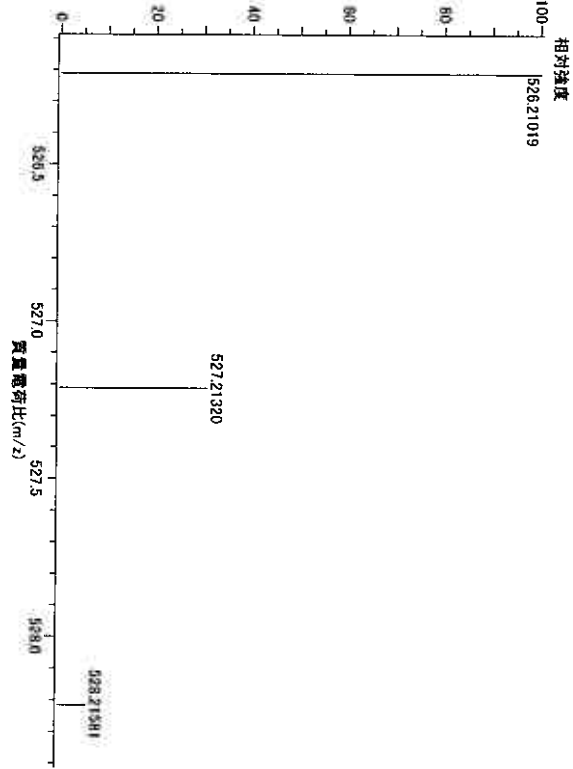

データ: 144-3-026  
試料名: 144-3-026(mw=525 free)  
説明:  
イオン化モード: テュアルESI+  
処理電圧: m/z決定ビーム射出(電圧:20面積),ペーア補正[0.0%],平滑化..  
電荷数: 1  
元素: C<sub>21</sub>H<sub>19</sub>O<sub>4</sub>N<sub>3</sub>F  
計算誤差: 5.00(mmu)  
測定日時: 2009/12/07 12:15:55  
測定者: Administrator  
質量校正データ: TFAms ESI+ 1000  
作成日時: 2009/12/07 13:18:39  
作成者: Administrator  
不飽和数: -15.200 (端数:両方)

| 質量        | 強度       | 計算質量      | 質量差<br>mmu | 推定組成式                                                          | 不飽和数 |
|-----------|----------|-----------|------------|----------------------------------------------------------------|------|
| 526.21096 | 49305765 | 526.21019 | 0.77       | C <sub>21</sub> H <sub>19</sub> FN <sub>3</sub> O <sub>4</sub> | 14.5 |

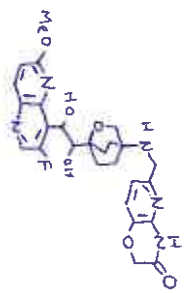

測定データ名: 144-3-036  
試料名 (分子数): 144-3-036(mw=551 free)  
イオン化モード: テンブレス+  
オリエンタ電圧: 45V  
測定日時: 2009/12/18 14:47:23  
装置構成: JMS-T100LP  
質量電圧範囲: 100.00, 1000.00  
イオン化モード: テンブレス+  
オリエンタ電圧: 2500V

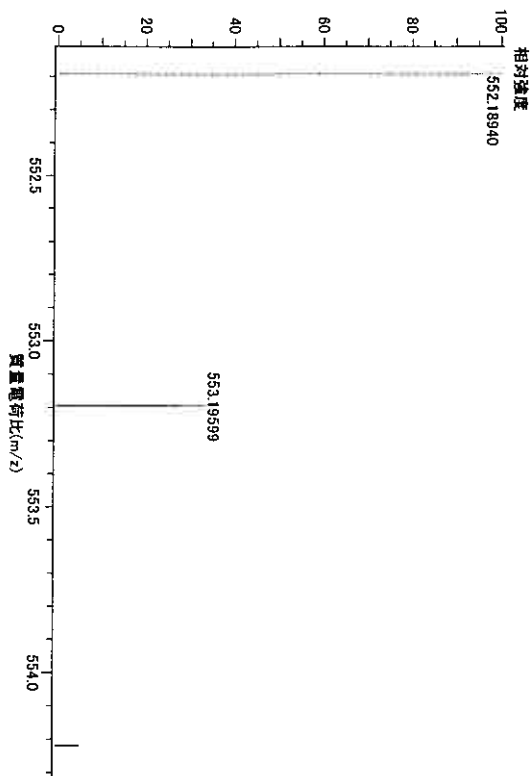

組成式:  $C_{27}H_{27}FNO_3$   
モノイソトピック質量: 552.18945  
平均質量: 552.53118  
説明:  
作成日時: 2009/12/18 15:09:28  
整合質量: 552  
作成者: Administrator

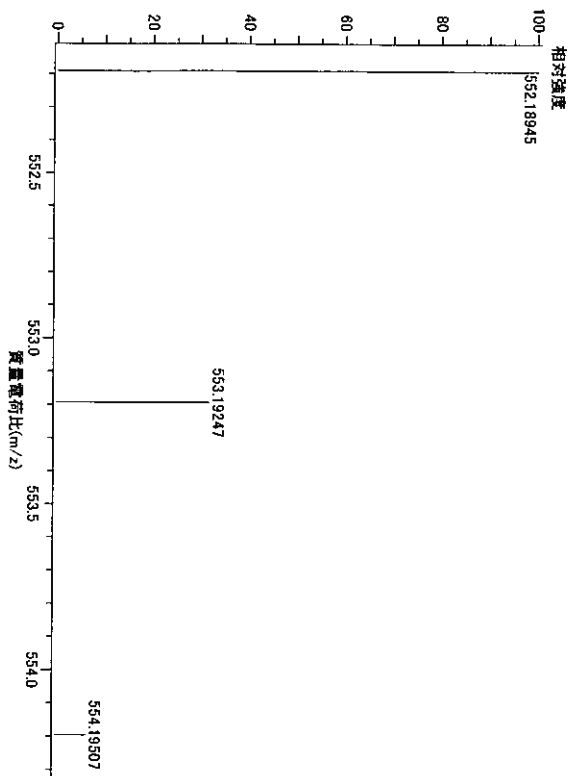

Compound (-)-25

データ: 144-3-036  
試料名: 144-3-036(mw=551 free)  
説明:  
イオン化モード: テンブレス+  
処理履歴: m/z補決定ピーク検出 (心: 3.5 面積) ベース補正 (10.0%) 平滑化  
電荷数: 1  
元素:  $^{12}C_0$  . 27,  $^1H_0$  . 27,  $^{19}F_0$  . 1,  $^{14}N_0$  . 5,  $^{16}O_0$  . 7  
許容誤差: 5.00 (mmu)  
測定日時: 2009/12/18 14:47:23  
測定者: Administrator  
質量校正データ: TFA-NE-ESI+ 1000  
作成日時: 2009/12/18 15:09:27  
作成者: Administrator  
不飽和数: 15 - 20.0 (端数: 両方)

| 質量        | 強度        | 計算質量      | 質量差<br>mmu | 推定組成式                   | 不飽和数 |
|-----------|-----------|-----------|------------|-------------------------|------|
| 552.18940 | 647251.26 | 552.18945 | -0.05      | $C_{27}H_{27}F_1N_5O_7$ | 16.5 |

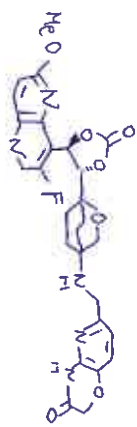

測定データ名: 144-3-040  
試料名: 144-3-040(mw=551 free)  
イオン化モード: テンブレス+  
測定日時: 2009/12/28 13:16:05  
リンドレンス電圧: 10[V]  
質量校正範囲: 100.00-1000.00  
イオン化モード: テンブレス+  
測定日時: 2009/12/28 13:16:05  
リンドレンス電圧: 10[V]  
質量校正範囲: 100.00-1000.00  
イオン化モード: テンブレス+  
測定日時: 2009/12/28 13:16:05  
リンドレンス電圧: 10[V]  
質量校正範囲: 100.00-1000.00

相対強度

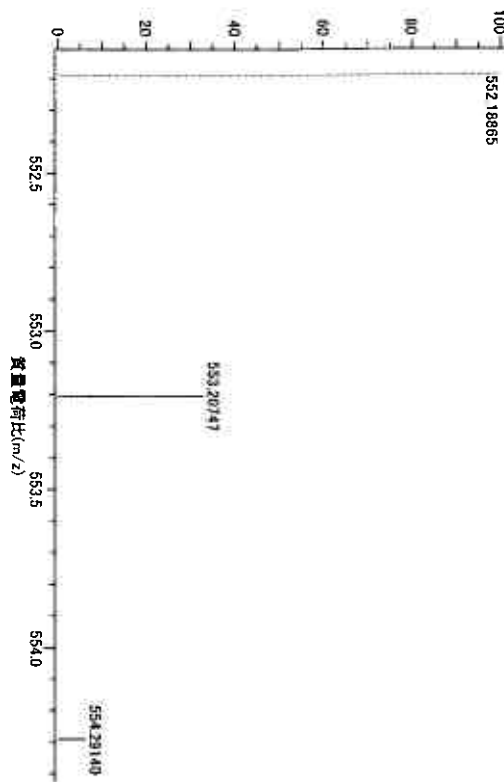

組成式:  $C_{27}H_{40}FNO_7$   
モ/アノビッラ質量: 552.18945  
平均質量: 552.53118  
作成日時: 2009/12/28 14:19:37  
校正質量: 552  
作成者: Administrator

相対強度

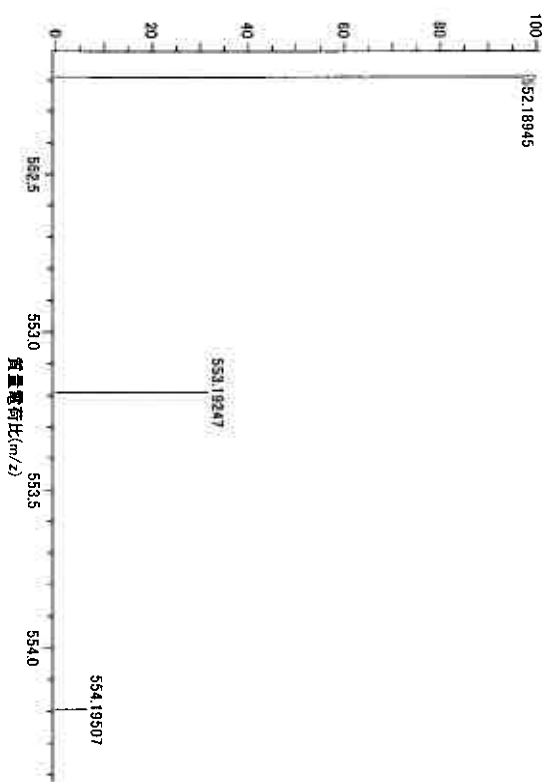

Compound (+)-25

データ: 144-3-040  
試料名: 144-3-040(mw=551 free)  
説明: テンブレス+  
処理履歴: m/z 検出中心: 45 (面積) / へーノ補正 [10.0%] 平滑化 [...]  
電荷数: 1  
元素:  $^{12}C_{27}$ ,  $^{1}H_{40}$ ,  $^{19}F_1$ ,  $^{14}N_1$ ,  $^{16}O_7$   
許容誤差: 5.00 (mmu)  
測定日時: 2009/12/28 13:16:05  
測定者: Administrator  
質量校正データ: 144-3-040, ES+ 1000  
作成日時: 2009/12/28 14:19:37  
作成者: Administrator  
不飽和数: -1.5, 20.0 (端数: 両方)

| 質量        | 強度       | 計算質量      | 質量差<br>mmu | 推定組成式                                           | 不飽和数 |
|-----------|----------|-----------|------------|-------------------------------------------------|------|
| 552.18865 | 100.0000 | 552.18945 | -0.80      | $^{12}C_{27}^{1}H_{40}^{19}F_1^{14}N_1^{16}O_7$ | 16.5 |

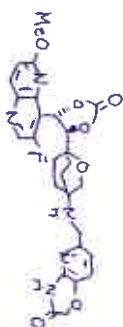

Compound 5

元素分析報告書

|                                                                                                         |                                                                |      |       |                 |                    |   |        |
|---------------------------------------------------------------------------------------------------------|----------------------------------------------------------------|------|-------|-----------------|--------------------|---|--------|
| 氏名                                                                                                      | 柴田 威殿                                                          |      | 申込日   | 2010 年 3 月 29 日 |                    |   |        |
| 物質名                                                                                                     | 136-07-062                                                     |      |       |                 |                    |   |        |
| 分子式                                                                                                     | C <sub>26</sub> H <sub>12</sub> FN <sub>5</sub> O <sub>5</sub> |      |       |                 | KCL No.            |   |        |
| 構造式 (又ハ、分子式・含有元素名)<br>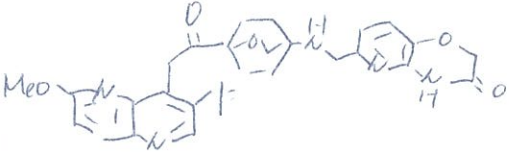 |                                                                |      |       |                 | M. P. : 183-188 °C |   |        |
|                                                                                                         |                                                                |      |       |                 | B. P. :            |   |        |
|                                                                                                         |                                                                |      |       |                 | 昇華性 :              |   |        |
|                                                                                                         |                                                                |      |       |                 | 吸湿性 :              |   |        |
|                                                                                                         | C                                                              | H    | N     | O               | S                  | X | M·W    |
| calcd (%)                                                                                               | 61.53                                                          | 5.16 | 13.80 |                 |                    |   | 507.51 |
| found (%)                                                                                               | 59.15                                                          | 5.13 | 12.91 |                 |                    |   |        |
| 分析後の所見. 分析日付<br>3/29 H. Ohashi                                                                          |                                                                |      |       |                 | Note No.           |   |        |
|                                                                                                         |                                                                |      |       |                 | 分析番号 : 445         |   |        |

杏林製薬(株) 創薬研究所

## Compound (-)-6

## 元素分析報告書

|                                                                                                                                     |                                                                      |      |       |            |                             |   |        |
|-------------------------------------------------------------------------------------------------------------------------------------|----------------------------------------------------------------------|------|-------|------------|-----------------------------|---|--------|
| 氏名                                                                                                                                  | 柴田 威殿                                                                |      | 申込日   | 2010年6月10日 |                             |   |        |
| 物質名                                                                                                                                 | 136-08-024                                                           |      |       |            |                             |   |        |
| 分子式                                                                                                                                 | C <sub>27</sub> H <sub>30</sub> FN <sub>5</sub> O <sub>3</sub> · HCl |      |       |            | KCL No.                     |   |        |
| 構造式 (又ハ、分子式・含有元素名)<br>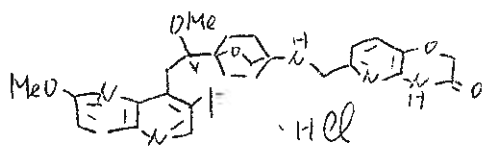<br>0.64120 56.81 5.69 12.27 |                                                                      |      |       |            | M. P. : 219-220°C (decolor) |   |        |
|                                                                                                                                     |                                                                      |      |       |            | B. P. :                     |   |        |
|                                                                                                                                     |                                                                      |      |       |            | 昇華性:                        |   |        |
|                                                                                                                                     |                                                                      |      |       |            | 吸湿性:                        |   |        |
|                                                                                                                                     | C                                                                    | H    | N     | O          | S                           | X | M·W    |
| calcd (%)                                                                                                                           | 57.91                                                                | 5.58 | 12.51 |            |                             |   | 560.02 |
| found (%)                                                                                                                           | 56.55                                                                | 5.50 | 12.18 |            |                             |   | 570.83 |
| 分析後の所見, 分析日付<br>6/10 0.67<br>2-3 4-14 7-21 73 H Ohashi                                                                              |                                                                      |      |       |            | Note No.                    |   |        |
|                                                                                                                                     |                                                                      |      |       |            | 分析番号: 1075                  |   |        |

(5.5753)  
57.00.2.9+6 0.512 杏林製薬㈱ 創薬研究所

Compound (-)-10

元素分析報告書

|                                                                                                         |                                    |      |       |      |            |      |        |
|---------------------------------------------------------------------------------------------------------|------------------------------------|------|-------|------|------------|------|--------|
| 氏 名                                                                                                     | 柴 田 威 殿                            |      | 申 日   | 2010 | 年          | 5月27 | 日      |
| 物 質 名                                                                                                   | 136-08-013                         |      |       |      |            |      |        |
| 分 子 式                                                                                                   | $C_{26}H_{29}F_2N_2O_4 \cdot 2HCl$ |      |       |      | KCL No.    |      |        |
| 構造式 (又ハ、分子式・含有元素名)<br>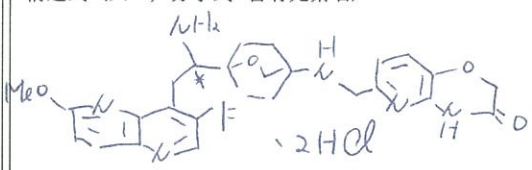 |                                    |      |       |      | M. P. :    |      |        |
|                                                                                                         |                                    |      |       |      | B. P. :    |      |        |
|                                                                                                         |                                    |      |       |      | 昇 華 性 :    |      |        |
|                                                                                                         |                                    |      |       |      | 吸 湿 性 :    |      |        |
|                                                                                                         | C                                  | H    | N     | O    | S          | X    | M·W    |
| calcd (%)                                                                                               | 53.71                              | 5.37 | 14.45 |      |            |      | 581.87 |
| found (%)                                                                                               | 48.36                              | 5.41 | 12.88 |      |            |      |        |
| 分析後の所見. 分析日付                                                                                            |                                    |      |       |      | Note No.   |      |        |
|                                                                                                         |                                    |      |       |      | 分析番号 : 910 |      |        |
| 5/27                                                                                                    |                                    |      |       |      | H. Ohashi  |      |        |

杏林製薬(株) 創薬研究所

Compound (+)-10

元素分析報告書

|                                                                                                         |                                                                       |      |       |                               |   |   |        |
|---------------------------------------------------------------------------------------------------------|-----------------------------------------------------------------------|------|-------|-------------------------------|---|---|--------|
| 氏 名                                                                                                     | 柴 田 威 殿                                                               |      | 申 込 日 | 2010 年 5 月 25 日               |   |   |        |
| 物 質 名                                                                                                   | 136-08-012                                                            |      |       |                               |   |   |        |
| 分 子 式                                                                                                   | C <sub>26</sub> H <sub>12</sub> FN <sub>2</sub> O <sub>4</sub> · 2HCl |      |       | KCL No.                       |   |   |        |
| 構造式 (又ハ、分子式・含有元素名)<br>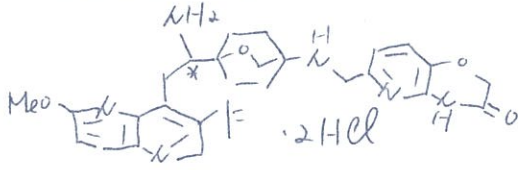 |                                                                       |      |       | M. P. : 234-235 °, (decomp.). |   |   |        |
|                                                                                                         |                                                                       |      |       | B. P. :                       |   |   |        |
|                                                                                                         |                                                                       |      |       | 昇 華 性 :                       |   |   |        |
|                                                                                                         |                                                                       |      |       | 吸 湿 性 :                       |   |   |        |
|                                                                                                         |                                                                       |      |       |                               |   |   |        |
|                                                                                                         | C                                                                     | H    | N     | O                             | S | X | M·W    |
| calcd (%)                                                                                               | 53.71                                                                 | 5.37 | 14.45 |                               |   |   | 581.47 |
| found (%)                                                                                               | 50.18                                                                 | 5.41 | 13.31 |                               |   |   |        |
| 分析後の所見. 分析日付<br>5/25                                                                                    |                                                                       |      |       | Note No.                      |   |   |        |
|                                                                                                         |                                                                       |      |       | 分析番号 : 872                    |   |   |        |

杏林製薬(株) 創薬研究所



Compound 13

元素分析報告書

|                                                                                                                      |                                                                              |      |       |                |                         |   |        |
|----------------------------------------------------------------------------------------------------------------------|------------------------------------------------------------------------------|------|-------|----------------|-------------------------|---|--------|
| 氏 名                                                                                                                  | 嵯 田 威 殿                                                                      |      | 申 日   | 2010 年 4 月 9 日 |                         |   |        |
| 物質名                                                                                                                  | 136-07-069-1                                                                 |      |       |                |                         |   |        |
| 分子式                                                                                                                  | C <sub>26</sub> H <sub>27</sub> F <sub>2</sub> N <sub>6</sub> O <sub>5</sub> |      |       |                | KCL No.                 |   |        |
| 構造式 (又ハ, 分子式・含有元素名)<br>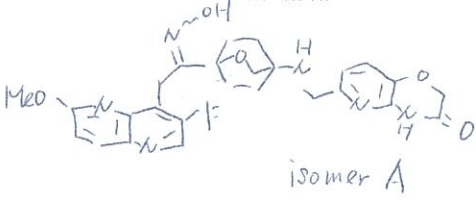<br>isomer A |                                                                              |      |       |                | M. P. : 1910            |   |        |
|                                                                                                                      |                                                                              |      |       |                | B. P. :                 |   |        |
|                                                                                                                      |                                                                              |      |       |                | 昇 華 性 :                 |   |        |
|                                                                                                                      |                                                                              |      |       |                | 吸 湿 性 :                 |   |        |
|                                                                                                                      | C                                                                            | H    | N     | O              | S                       | X | M·W    |
| calcd (%)                                                                                                            | 59.76                                                                        | 5.21 | 16.08 |                |                         |   | 522.53 |
| found (%)                                                                                                            | 59.04                                                                        | 5.19 | 15.78 |                |                         |   |        |
| 分析後の所見, 分析日付<br>4/9                                                                                                  |                                                                              |      |       |                | Note No.                |   |        |
|                                                                                                                      |                                                                              |      |       |                | 分析番号 : 554<br>H. Ohashi |   |        |

杏林製薬(株) 創薬研究所

Compound 14

元素分析報告書

|                                                                                                                     |                                                                |      |                   |                |            |   |        |
|---------------------------------------------------------------------------------------------------------------------|----------------------------------------------------------------|------|-------------------|----------------|------------|---|--------|
| 氏 名                                                                                                                 | 柴 田 威 殿                                                        |      | 申 日               | 2010 年 4 月 9 日 |            |   |        |
| 物 質 名                                                                                                               | 136-07-069-2                                                   |      |                   |                |            |   |        |
| 分 子 式                                                                                                               | C <sub>26</sub> H <sub>27</sub> FN <sub>6</sub> O <sub>5</sub> |      | KCL No. 201000637 |                |            |   |        |
| 構造式 (又ハ、分子式・含有元素名)<br>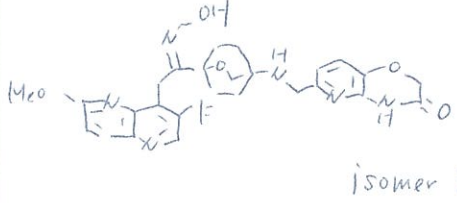<br>isomer B |                                                                |      | M. P. : 288 °C    |                |            |   |        |
|                                                                                                                     |                                                                |      | B. P. :           |                |            |   |        |
|                                                                                                                     |                                                                |      | 昇 華 性 :           |                |            |   |        |
|                                                                                                                     |                                                                |      | 吸 湿 性 :           |                |            |   |        |
|                                                                                                                     |                                                                |      |                   |                |            |   |        |
|                                                                                                                     | C                                                              | H    | N                 | O              | S          | X | M·W    |
| calcd (%)                                                                                                           | 59.76                                                          | 5.21 | 16.08             |                |            |   | 522.53 |
| found (%)                                                                                                           | 59.20                                                          | 5.26 | 15.70             |                |            |   |        |
| 分析後の所見. 分析日付                                                                                                        |                                                                |      | AM-1207           |                | Note No.   |   |        |
| 4/13                                                                                                                |                                                                |      | H. Ohashi         |                | 分析番号 : 575 |   |        |

杏林製薬(株) 創薬研究所

Compound 15

元素分析報告書

|                        |                                                                |      |       |                 |            |   |        |
|------------------------|----------------------------------------------------------------|------|-------|-----------------|------------|---|--------|
| 氏 名                    | 柴田 威 殿                                                         |      | 申 込 日 | 2010 年 5 月 27 日 |            |   |        |
| 物 質 名                  | 136-08-005                                                     |      |       |                 |            |   |        |
| 分 子 式                  | C <sub>27</sub> H <sub>19</sub> FN <sub>6</sub> O <sub>5</sub> |      |       |                 | KCL No.    |   |        |
| 構造式 (又ハ、分子式・含有元素名)<br> |                                                                |      |       |                 | M. P. :    |   |        |
|                        |                                                                |      |       |                 | B. P. :    |   |        |
|                        |                                                                |      |       |                 | 昇 華 性 :    |   |        |
|                        |                                                                |      |       |                 | 吸 湿 性 :    |   |        |
|                        | C                                                              | H    | N     | O               | S          | X | M·W    |
| calcd (%)              | 60.44                                                          | 5.45 | 15.66 |                 |            |   | 536.55 |
| found (%)              | 60.29                                                          | 5.44 | 15.73 |                 |            |   |        |
| 分析後の所見. 分析日付<br>5/27   |                                                                |      |       |                 | Note No.   |   |        |
|                        |                                                                |      |       |                 | 分析番号 : 909 |   |        |

杏林製薬(株) 創薬研究所

## Compound (-)-19

## 元素分析報告書

|                                                                                                         |                     |      |       |                  |                           |   |        |
|---------------------------------------------------------------------------------------------------------|---------------------|------|-------|------------------|---------------------------|---|--------|
| 氏 名                                                                                                     | 柴田 威 殿              |      | 申 日   | 2010 年 11 月 28 日 |                           |   |        |
| 物 質 名                                                                                                   | 136-09-063          |      |       |                  |                           |   |        |
| 分 子 式                                                                                                   | $C_{26}H_{28}FNO_5$ |      |       |                  | KCL No.                   |   |        |
| 構造式 (又ハ、分子式・含有元素名)<br>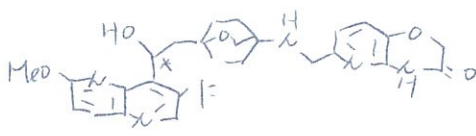 |                     |      |       |                  | M. P. : 125 ° (from Lit.) |   |        |
|                                                                                                         |                     |      |       |                  | B. P. :                   |   |        |
|                                                                                                         |                     |      |       |                  | 昇 華 性 :                   |   |        |
|                                                                                                         |                     |      |       |                  | 吸 湿 性 :                   |   |        |
|                                                                                                         | C                   | H    | N     | O                | S                         | X | M·W    |
| calcd (%)                                                                                               | 61.29               | 5.54 | 13.74 |                  |                           |   | 509.50 |
| found (%)                                                                                               | 59.37               | 5.50 | 13.14 |                  |                           |   |        |
| 分析後の所見, 分析日付<br>0.35<br>Found<br>4nd<br>11/24                                                           |                     |      |       |                  | Note No.<br>分析番号: 1922    |   |        |
| H. Ohashi                                                                                               |                     |      |       |                  |                           |   |        |

杏林製薬(株) 創薬研究所

## Compound (+)-19

## 元素分析報告書

|                                                                                                         |                                                                |      |       |                           |     |            |
|---------------------------------------------------------------------------------------------------------|----------------------------------------------------------------|------|-------|---------------------------|-----|------------|
| 氏 名                                                                                                     | 柴田 威 殿                                                         |      | 申 日   | 2010 年 11 月 28 日          | 込 付 |            |
| 物 質 名                                                                                                   | 136-09-062                                                     |      |       |                           |     |            |
| 分 子 式                                                                                                   | C <sub>26</sub> H <sub>28</sub> FN <sub>5</sub> O <sub>5</sub> |      |       | KCL No.                   |     |            |
| 構造式 (又ハ、分子式・含有元素名)<br>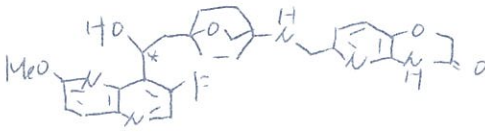 |                                                                |      |       | M. P. : 125.0 (From ECOT) |     |            |
|                                                                                                         |                                                                |      |       | B. P. :                   |     |            |
|                                                                                                         |                                                                |      |       | 昇 華 性 :                   |     |            |
|                                                                                                         |                                                                |      |       | 吸 湿 性 :                   |     |            |
|                                                                                                         | C                                                              | H    | N     | O                         | S   | X          |
| calcd (%)                                                                                               | 61.09                                                          | 5.54 | 13.74 |                           |     | M·W 509.53 |
| found (%)                                                                                               | 59.56                                                          | 5.50 | 13.20 |                           |     |            |
| 分析後の所見. 分析日付                                                                                            |                                                                |      |       | Note No.                  |     |            |
| 0.35 (ECOT) 90% 59.41, 5.37, 13.32                                                                      |                                                                |      |       | 分析番号: 1921                |     |            |
| 11/24 H. Ohashi                                                                                         |                                                                |      |       |                           |     |            |

杏林製薬(株) 創薬研究所

Compound (-)-24

元素分析報告書

|                                                                                                          |                            |      |       |    |            |     |        |
|----------------------------------------------------------------------------------------------------------|----------------------------|------|-------|----|------------|-----|--------|
| 氏 名                                                                                                      | 竹内 智子 殿                    |      | 申 日   | 09 | 年 12 月 7 日 | 込 付 |        |
| 物 質 名                                                                                                    | 144-3-026                  |      |       |    |            |     |        |
| 分 子 式                                                                                                    | $C_{26}H_{28}FN_5O_6, HCl$ |      |       |    | KCL No.    |     |        |
| 構造式 (又ハ, 分子式・含有元素名)<br>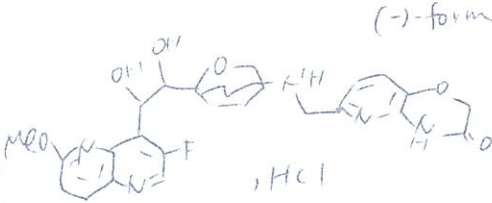 |                            |      |       |    | M. P. :    |     |        |
|                                                                                                          |                            |      |       |    | B. P. :    |     |        |
|                                                                                                          |                            |      |       |    | 昇 華 性 :    |     |        |
|                                                                                                          |                            |      |       |    | 吸 湿 性 :    |     |        |
|                                                                                                          | C                          | H    | N     | O  | S          | X   | M·W    |
| calcd (%)                                                                                                | 55.57                      | 5.20 | 12.46 |    |            |     | 561.99 |
| found (%)                                                                                                | 54.80                      | 5.33 | 12.11 |    |            |     |        |
| 分析後の所見, 分析日付                                                                                             |                            |      |       |    | Note No.   |     |        |
| 12/7<br>55.11 5.06 12.36<br>H. Okash.                                                                    |                            |      |       |    | 分析番号: 1529 |     |        |

杏林製薬(株) 創薬研究所

Compound (+)-24

元素分析報告書

|                                                                                                         |                                                                      |      |         |                                     |        |   |        |
|---------------------------------------------------------------------------------------------------------|----------------------------------------------------------------------|------|---------|-------------------------------------|--------|---|--------|
| 氏 名                                                                                                     | 伊藤智子 殿                                                               |      | 申 日     | 09                                  | 年/2月7日 |   |        |
| 物質名                                                                                                     | 144-3-025                                                            |      |         |                                     |        |   |        |
| 分子式                                                                                                     | C <sub>26</sub> H <sub>28</sub> FN <sub>5</sub> O <sub>6</sub> · HCl |      | KCL No. |                                     |        |   |        |
| 構造式 (又ハ、分子式・含有元素名)<br>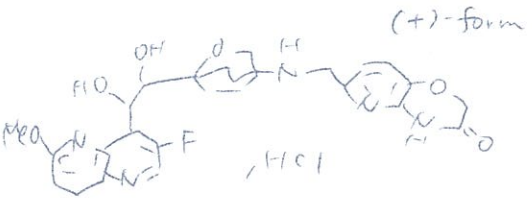 |                                                                      |      | M. P. : |                                     |        |   |        |
|                                                                                                         |                                                                      |      | B. P. : |                                     |        |   |        |
|                                                                                                         |                                                                      |      | 昇 華 性 : |                                     |        |   |        |
|                                                                                                         |                                                                      |      | 吸 湿 性 : |                                     |        |   |        |
|                                                                                                         | C                                                                    | H    | N       | O                                   | S      | X | M·W    |
| calcd (%)                                                                                               | 55.57                                                                | 5.20 | 12.46   |                                     |        |   | 561.99 |
| found (%)                                                                                               | 54.57                                                                | 5.44 | 11.85   |                                     |        |   |        |
| 分析後の所見. 分析日付<br>0.3510H 54.23 5.08 12.16<br>12/7                                                        |                                                                      |      |         | Note No.<br>分析番号: 1528<br>H. Chashu |        |   |        |

杏林製薬(株) 創薬研究所

Compound (-)-25

元素分析報告書

|                                                                                                         |                                                                      |      |       |                |                 |   |        |
|---------------------------------------------------------------------------------------------------------|----------------------------------------------------------------------|------|-------|----------------|-----------------|---|--------|
| 氏 名                                                                                                     | 1771内 智子 殿                                                           |      | 申 日   | 09 年 12 月 18 日 |                 |   |        |
| 物 質 名                                                                                                   | 144-3-036                                                            |      |       |                |                 |   |        |
| 分 子 式                                                                                                   | C <sub>27</sub> H <sub>26</sub> FN <sub>5</sub> O <sub>7</sub> · HCl |      |       |                | KCL No.         |   |        |
| 構造式 (又ハ、分子式・含有元素名)<br>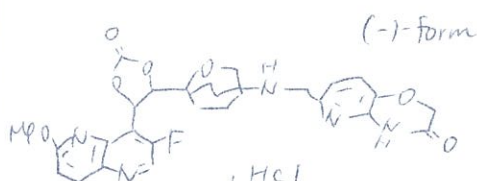 |                                                                      |      |       |                | M. P. : 211.0°C |   |        |
|                                                                                                         |                                                                      |      |       |                | B. P. :         |   |        |
|                                                                                                         |                                                                      |      |       |                | 昇 華 性 :         |   |        |
|                                                                                                         |                                                                      |      |       |                | 吸 湿 性 :         |   |        |
|                                                                                                         | C                                                                    | H    | N     | O              | S               | X | M·W    |
| calcd (%)                                                                                               | 55.15                                                                | 4.63 | 11.91 |                |                 |   | 587.98 |
| found (%)                                                                                               | 54.89                                                                | 4.35 | 11.76 |                |                 |   |        |
| 分析後の所見. 分析日付                                                                                            |                                                                      |      |       |                | Note No.        |   |        |
|                                                                                                         |                                                                      |      |       |                | 分析番号 : 1605     |   |        |
| 12/18                                                                                                   |                                                                      |      |       |                | H Ohashi        |   |        |

杏林製薬(株) 創薬研究所



Compound (+)-25

元素分析報告書

|                                                                                                                     |                                                       |      |       |                |            |   |        |
|---------------------------------------------------------------------------------------------------------------------|-------------------------------------------------------|------|-------|----------------|------------|---|--------|
| 氏 名                                                                                                                 | H7内 智子 殿                                              |      | 申 込 日 | 09 年 12 月 28 日 |            |   |        |
| 物 質 名                                                                                                               | 144-3-040                                             |      |       |                |            |   |        |
| 分 子 式                                                                                                               | (27H <sub>26</sub> FN <sub>5</sub> O <sub>7</sub> HCl |      |       |                | KCL No.    |   |        |
| 構造式 (又ハ、分子式・含有元素名)<br>(+)-form<br>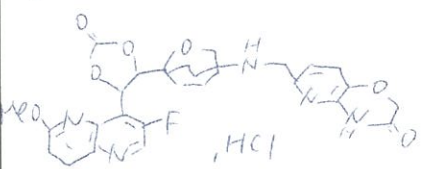 |                                                       |      |       |                | M. P. :    |   |        |
|                                                                                                                     |                                                       |      |       |                | B. P. :    |   |        |
|                                                                                                                     |                                                       |      |       |                | 昇 華 性 :    |   |        |
|                                                                                                                     |                                                       |      |       |                | 吸 湿 性 :    |   |        |
|                                                                                                                     | C                                                     | H    | N     | O              | S          | X | M·W    |
| calcd (%)                                                                                                           | 55.15                                                 | 4.63 | 11.91 |                |            |   | 587.98 |
| found (%)                                                                                                           | 55.01                                                 | 4.64 | 11.83 |                |            |   |        |
| 分析後の所見、分析日付<br>12/28                                                                                                |                                                       |      |       |                | Note No.   |   |        |
|                                                                                                                     |                                                       |      |       |                | 分析番号: 1636 |   |        |

杏林製薬(株) 創薬研究所

(±)-7 LC Chart

Mobile phase: A: 0.04% TFA in water. B: 0.02% TFA in acetonitrile.

Gradient: 0% B to 100% B in 3.4 minutes and holding at 100% B for 0.6 minutes, then drop back to 0% B in 0.01 min and keep for 0.49 minutes.

Column: Agilent TC-C18, 2.1\*50mm, 5µm.

Flow rate: 0.6 ml/min

Temperature: 40 °C

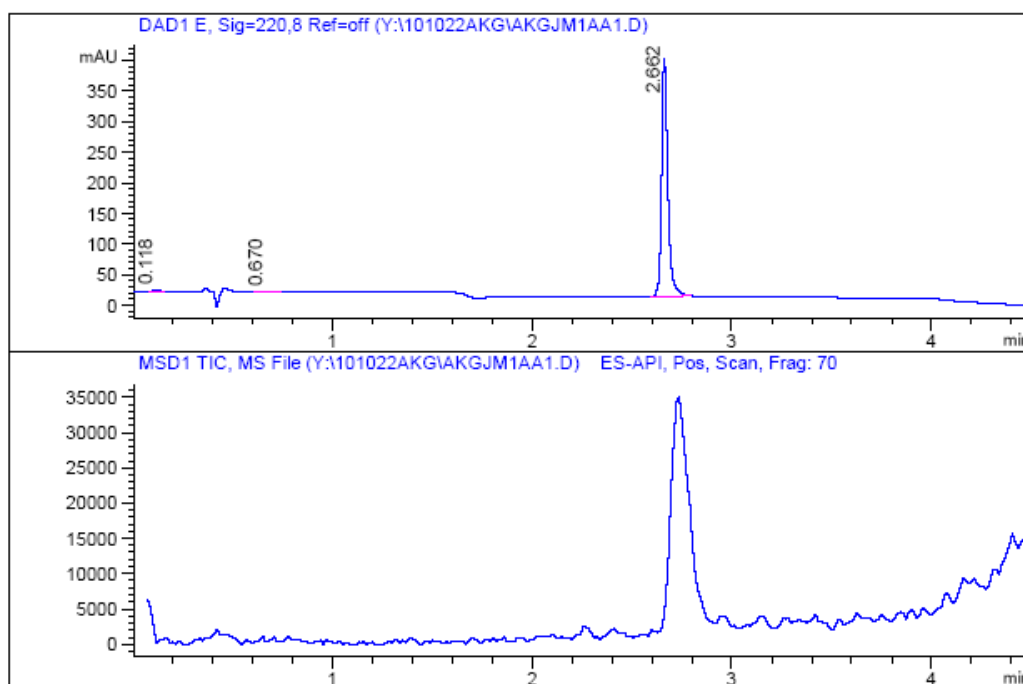

Report

Signal 1 : DAD1 E, Sig=220,8 Ref=off

| Peak # | RT [min] | Area    | Height  | Height % | Width [min] | Area % |
|--------|----------|---------|---------|----------|-------------|--------|
| 1      | 0.118    | 7.335   | 2.782   | 0.707    | 0.044       | 0.843  |
| 2      | 0.670    | 5.269   | 1.066   | 0.271    | 0.082       | 0.605  |
| 3      | 2.662    | 857.609 | 389.742 | 99.022   | 0.033       | 98.552 |

(±)-**8** LC Chart

Mobile phase: A: 0.04% TFA in water. B: 0.02% TFA in acetonitrile.

Gradient: 1% B to 100% B in 3.4 minutes and holding at 100% B for 0.6 minutes, then drop back to 1% B in 0.01 min and keep for 0.49 minutes.

Column: Agilent TC-C18, 2.1\*50 mm, 5 µm.

Flow rate: 0.8 ml/min

Temperature: 50 °C

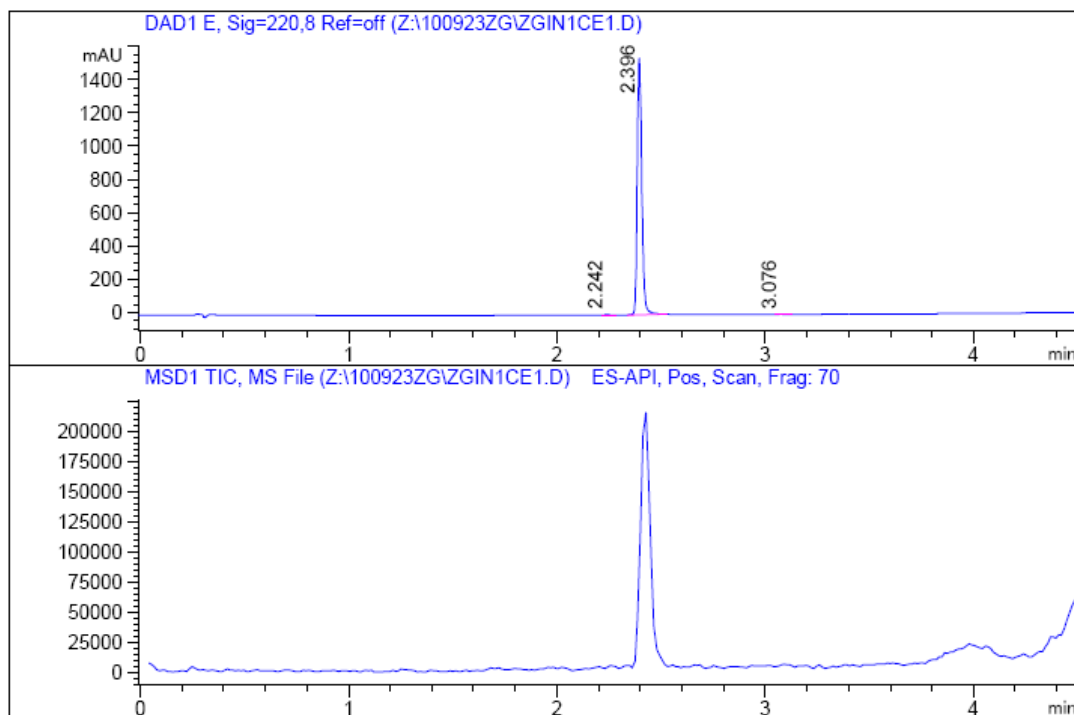

Report

| Signal 1 : DAD1 E, Sig=220,8 Ref=off |          |          |          |          |             |        |
|--------------------------------------|----------|----------|----------|----------|-------------|--------|
| Peak #                               | RT [min] | Area     | Height   | Height % | Width [min] | Area % |
| 1                                    | 2.242    | 3.070    | 2.524    | 0.163    | 0.019       | 0.130  |
| 2                                    | 2.396    | 2359.612 | 1545.041 | 99.732   | 0.024       | 99.745 |
| 3                                    | 3.076    | 2.951    | 1.629    | 0.105    | 0.028       | 0.125  |

(±)-9 LC Chart

Mobile phase: A: 0.04% TFA in water. B: 0.02% TFA in acetonitrile.

Gradient: 1% B to 100% B in 3.4 minutes and holding at 100% B for 0.6 minutes, then drop back to 1% B in 0.01 min and keep for 0.49 minutes.

Column: Agilent TC-C18, 2.1\*50 mm, 5 µm.

Flow rate: 0.8 ml/min

Temperature: 50 °C

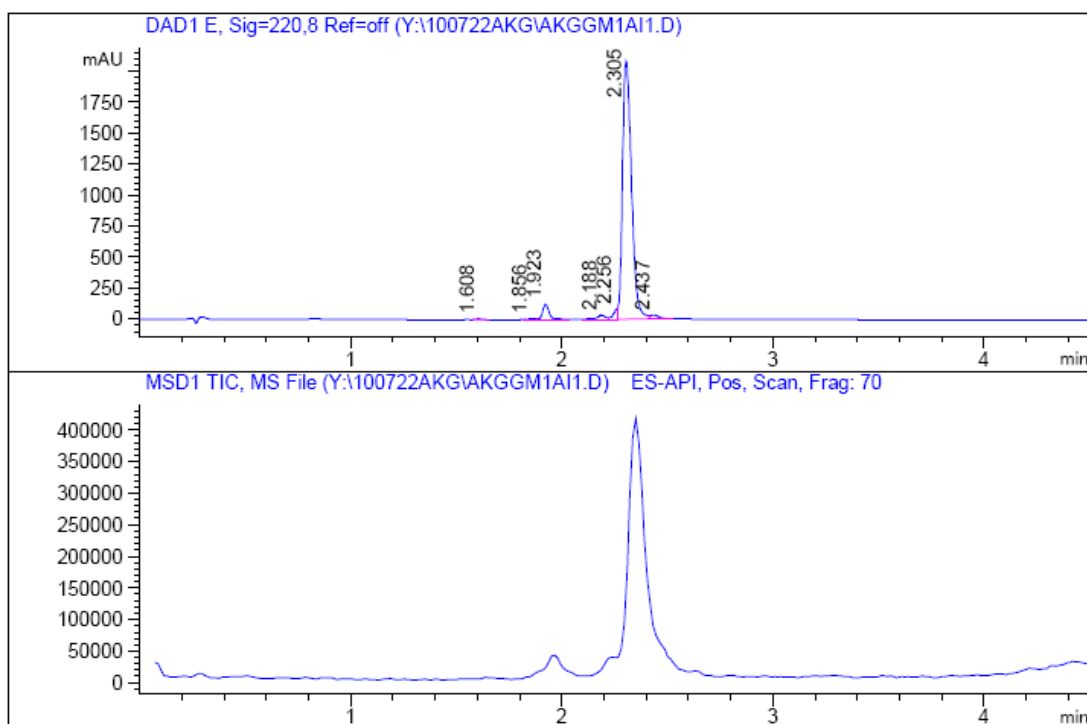

Report

| Signal 1 : DAD1 E, Sig=220,8 Ref=off |          |          |          |          |             |        |
|--------------------------------------|----------|----------|----------|----------|-------------|--------|
| Peak #                               | RT [min] | Area     | Height   | Height % | Width [min] | Area % |
| 1                                    | 1.608    | 10.600   | 5.903    | 0.251    | 0.028       | 0.157  |
| 2                                    | 1.856    | 13.402   | 5.788    | 0.247    | 0.033       | 0.199  |
| 3                                    | 1.923    | 259.164  | 122.277  | 5.209    | 0.033       | 3.846  |
| 4                                    | 2.188    | 83.333   | 30.881   | 1.316    | 0.040       | 1.237  |
| 5                                    | 2.256    | 103.418  | 71.108   | 3.029    | 0.021       | 1.535  |
| 6                                    | 2.305    | 6180.133 | 2080.675 | 88.637   | 0.047       | 91.704 |
| 7                                    | 2.437    | 89.180   | 30.776   | 1.311    | 0.043       | 1.323  |

(±)-**11** LC Chart

Mobile phase: A: 0.04% TFA in water. B: 0.02% TFA in acetonitrile.

Gradient: 0% B to 100% B in 3.4 minutes and holding at 100% B for 0.6 minutes, then drop back to 0% B in 0.01min and keep for 0.49 minutes.

Column: Agilent TC-C18, 2.1\*50 mm, 5 µm.

Flow rate: 0.6 ml/min

Temperature: 40 °C

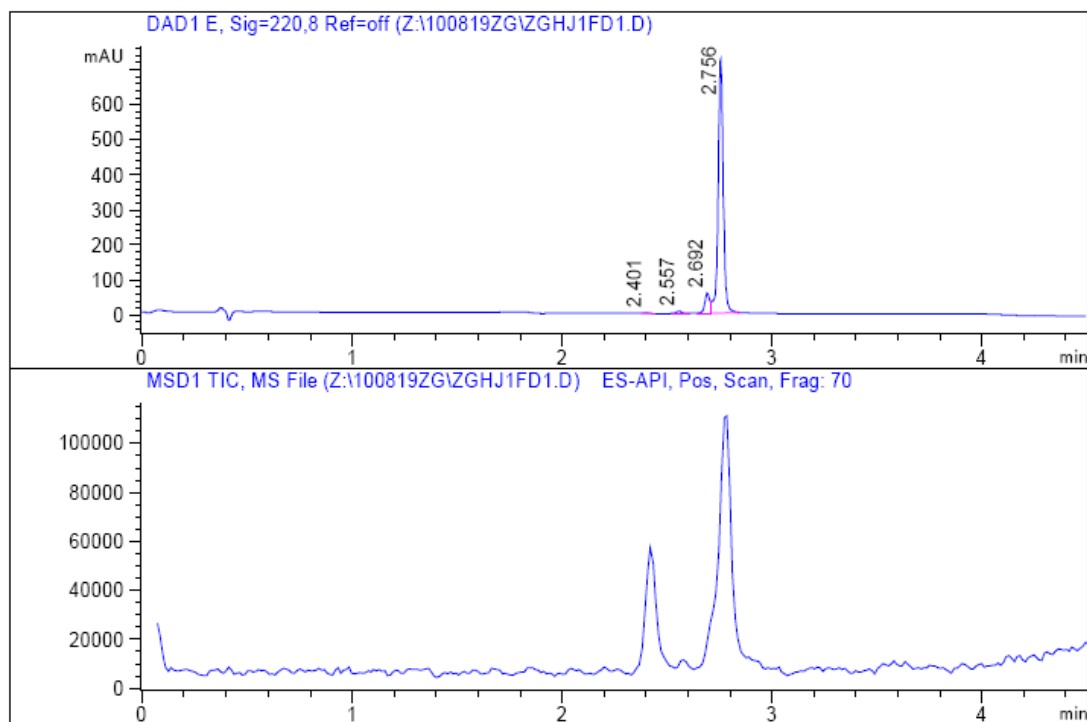

Report

| Signal 1 : DAD1 E, Sig=220,8 Ref=off |          |          |         |          |             |        |
|--------------------------------------|----------|----------|---------|----------|-------------|--------|
| Peak #                               | RT [min] | Area     | Height  | Height % | Width [min] | Area % |
| 1                                    | 2.401    | 2.694    | 1.909   | 0.242    | 0.022       | 0.202  |
| 2                                    | 2.557    | 11.141   | 6.229   | 0.789    | 0.028       | 0.835  |
| 3                                    | 2.692    | 93.302   | 56.485  | 7.158    | 0.024       | 6.989  |
| 4                                    | 2.756    | 1227.837 | 724.536 | 91.811   | 0.026       | 91.975 |

(±)-12 LC Chart

Mobile phase: A: 0.04% TFA in water. B: 0.02% TFA in acetonitrile.

Gradient: 0% B to 100% B in 3.4 minutes and holding at 100% B for 0.6 minutes, then drop back to 0% B in 0.01min and keep for 0.49 minutes.

Column: Agilent TC-C18, 2.1\*50 mm, 5 µm.

Flow rate: 0.6 ml/min

Temperature: 40 °C

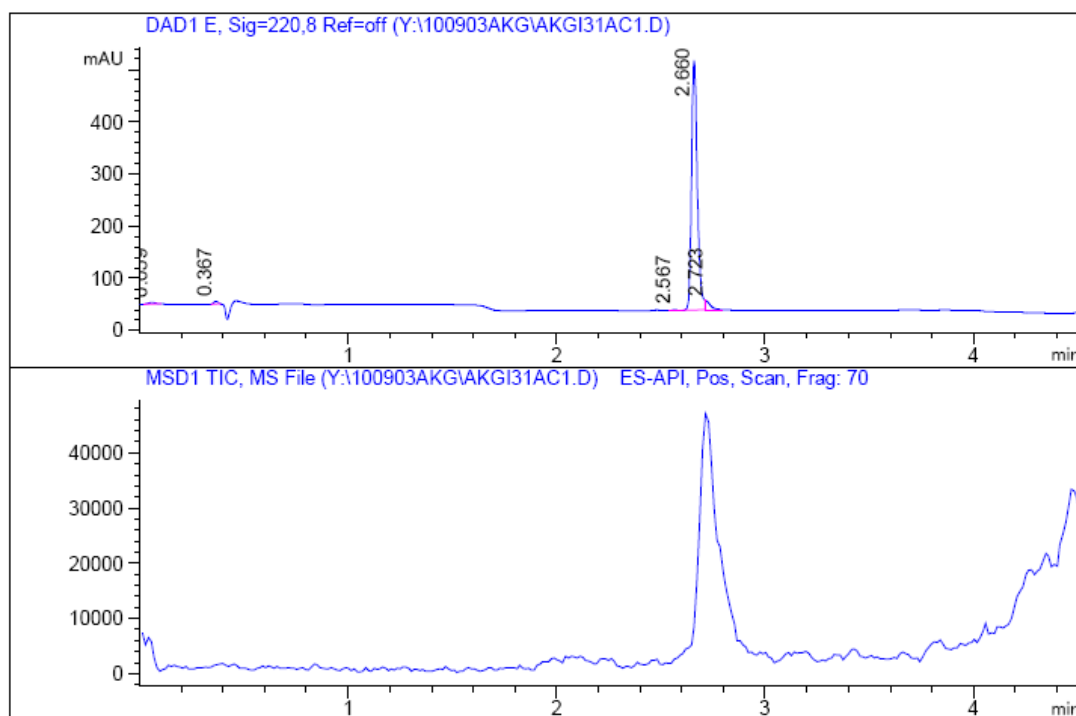

Report

| Signal 1 : DAD1 E, Sig=220,8 Ref=off |          |         |         |          |             |        |
|--------------------------------------|----------|---------|---------|----------|-------------|--------|
| Peak #                               | RT [min] | Area    | Height  | Height % | Width [min] | Area % |
| 1                                    | 0.059    | 6.466   | 2.621   | 0.519    | 0.041       | 0.664  |
| 2                                    | 0.367    | 7.511   | 5.693   | 1.127    | 0.022       | 0.772  |
| 3                                    | 2.567    | 2.012   | 1.250   | 0.248    | 0.026       | 0.207  |
| 4                                    | 2.660    | 925.911 | 478.863 | 94.816   | 0.030       | 95.137 |
| 5                                    | 2.723    | 31.339  | 16.615  | 3.290    | 0.028       | 3.220  |

(±)-16 LC Chart

Mobile phase: A: 0.04% TFA in water. B: 0.02% TFA in acetonitrile.

Gradient: 0% B to 100% B in 3.4 minutes and holding at 100% B for 0.6 minutes, then drop back to 0% B in 0.01 min and keep for 0.49 minutes.

Column: Agilent TC-C18, 2.1\*50 mm, 5 µm.

Flow rate: 0.6 ml/min

Temperature: 40 °C

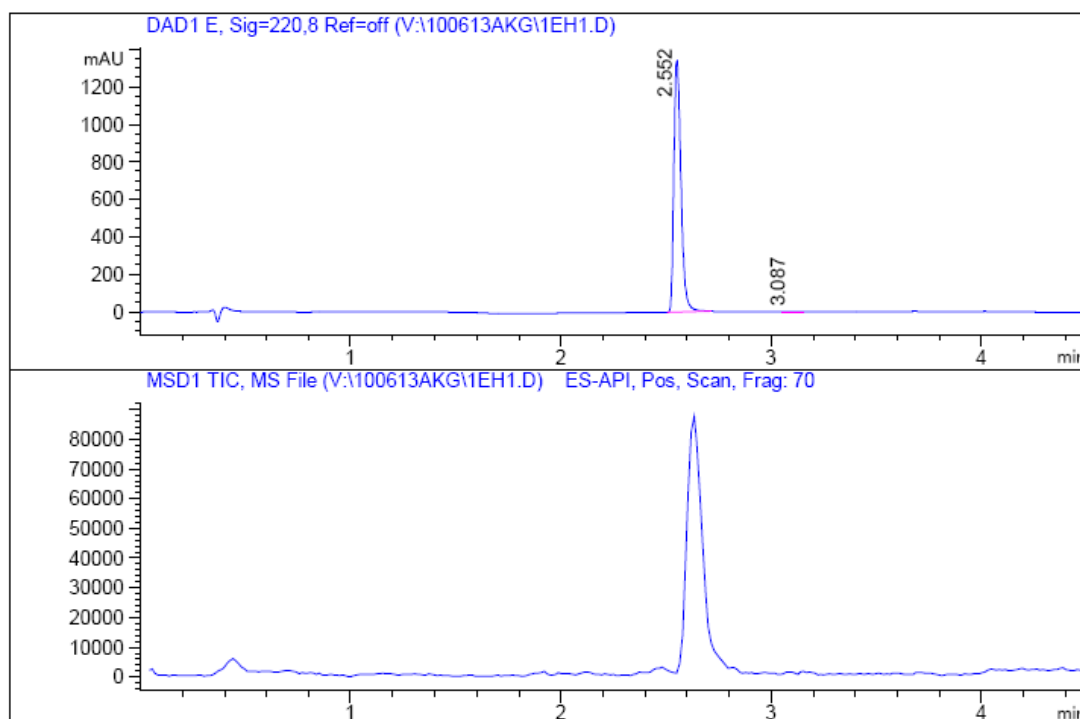

Report

Signal 1 : DAD1 E, Sig=220,8 Ref=off

| Peak # | RT [min] | Area     | Height   | Height % | Width [min] | Area % |
|--------|----------|----------|----------|----------|-------------|--------|
| 1      | 2.552    | 3158.110 | 1342.000 | 99.855   | 0.036       | 99.839 |
| 2      | 3.087    | 5.102    | 1.954    | 0.145    | 0.040       | 0.161  |

(±)-17 LC Chart

Mobile phase: A: 0.04% TFA in water. B: 0.02% TFA in acetonitrile.

Gradient: 1% B to 100% B in 3.4 minutes and holding at 100% B for 0.6 minutes, then drop back to 1% B in 0.01 min and keep for 0.49 minutes.

Column: Agilent TC-C18, 2.1\*50 mm, 5 µm.

Flow rate: 0.8 ml/min

Temperature: 50 °C

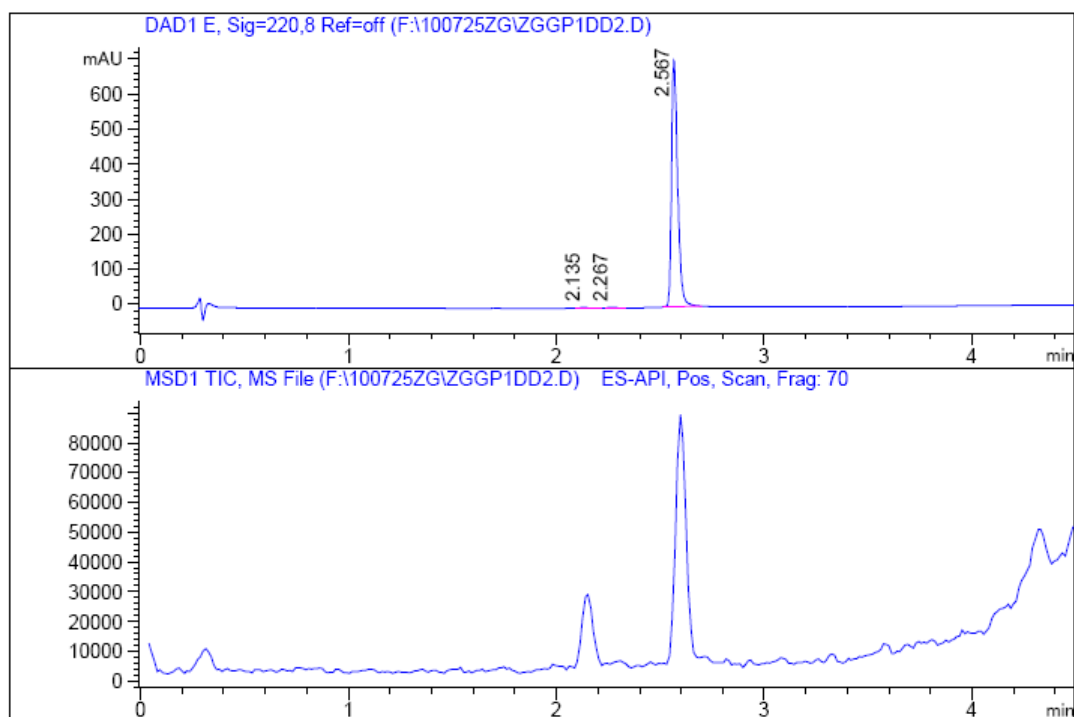

Report

| Signal 1 : DAD1 E, Sig=220,8 Ref=off |          |          |         |          |             |        |
|--------------------------------------|----------|----------|---------|----------|-------------|--------|
| Peak #                               | RT [min] | Area     | Height  | Height % | Width [min] | Area % |
| 1                                    | 2.135    | 2.853    | 1.547   | 0.219    | 0.034       | 0.196  |
| 2                                    | 2.267    | 3.013    | 1.458   | 0.206    | 0.033       | 0.207  |
| 3                                    | 2.567    | 1452.940 | 704.014 | 99.575   | 0.031       | 99.598 |



## 18 LC Chart

Mobile phase: A: 0.04% TFA in water. B: 0.02% TFA in acetonitrile.

Gradient: 1% B to 100% B in 3.4 minutes and holding at 100% B for 0.6 minutes, then drop back to 1% B in 0.01 min and keep for 0.49 minutes.

Column: Agilent TC-C18, 2.1\*50 mm, 5 µm.

Flow rate: 0.8 ml/min

Temperature: 50 °C

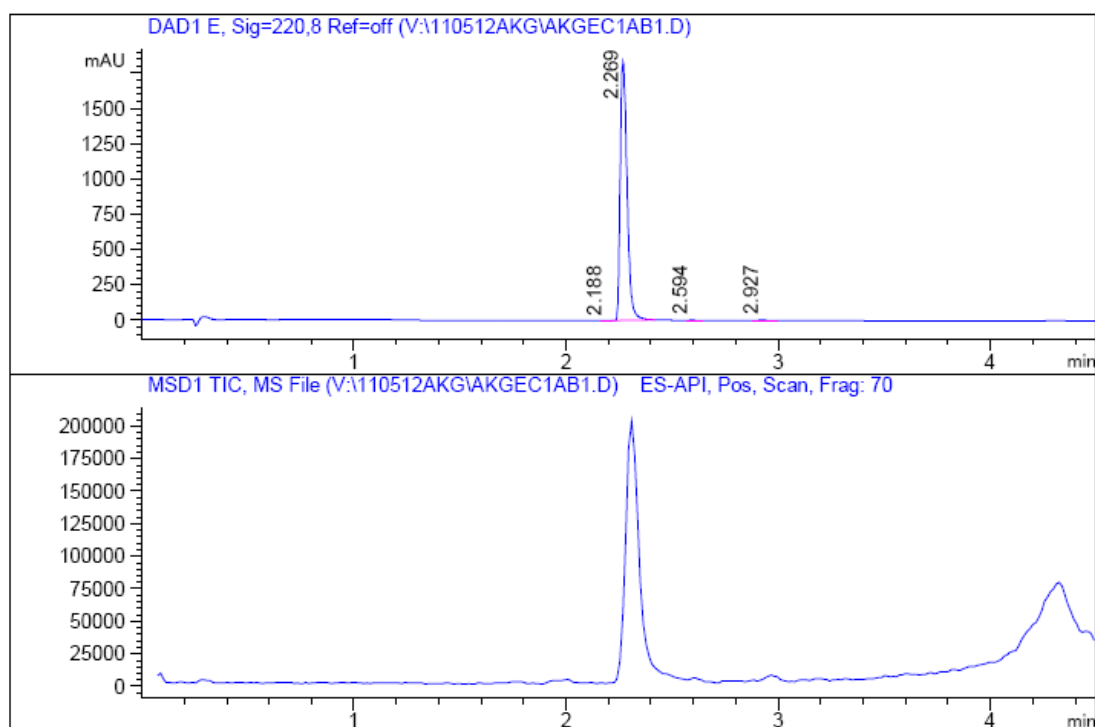

### Report

| Signal 1 : DAD1 E, Sig=220,8 Ref=off |          |          |          |          |             |        |
|--------------------------------------|----------|----------|----------|----------|-------------|--------|
| Peak #                               | RT [min] | Area     | Height   | Height % | Width [min] | Area % |
| 1                                    | 2.188    | 2.133    | 1.368    | 0.075    | 0.025       | 0.051  |
| 2                                    | 2.269    | 4131.760 | 1827.202 | 99.552   | 0.036       | 99.556 |
| 3                                    | 2.594    | 3.250    | 1.807    | 0.098    | 0.028       | 0.078  |
| 4                                    | 2.927    | 13.065   | 5.041    | 0.275    | 0.039       | 0.315  |

(±)-**20** LC Chart

Mobile phase: A: 0.04% TFA in water. B: 0.02% TFA in acetonitrile.

Gradient: 1% B to 100% B in 3.4 minutes and holding at 100% B for 0.6 minutes, then drop back to 1% B in 0.01 min and keep for 0.49 minutes.

Column: Agilent TC-C18, 2.1\*50 mm, 5 µm.

Flow rate: 0.8 ml/min

Temperature: 50°C

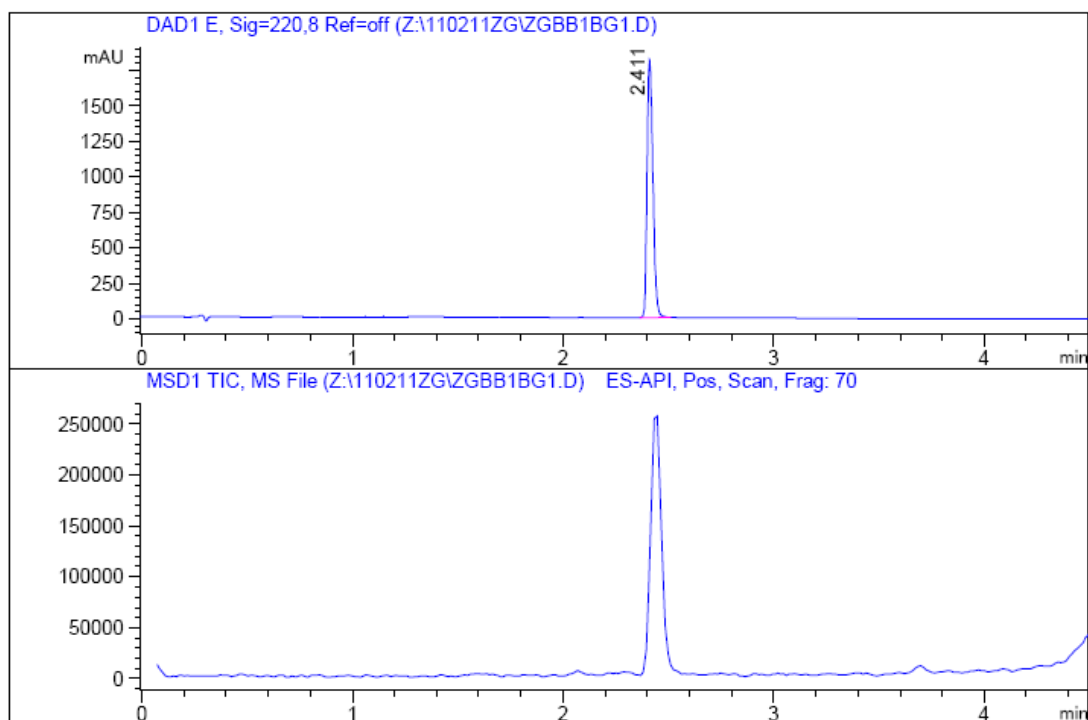

Report

Signal 1 : DAD1 E, Sig=220,8 Ref=off

| Peak # | RT [min] | Area     | Height   | Height % | Width [min] | Area %  |
|--------|----------|----------|----------|----------|-------------|---------|
| 1      | 2.411    | 3523.996 | 1821.404 | 100.000  | 0.031       | 100.000 |

(±)-**21** LC Chart

Mobile phase: A: 0.04% TFA in water. B: 0.02% TFA in acetonitrile.

Gradient: 0% B to 100% B in 3.4 minutes and holding at 100% B for 0.6 minutes, then drop back to 0% B in 0.01 min and keep for 0.49 minutes.

Column: Agilent TC-C18, 2.1\*50 mm, 5 µm.

Flow rate: 0.6 ml/min

Temperature: 40 °C

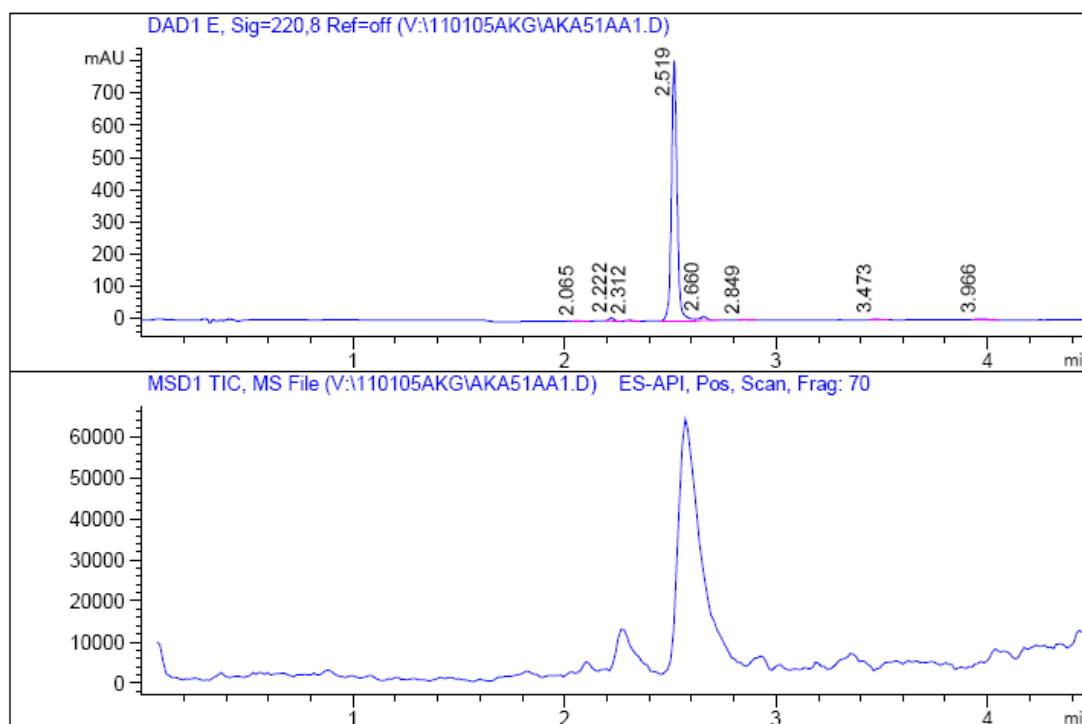

Report

Signal 1 : DAD1 E, Sig=220,8 Ref=off

| Peak # | RT [min] | Area     | Height  | Height % | Width [min] | Area % |
|--------|----------|----------|---------|----------|-------------|--------|
| 1      | 2.065    | 2.466    | 1.655   | 0.197    | 0.024       | 0.159  |
| 2      | 2.222    | 16.119   | 9.514   | 1.132    | 0.026       | 1.040  |
| 3      | 2.312    | 4.887    | 3.143   | 0.374    | 0.024       | 0.315  |
| 4      | 2.519    | 1475.009 | 806.922 | 96.007   | 0.028       | 95.189 |
| 5      | 2.660    | 30.664   | 11.786  | 1.402    | 0.037       | 1.979  |
| 6      | 2.849    | 3.602    | 1.699   | 0.202    | 0.032       | 0.232  |
| 7      | 3.473    | 5.322    | 2.716   | 0.323    | 0.031       | 0.343  |
| 8      | 3.966    | 11.489   | 3.043   | 0.362    | 0.057       | 0.741  |

(±)-**22** LC Chart

Mobile phase: A: 0.04% TFA in water. B: 0.02% TFA in acetonitrile.

Gradient: 1% B to 100% B in 3.4 minutes and holding at 100% B for 0.6 minutes, then drop back to 1% B in 0.01min and keep for 0.49 minutes.

Column: Agilent TC-C18, 2.1\*50 mm, 5 µm.

Flow rate: 0.8 ml/min

Temperature: 50 °C

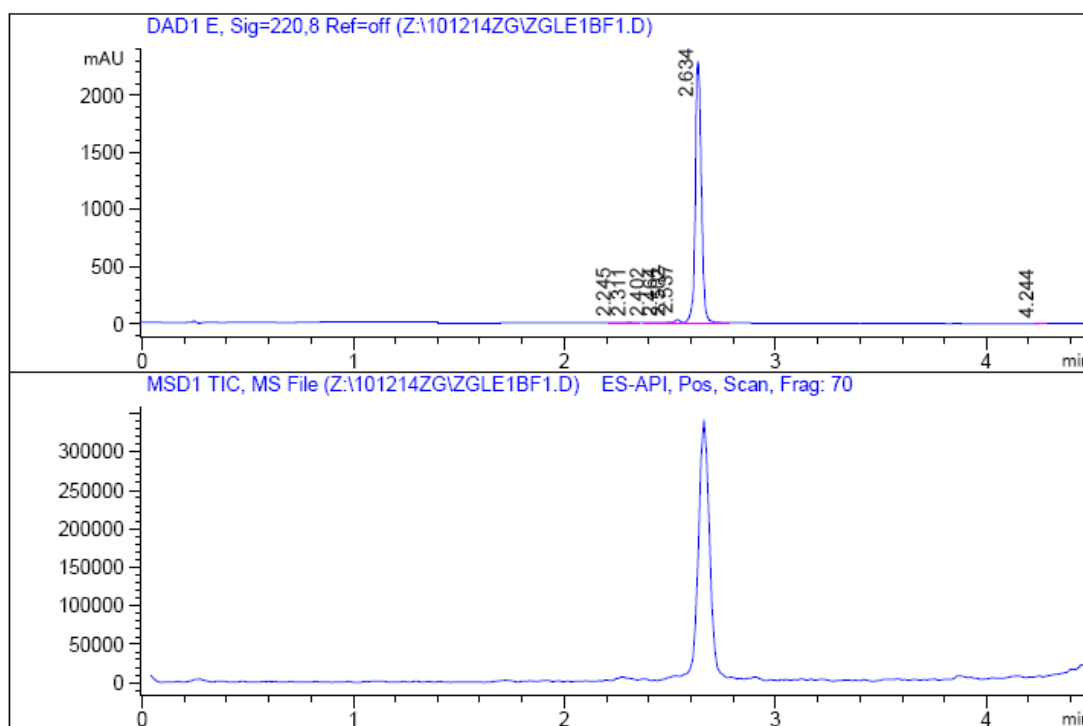

Report

| Signal 1 : DAD1 E, Sig=220,8 Ref=off |          |          |          |          |             |        |
|--------------------------------------|----------|----------|----------|----------|-------------|--------|
| Peak #                               | RT [min] | Area     | Height   | Height % | Width [min] | Area % |
| 1                                    | 2.245    | 4.653    | 2.725    | 0.116    | 0.025       | 0.100  |
| 2                                    | 2.311    | 12.877   | 8.375    | 0.357    | 0.023       | 0.278  |
| 3                                    | 2.402    | 3.341    | 2.226    | 0.095    | 0.023       | 0.072  |
| 4                                    | 2.464    | 5.544    | 4.068    | 0.173    | 0.021       | 0.120  |
| 5                                    | 2.502    | 12.869   | 8.857    | 0.378    | 0.022       | 0.277  |
| 6                                    | 2.537    | 49.215   | 30.122   | 1.284    | 0.025       | 1.061  |
| 7                                    | 2.634    | 4548.890 | 2288.327 | 97.552   | 0.031       | 98.064 |
| 8                                    | 4.244    | 1.314    | 1.054    | 0.045    | 0.020       | 0.028  |

(±)-**23** LC Chart

Mobile phase: A: 0.04% TFA in water. B: 0.02% TFA in acetonitrile.

Gradient: 1% B to 100% B in 3.4 minutes and holding at 100% B for 0.6 minutes, then drop back to 1% B in 0.01min and keep for 0.49 minutes.

Column: Agilent TC-C18, 2.1\*50 mm, 5 µm.

Flow rate: 0.8 ml/min

Temperature: 50 °C

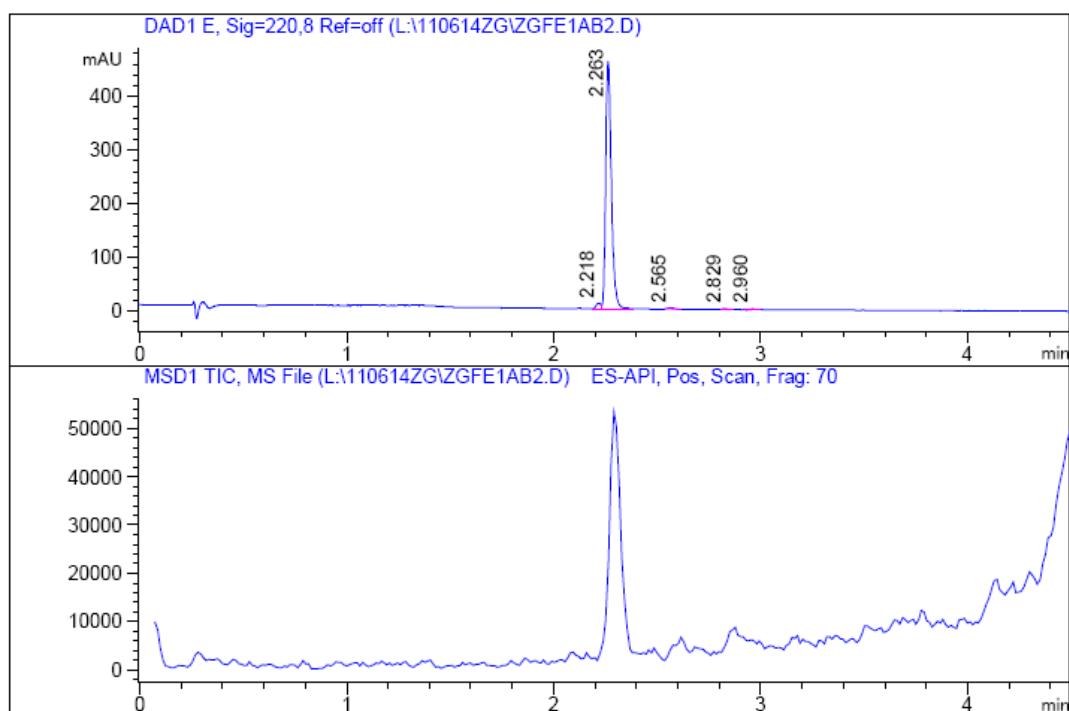

Report

Signal 1 : DAD1 E, Sig=220,8 Ref=off

| Peak # | RT [min] | Area    | Height  | Height % | Width [min] | Area % |
|--------|----------|---------|---------|----------|-------------|--------|
| 1      | 2.218    | 15.724  | 10.513  | 2.200    | 0.025       | 1.758  |
| 2      | 2.263    | 870.000 | 462.619 | 96.811   | 0.031       | 97.291 |
| 3      | 2.565    | 3.864   | 2.222   | 0.465    | 0.028       | 0.432  |
| 4      | 2.829    | 1.903   | 1.255   | 0.263    | 0.025       | 0.213  |
| 5      | 2.960    | 2.738   | 1.249   | 0.261    | 0.037       | 0.306  |

# Compound 5

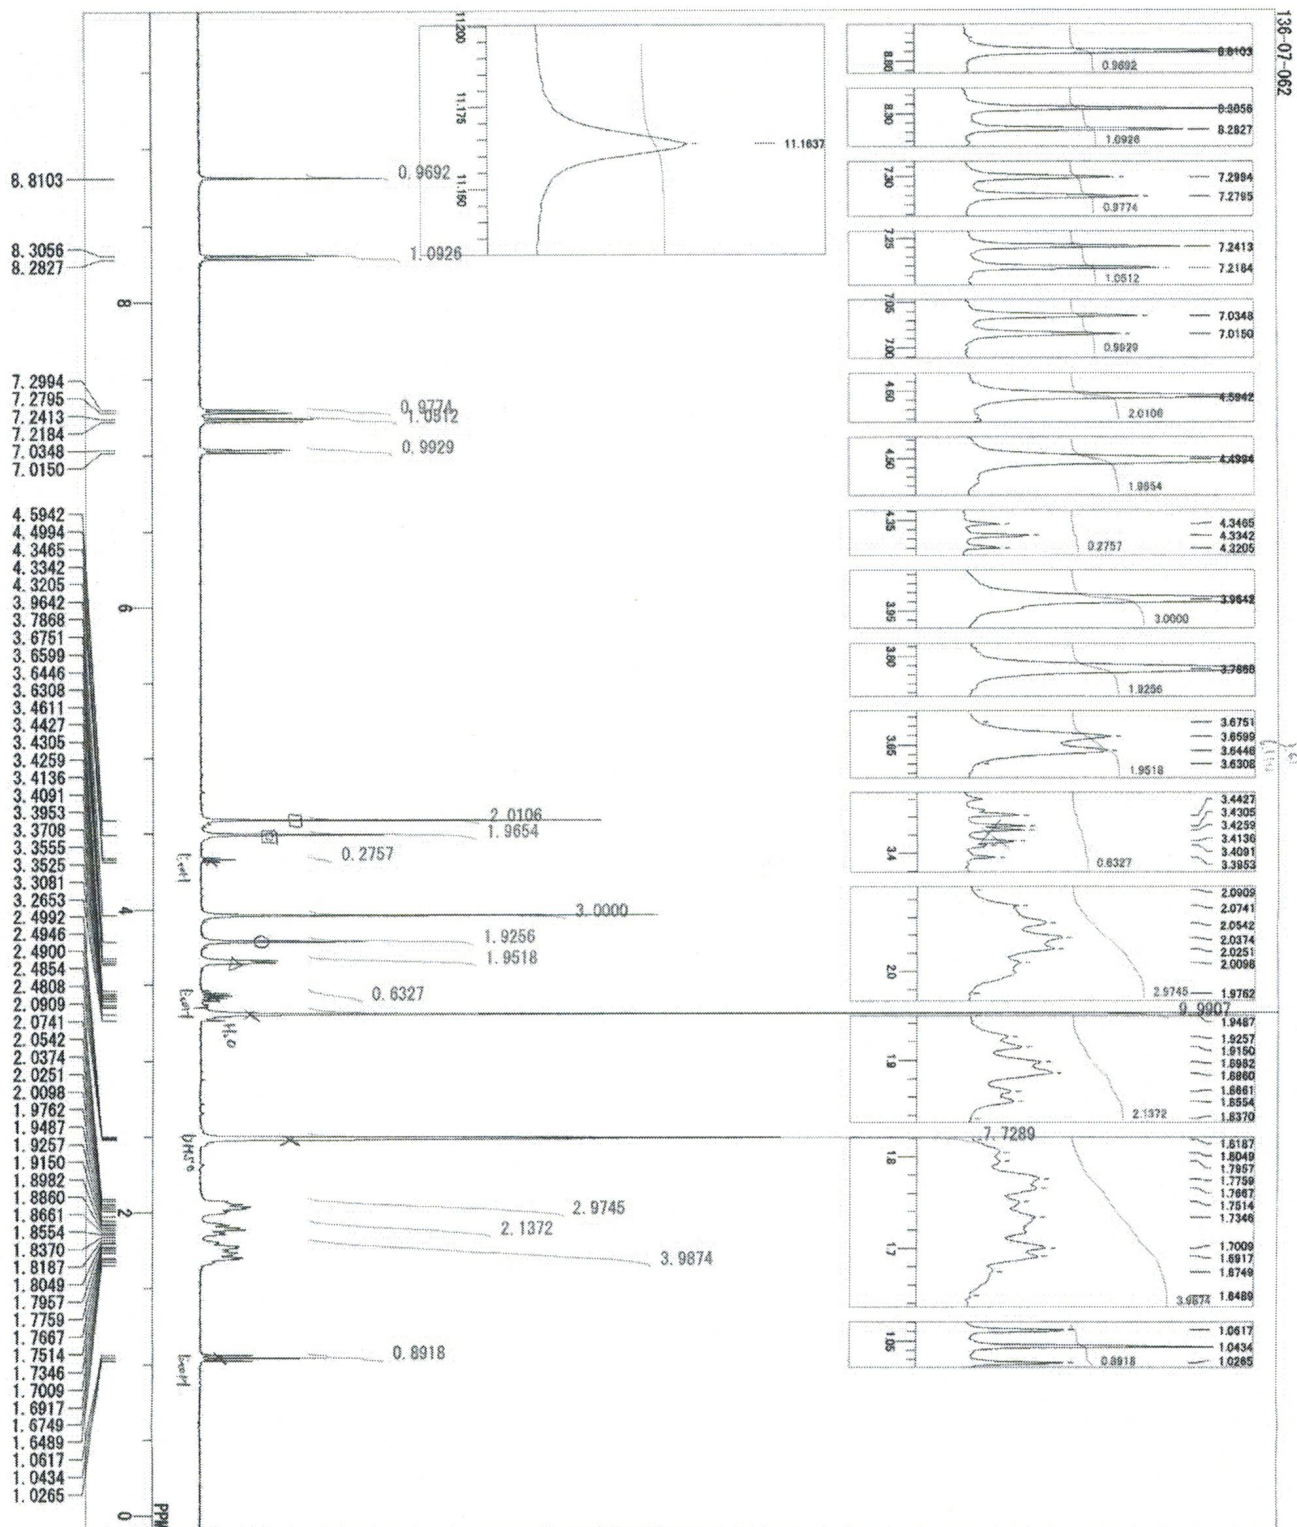

**<sup>1</sup>H-NMR (DMSO-d<sub>6</sub>) δ:**

- 8.81 (1H, s), J = 9.2 Hz.
- 8.29 (1H, d, J = 7.9 Hz).
- 7.29 (1H, d, J = 7.9 Hz).
- 7.23 (1H, d, J = 9.2 Hz).
- 7.02 (1H, d, J = 7.9 Hz).
- 4.59 (2H, s).
- 4.50 (2H, s).
- 4.33 (1H, t, J = 5.2 Hz).
- 3.96 (3H, s).
- 3.79 (2H, s).
- 3.65 (2H, q, J = 5.9 Hz).
- 3.46-3.40 (1H, m).
- 3.31 (10H, s).
- 2.50-2.48 (8H, m).
- 2.09-1.98 (3H, m).
- 1.89 (2H, dd, J = 24.3, 12.1, 7.8 Hz).
- 1.82-1.65 (4H, m).
- 1.04 (1H, t, J = 7.0 Hz).

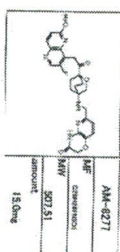

LC-MS: 0.50 (100%)

10.03.09  
1/10  
10

DF-FILE F:\NMR\手帳\136-07-062\data\136-07-062  
COUNT 29-03-2010 09:27:35  
DATE 29-03-2010 09:27:35  
NAME 136-07-062  
EXNO 399.78 MHz  
PULPROG zgpg30  
PROBHD 5 mm QNP 1H/13C  
FREQ 125.76 MHz  
SCANS 32  
AQ 1.6358 sec  
RG 5.0000 sec  
PD 6.13 usec  
P1 23.70 usec  
PC 23.70 usec  
PR 23.70 usec  
SOLVENT DMSO  
NS 2.49 ppm  
DS 0.12 Hz  
AQ 40



# Compound C-6

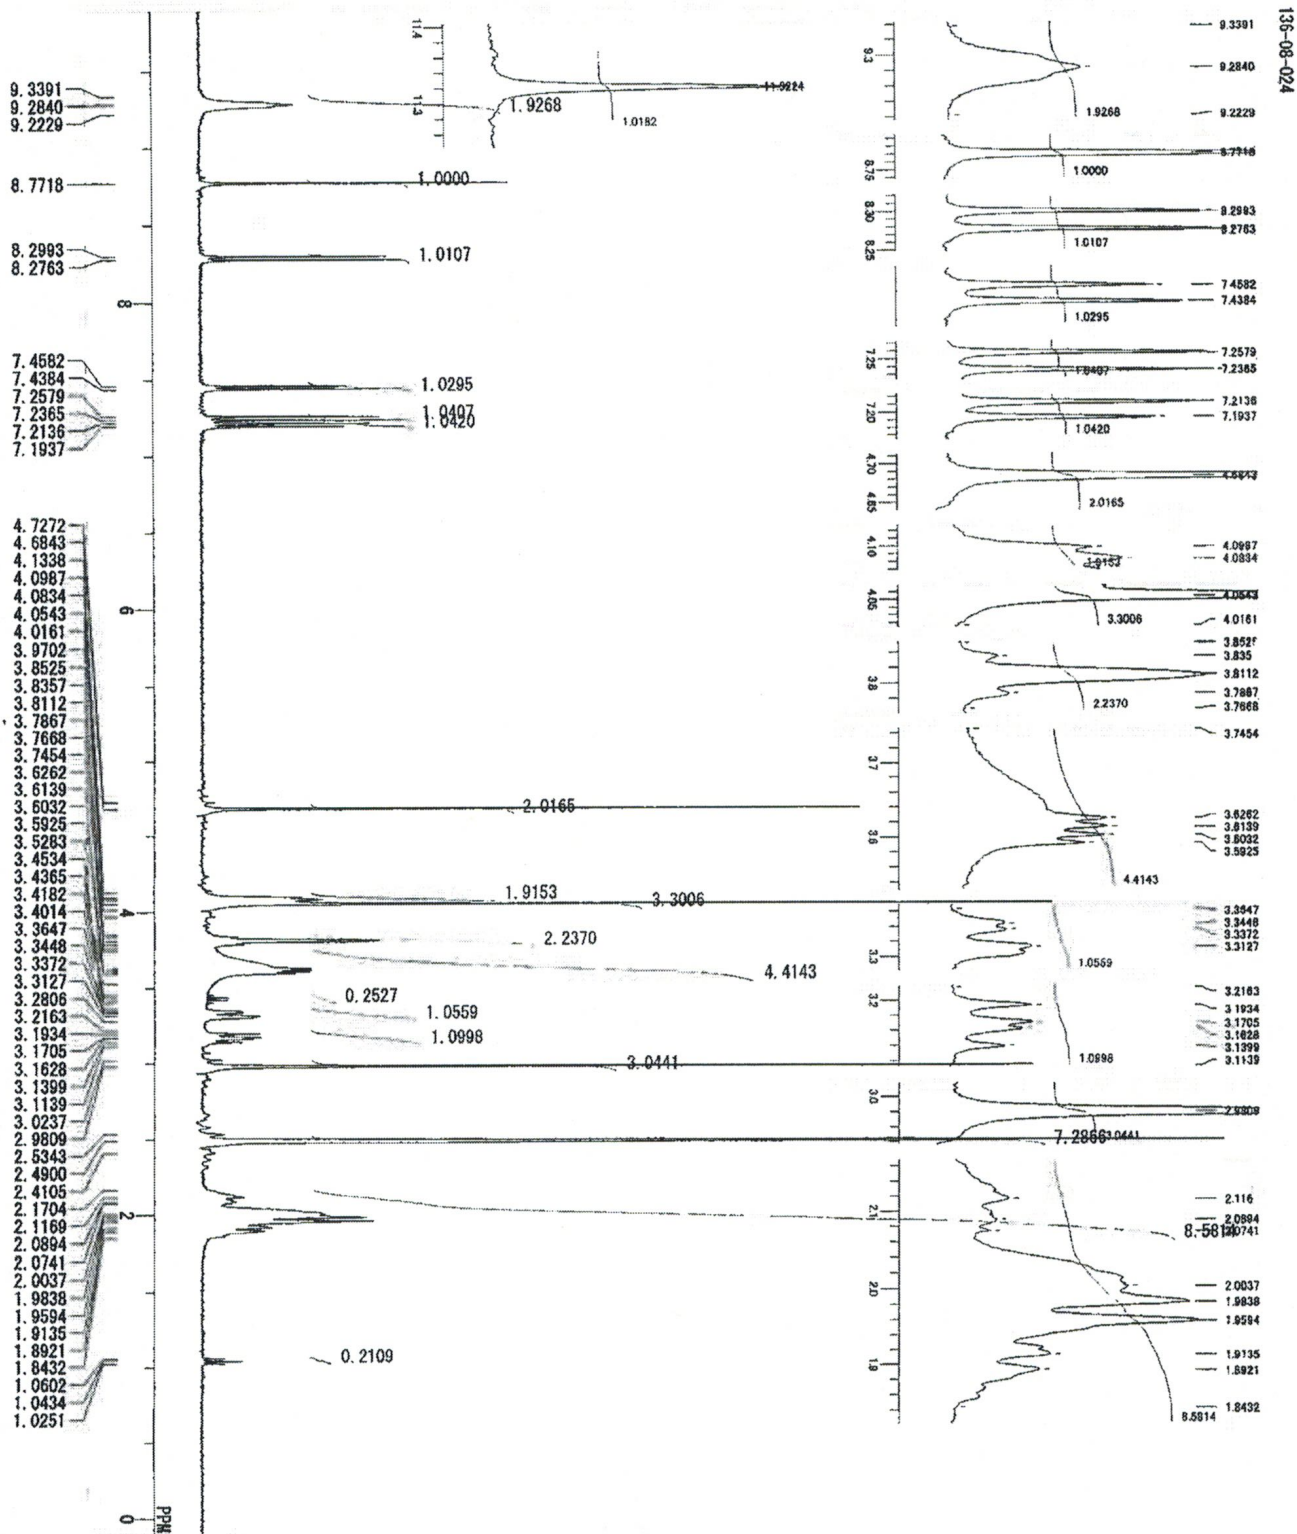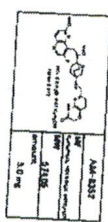

1H-NMR (DMSO-d6)  $\delta$ :  
 9.28 (2H, t, J = 23.2 Hz),  
 8.77 (1H, s),  
 8.29 (1H, d, J = 9.2 Hz),  
 7.45 (1H, d, J = 7.9 Hz),  
 7.25 (1H, d, J = 8.6 Hz),  
 7.20 (1H, d, J = 7.9 Hz),  
 4.68 (2H, s),  
 4.09 (2H, d, J = 6.1 Hz),  
 4.04 (3H, d, J = 15.3 Hz),  
 3.85-3.77 (2H, m),  
 3.75-3.59 (4H, m),  
 3.43 (1H, d, J = 6.9 Hz),  
 3.34 (1H, dd, J = 11.9, 8.9 Hz),  
 3.17 (1H, dt, J = 21.8, 9.5 Hz),  
 2.98 (3H, s),  
 2.49 (7H, s),  
 1.98 (9H, t, J = 39.4, 10.5 Hz),  
 1.04 (1H, t, J = 7.0 Hz).

EXPERIMENTAL CONDITIONS:  
 DATE: 13-08-024  
 TIME: 15:52:50  
 INSTRUMENT: Bruker Avance 400  
 PULPROG: zgpg30  
 F2: 400.146 MHz  
 F1: 101.255 MHz  
 AQC1: 1.6358 sec  
 PD: 5.0000 sec  
 PC: 3.00 usec  
 TRAC: 1H  
 CTAB: 22.2 c  
 SLVNT: DMSO  
 EXREF: 2.49 ppm  
 RF: 0.12 Hz  
 RGAIN: 64

10.06.08  
 1/4 1/1  
 1/1

# Compound (±)-7

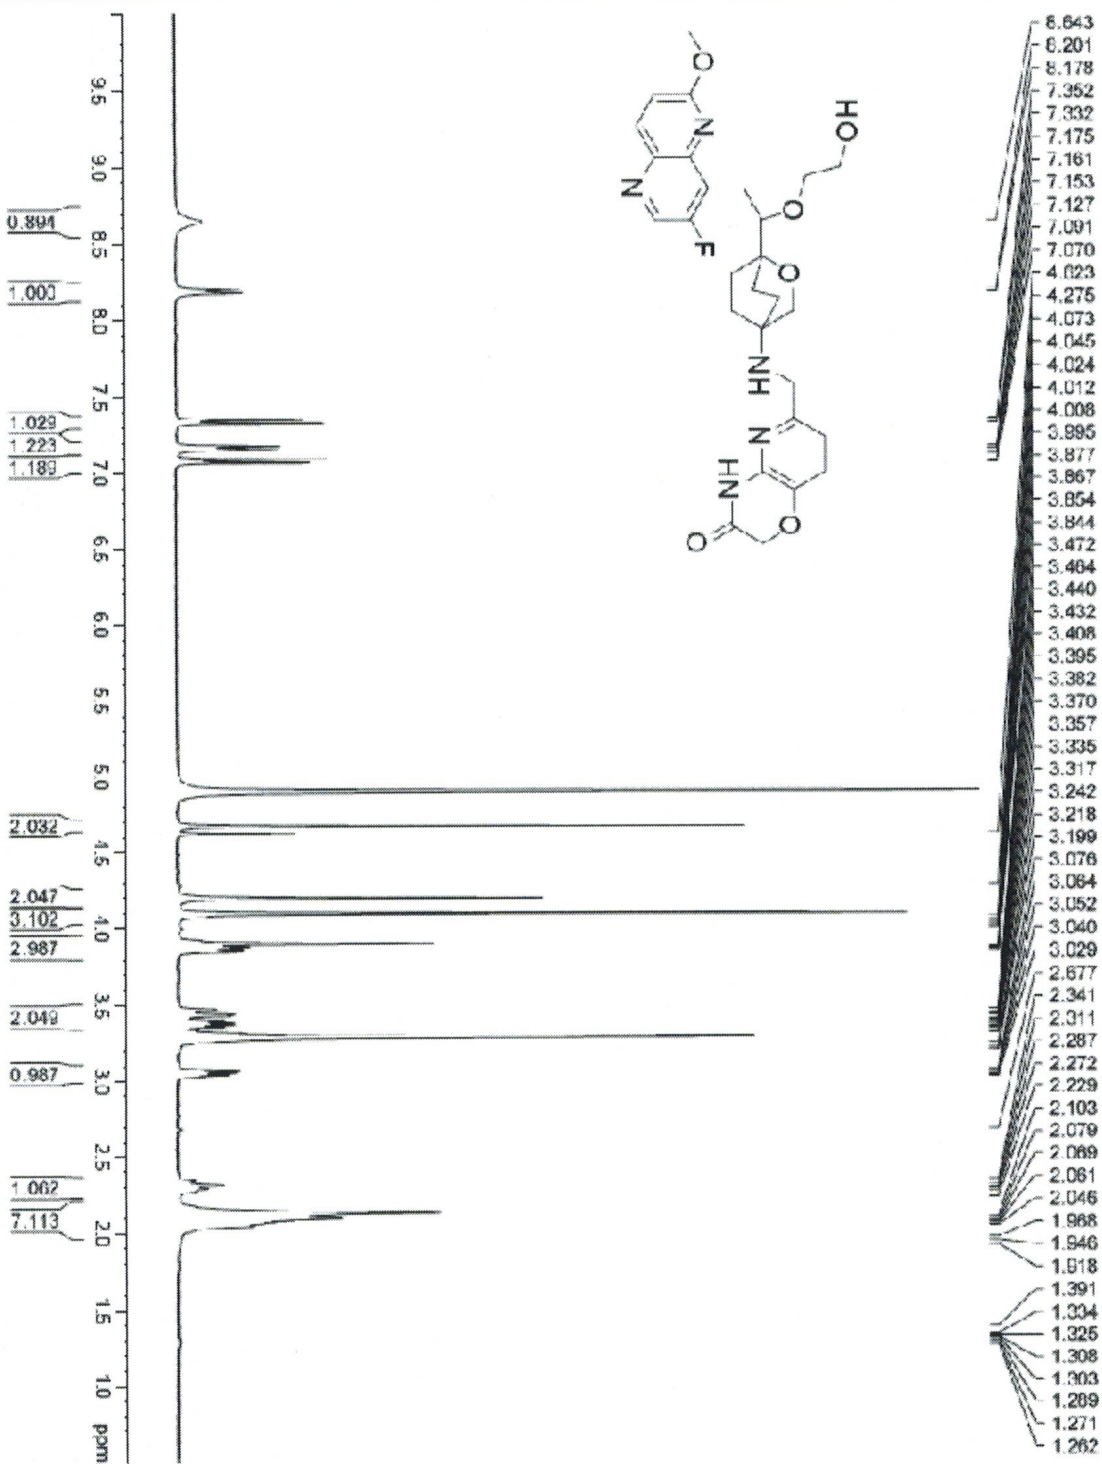

(±)-7 <sup>1</sup>H-NMR Chart



# Compound (±)-8

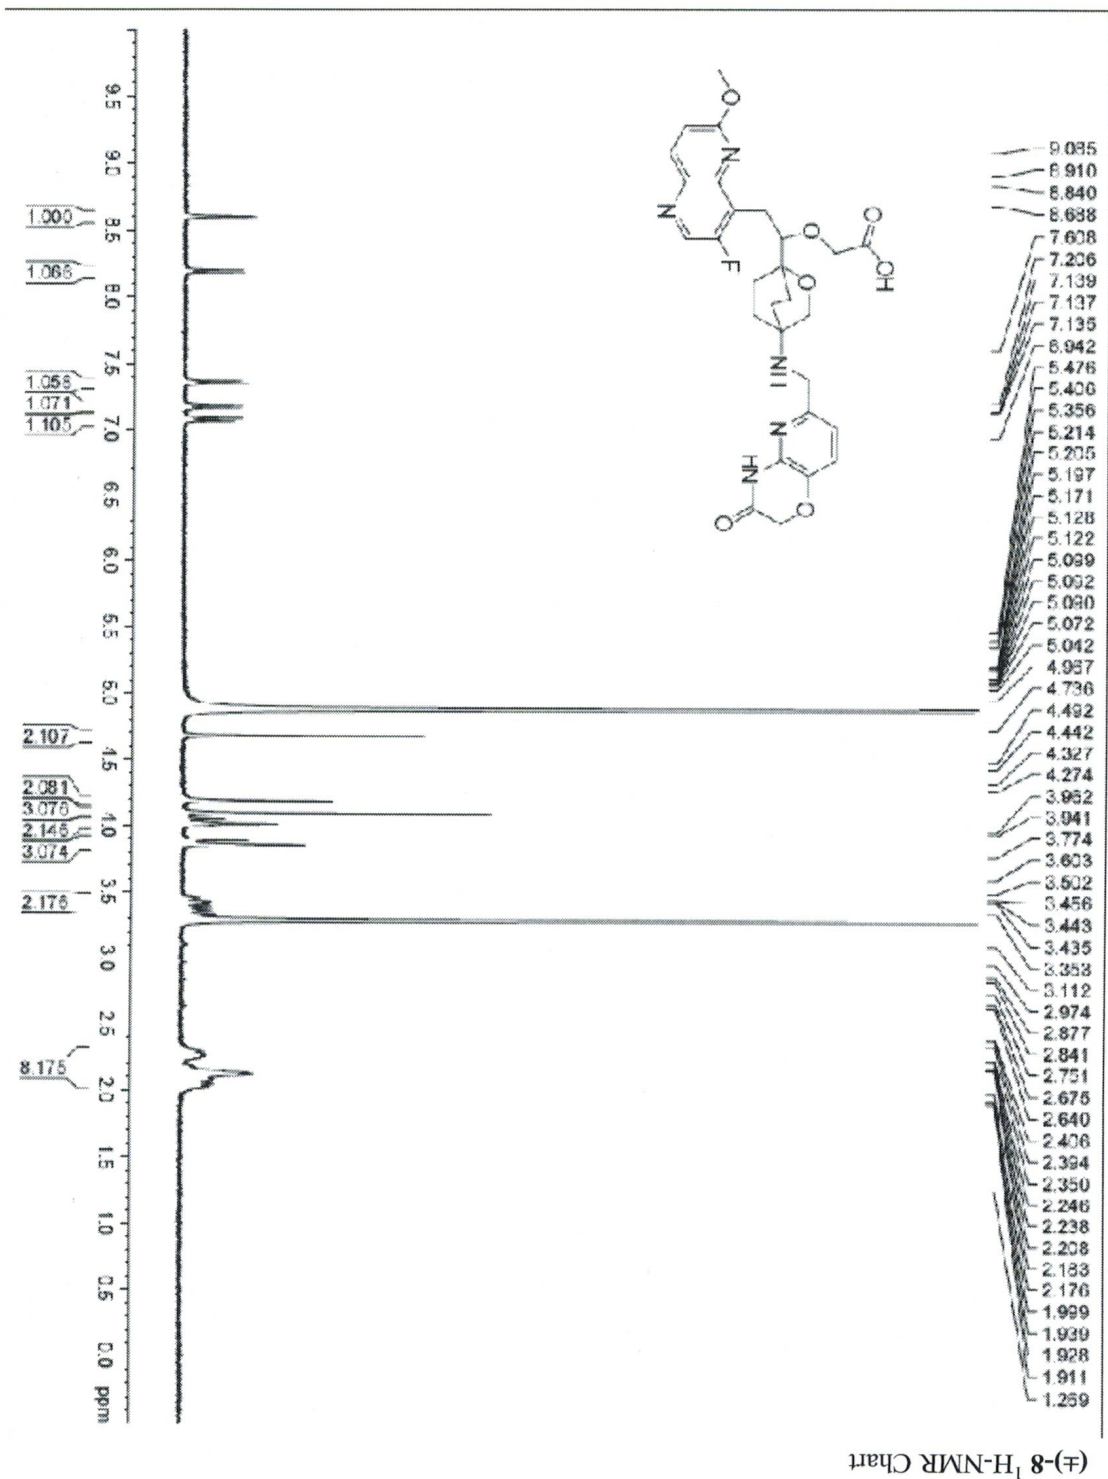

# Compound (±)-9

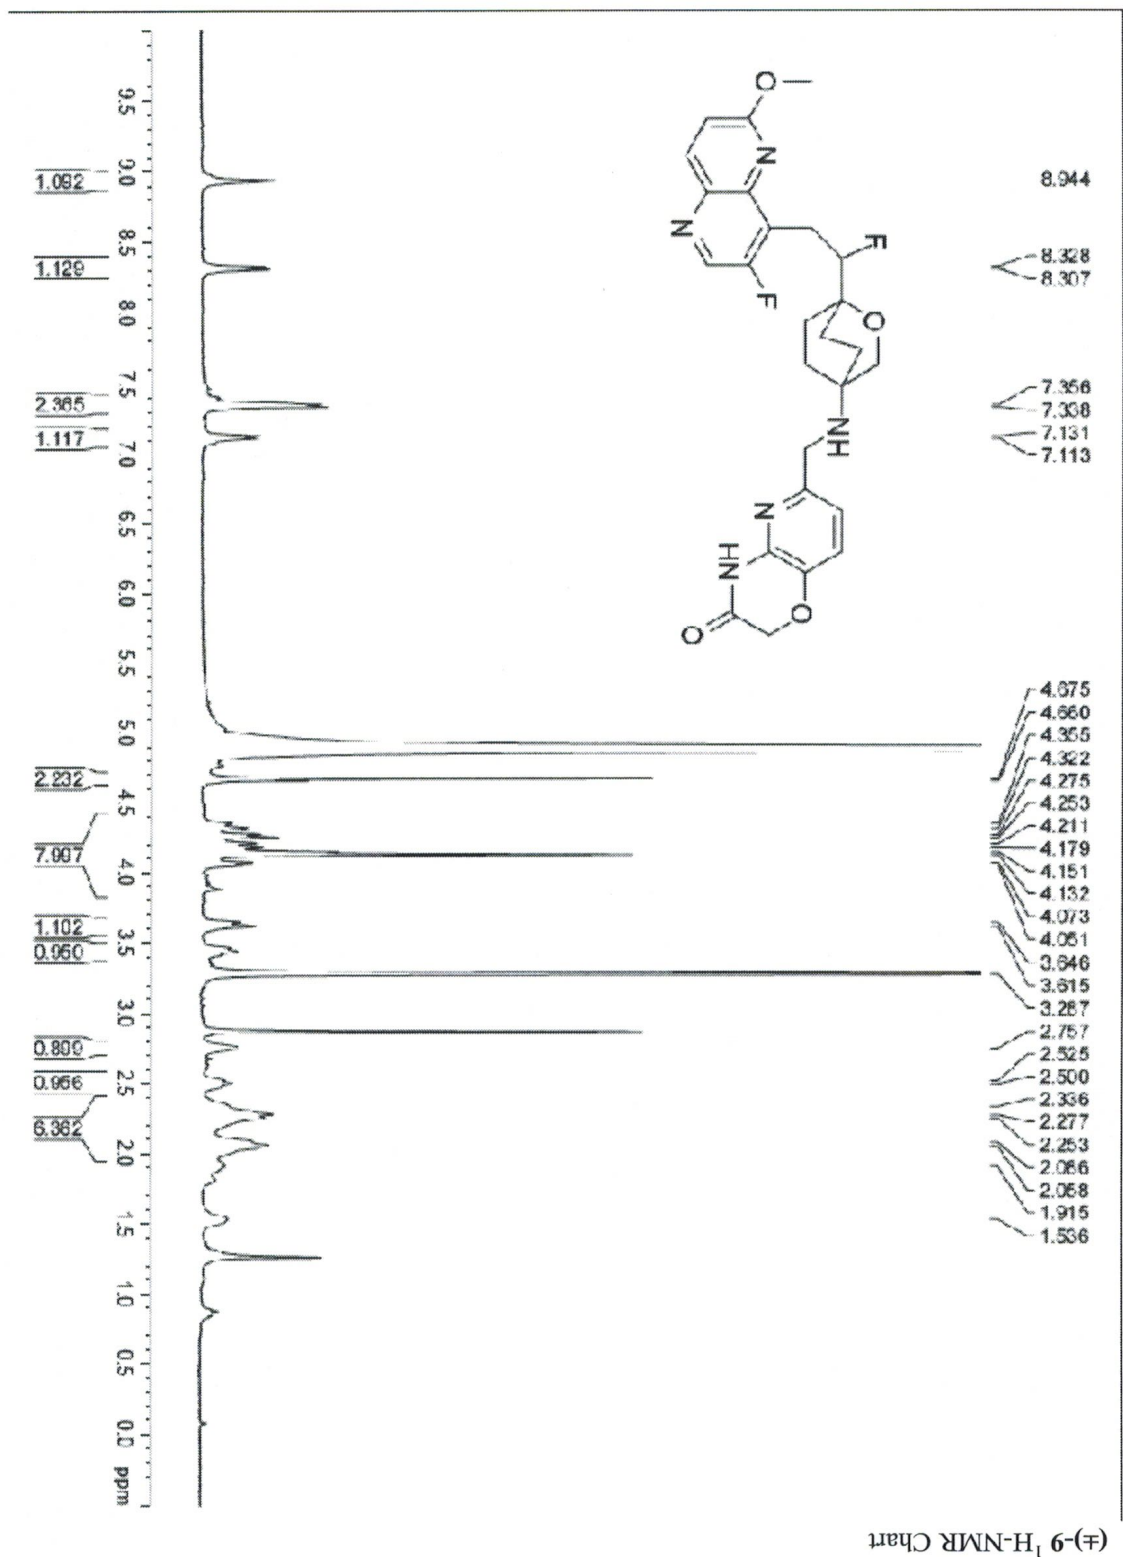

Compound C-10

136-08-013

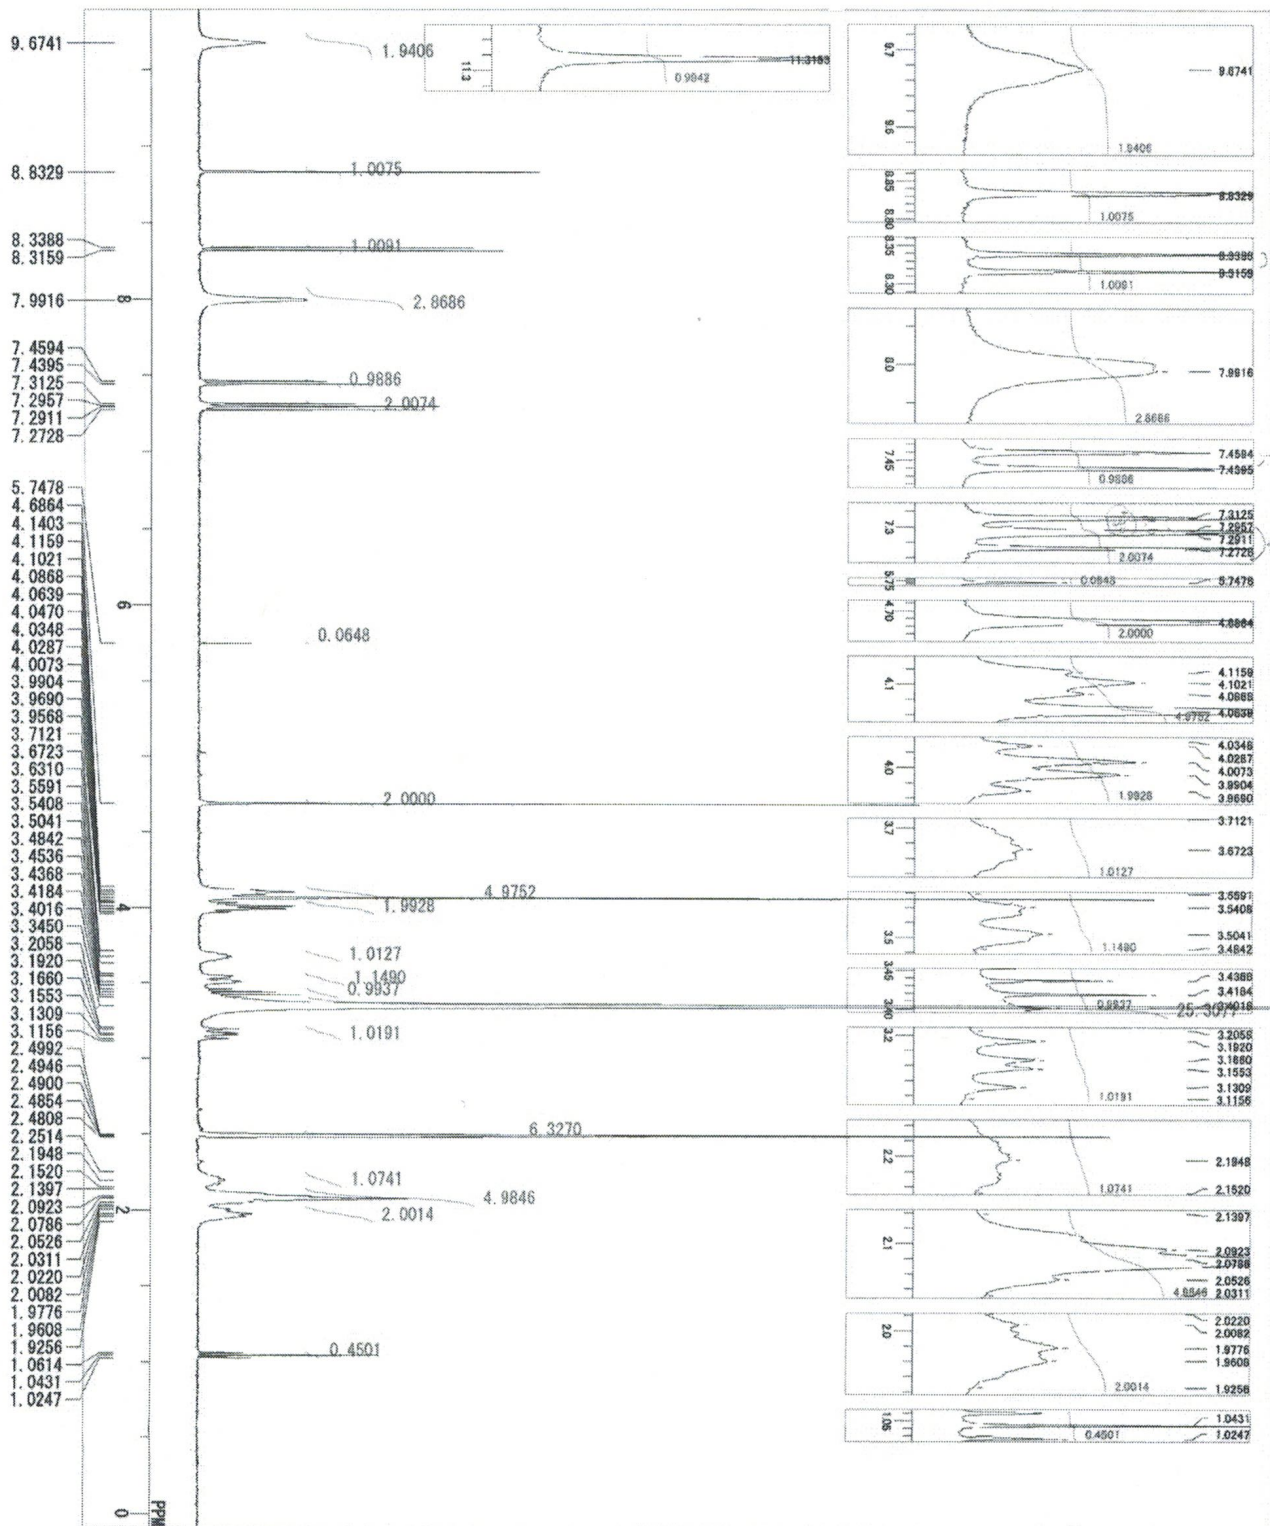

DF-FILE F:\COMPOUND-1-Y\136-08-013\data  
 COMPT 136-08-013 12-53:11  
 DATE 27-05-2010  
 ORIGIN 1H  
 EXPRO single pulse, ex2  
 ORPRO 395.88 MHz  
 ORSET 6.28 KHz  
 ORF IN 0.87 Hz  
 POINT 26213  
 FREQU 15872.77 Hz  
 SCANS 16  
 AQT 1.6515 sec  
 PD 5.0000 sec  
 PUL 5.10 usec  
 PRG 1H  
 CTEMP 22.4 C  
 SOLVENT DMSO  
 EXREF 2.49 ppm  
 BF 0.12 Hz  
 RGAIN 38  
 1H-NMR (DMSO-d6)  $\delta$ :  
 9.67 (2H, s),  
 8.83 (1H, s),  
 8.33 (1H, d, J = 9.1 Hz),  
 7.99 (3H, s),  
 7.45 (1H, d, J = 7.9 Hz),  
 7.29 (2H, dd, J = 8.8, 7.0 Hz),  
 5.75 (OH, s),  
 4.69 (2H, s),  
 4.09 (3H, q, J = 6.9 Hz),  
 4.00 (2H, dt, J = 20.4, 6.1 Hz),  
 3.69 (1H, d, J = 15.7 Hz),  
 3.52 (1H, dd, J = 22.1, 7.6 Hz),  
 3.43 (1H, q, J = 6.9 Hz),  
 3.34 (25H, s),  
 3.16 (1H, td, J = 15.0, 5.2 Hz),  
 2.50-2.48 (6H, m),  
 2.17 (1H, d, J = 17.0 Hz),  
 2.14-2.08 (3H, m),  
 2.02-1.93 (2H, m),  
 1.04 (OH, t, J = 7.3 Hz).

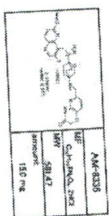

10, 05, 28  
 1/4 (17)  
 HX



Compound (+)-10

136-08-012

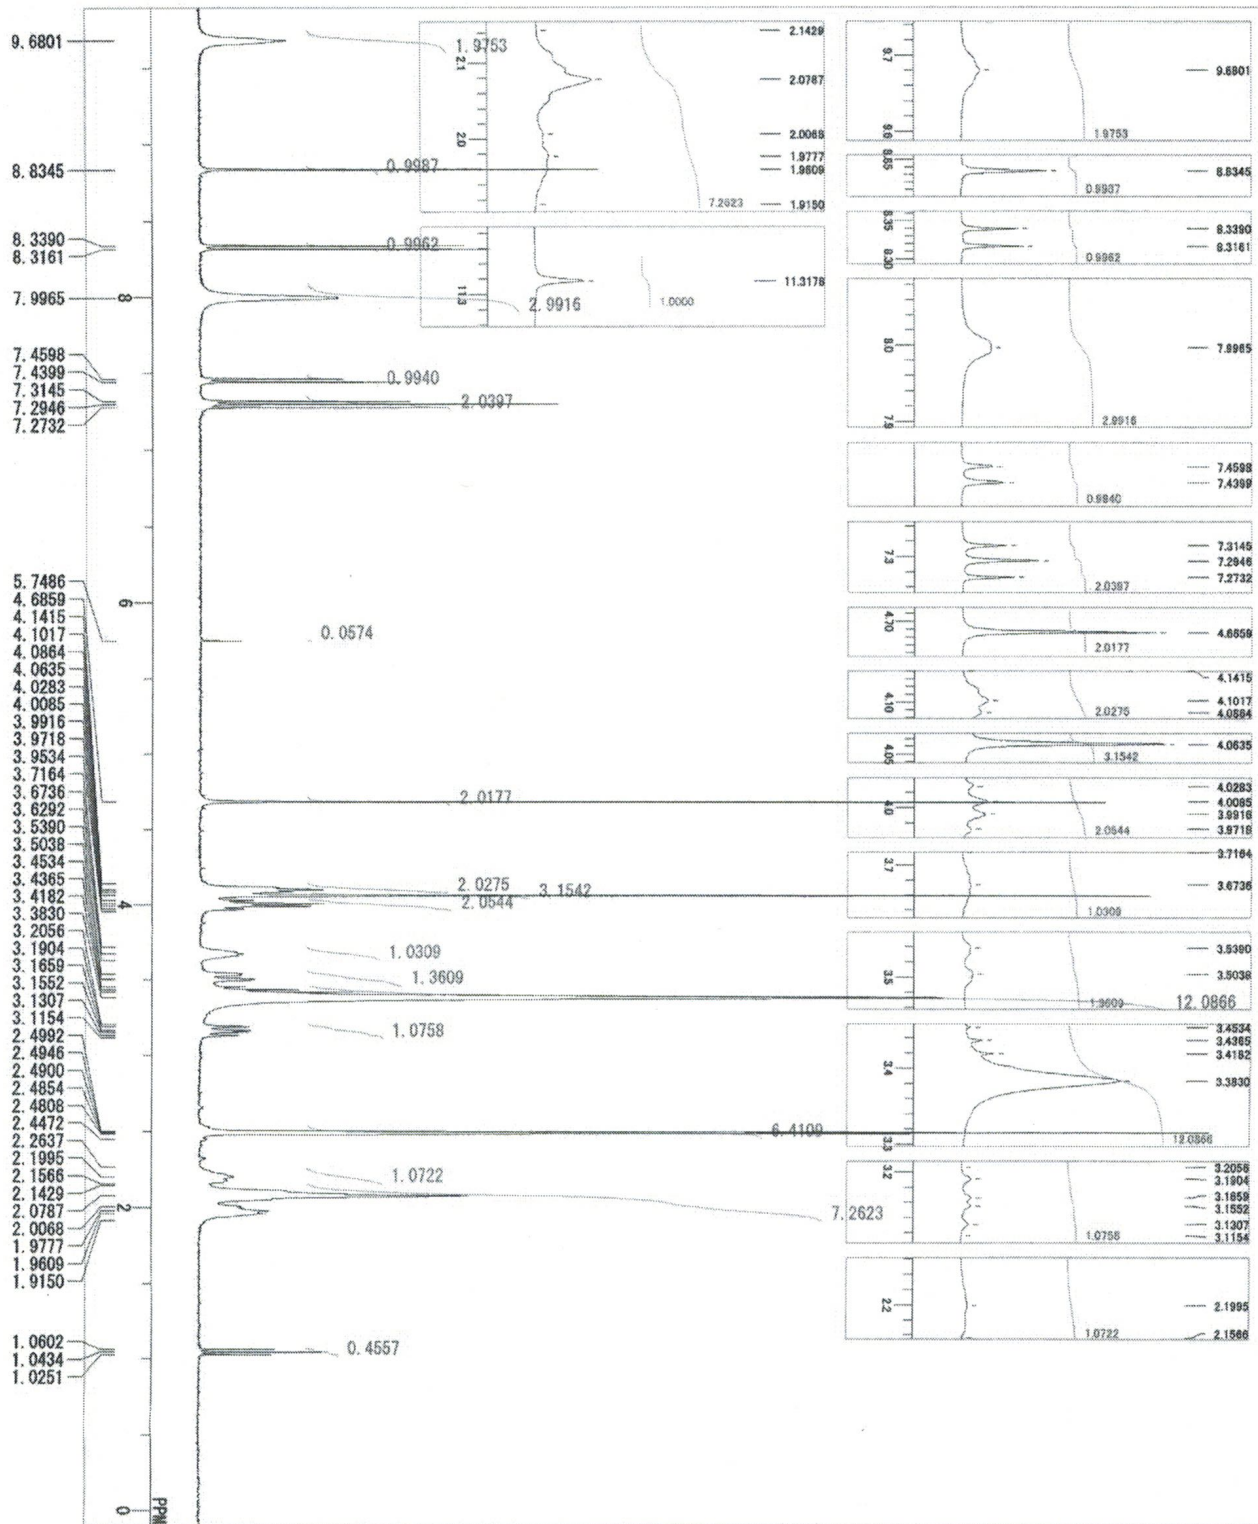

FILE F:\NMR\136-08-012  
 COUNT 136-08-012  
 DATE 24-05-2010 18:47:39  
 NAME 136-08-012  
 ORIGIN 136-08-012  
 PROC single pulse ex2  
 ORF 399.78 MHz  
 ORF 4.19 Hz  
 POINT 20969  
 FREQ 12820.12 Hz  
 SCANS 32  
 ACQTIME 1.6358 sec  
 PD 5.0000 sec  
 PUL 6.13 usec  
 PRG 136-08-012  
 CTEMP 22.0 C  
 SLEW 2.49 ppm  
 EXREF 0.12 Hz  
 RGAIN 40

**1H-NMR (DMSO-d6)  $\delta$ :**

- 9.68 (2H, s),
- 8.83 (1H, s),
- 8.33 (1H, d, J = 9.2 Hz),
- 8.00 (3H, s),
- 7.45 (1H, d, J = 7.9 Hz),
- 7.29 (2H, t, J = 8.3 Hz),
- 5.75 (2H, s),
- 4.69 (2H, s),
- 4.11 (2H, t, J = 11.0 Hz),
- 4.06 (3H, s),
- 4.00 (2H, q, J = 7.5 Hz),
- 3.67 (1H, t, J = 17.4 Hz),
- 3.52 (1H, d, J = 14.1 Hz),
- 3.42 (12H, q, J = 9.4 Hz),
- 3.16 (1H, td, J = 15.0, 5.5 Hz),
- 2.47 (6H, td, J = 6.6, 5.7 Hz),
- 2.18 (1H, td, J = 17.1 Hz),
- 2.03 (7H, dt, J = 49.9, 19.9 Hz),
- 1.04 (OH, t, J = 7.0 Hz).

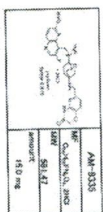

10, 0.5-1.5  
 1/2

# Compound (±)-11

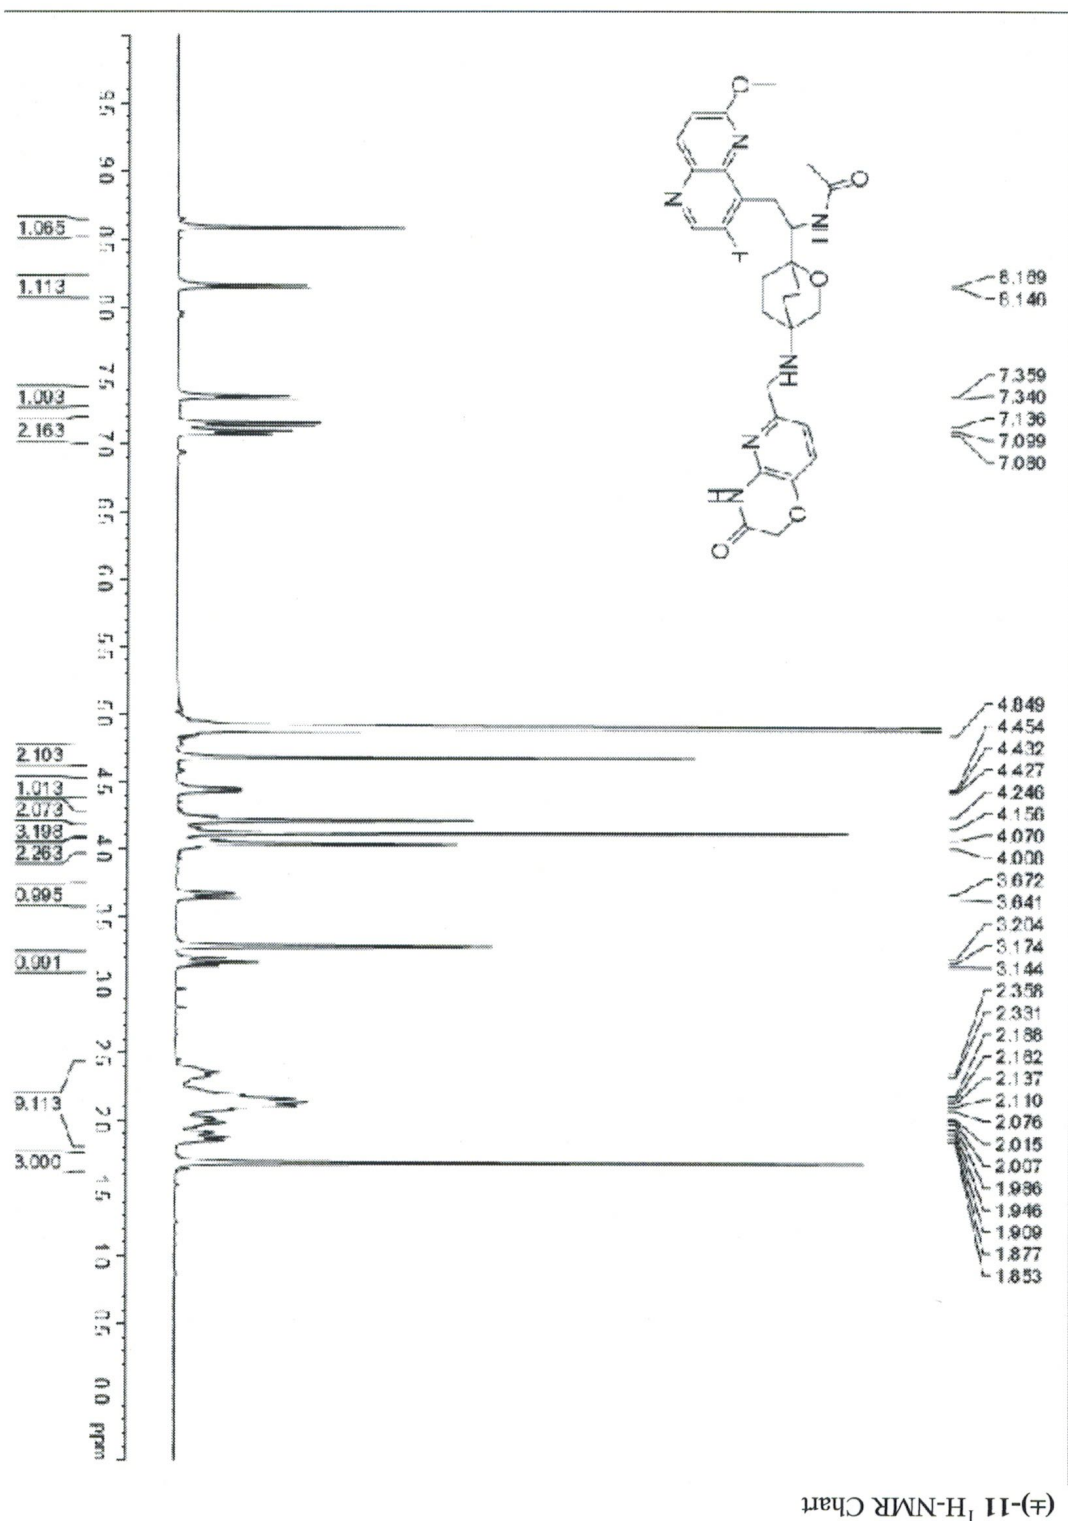

Compound (±)-12

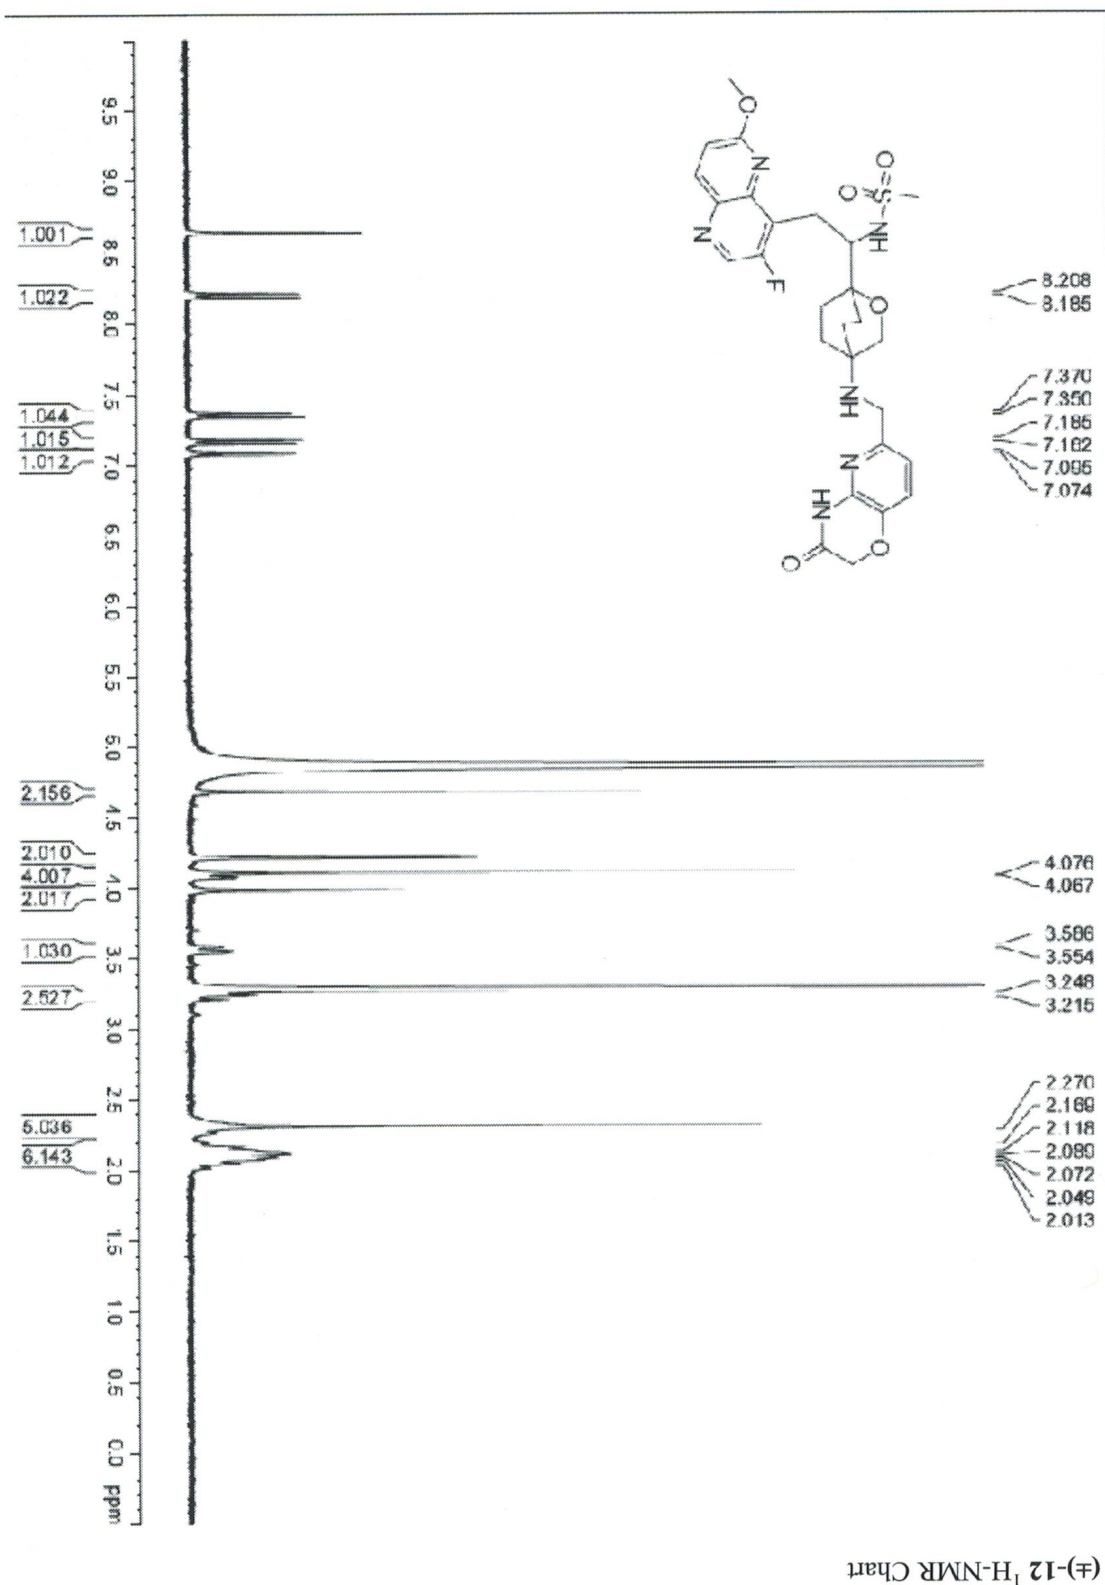



# Compound 13

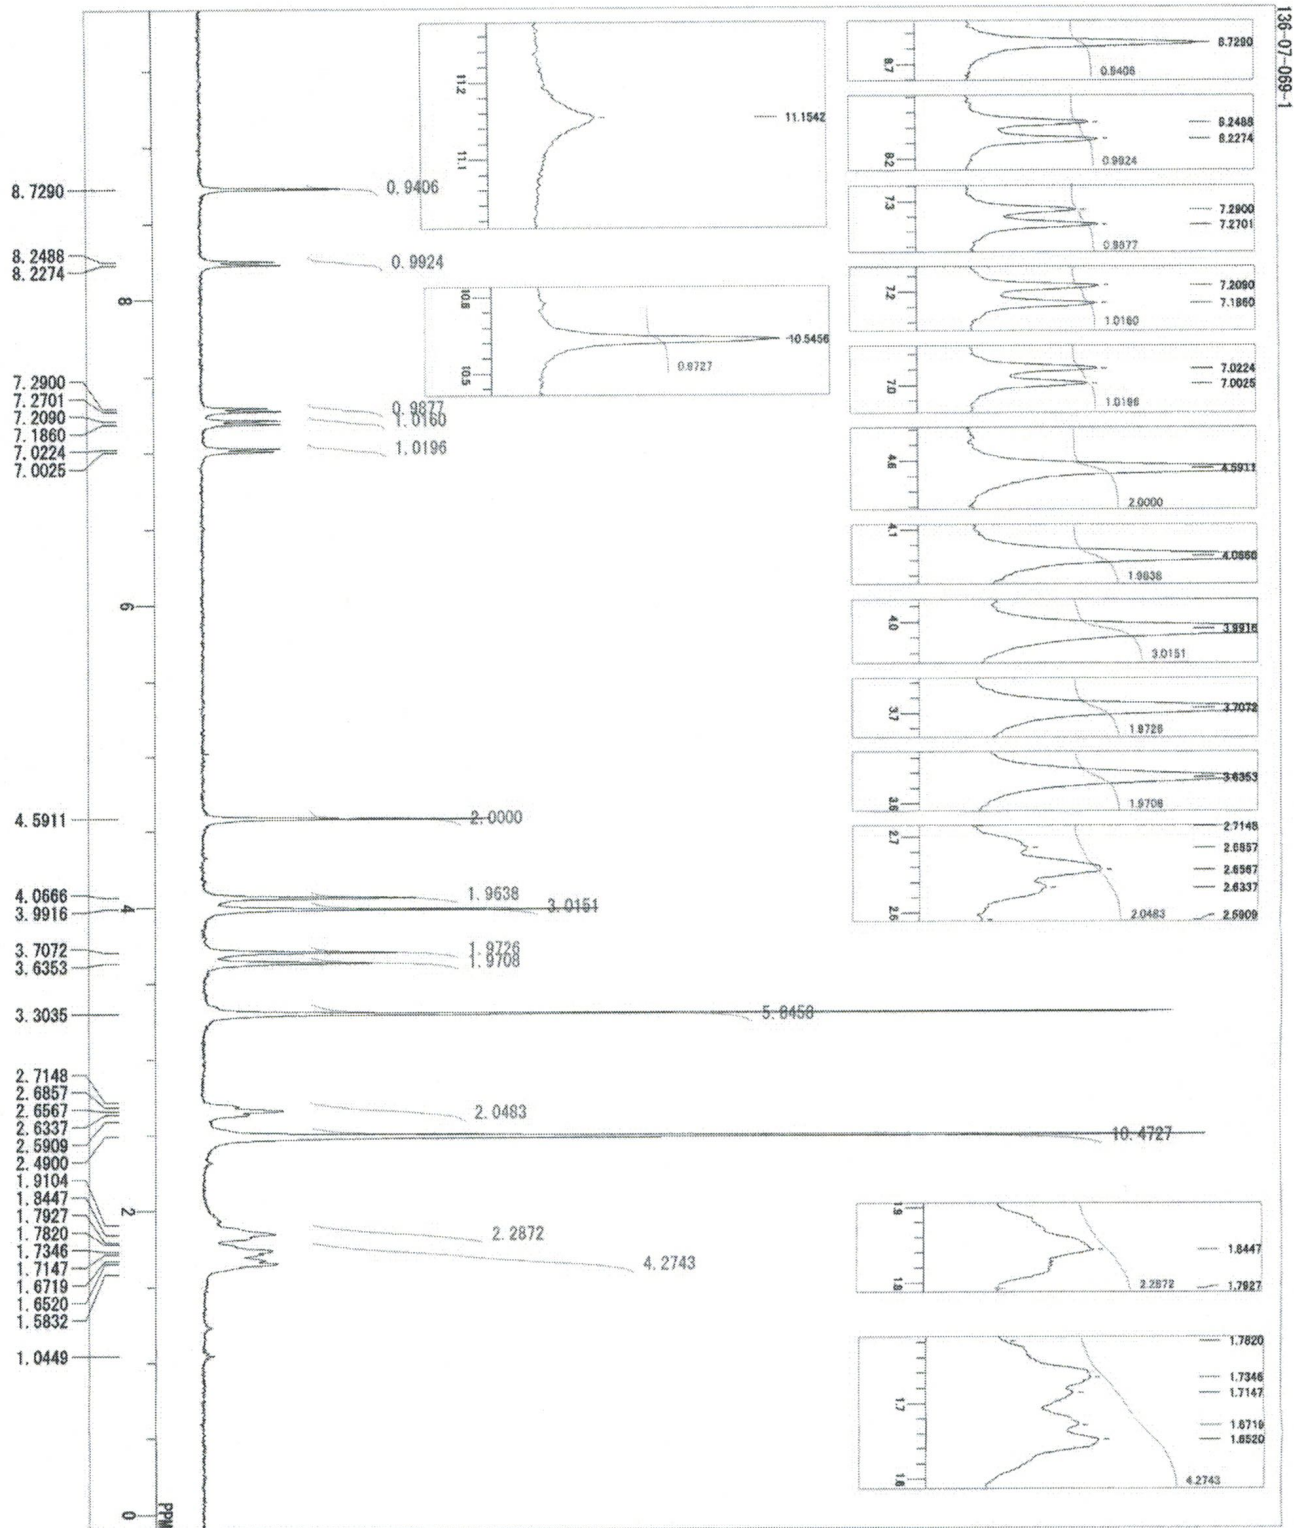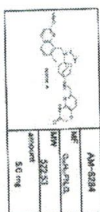

<sup>1</sup>H-NMR (DMSO-d<sub>6</sub>) δ:

- 8.73 (1H, s)
- 8.24 (1H, d, J = 8.6 Hz)
- 7.28 (1H, d, J = 7.9 Hz)
- 7.20 (1H, d, J = 9.2 Hz)
- 7.01 (1H, d, J = 7.9 Hz)
- 4.07 (2H, s)
- 3.99 (3H, s)
- 3.71 (2H, s)
- 3.64 (2H, s)
- 3.30 (6H, s)
- 2.71-2.59 (2H, m)
- 2.49 (10H, s)
- 1.82 (2H, d, J = 20.8 Hz)
- 1.78-1.65 (4H, m)

DF LLE F:\NONMR\13-07-069-1  
 COUNT 136-07-069-1  
 DATE 09-04-2010 11:46:13  
 NAME 13  
 EXCD 1H  
 OBSF 399.78 MHz  
 OBSF 4.19 kHz  
 POINT 26213  
 FREQ 16025.40 Hz  
 SCANS 32  
 ACQTM 1.6358 sec  
 PD 5.0000 sec  
 PFI 6.13 usec  
 INDC 1H  
 CTMP 24.7 °C  
 SLVT DMSO  
 EXREF 2.49 ppm  
 BF 0.52 Hz  
 RGAIN 40

10.08.09  
 10.08.09

Compound 14

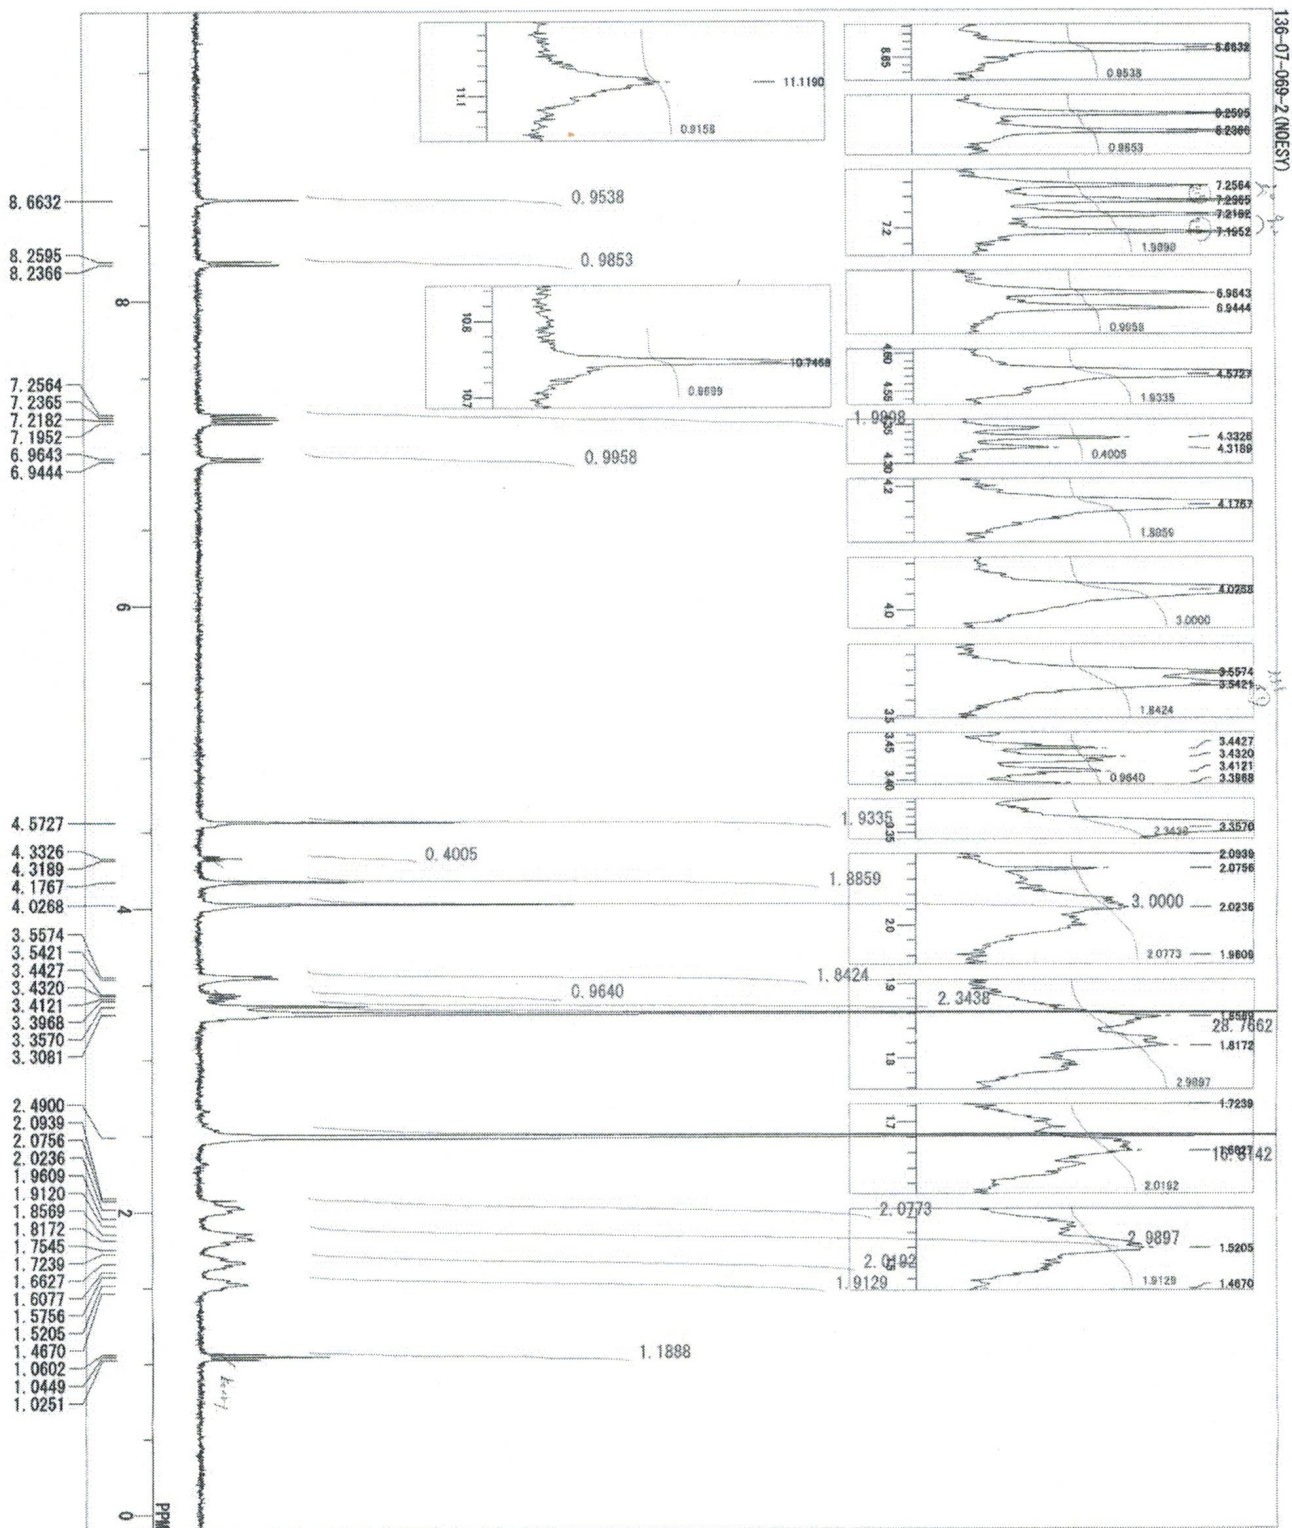

DE FILE F:\KONMR\14-1\14-1.D  
 COUNT 136-07-069-2 (NOESY)  
 DATE 10-04-2010 18:55:19  
 NAME 14  
 CONTC 1  
 EXMD Single Pulse ex2  
 OFNO 399.78 MHz  
 OFST 4.19 Hz  
 OFIN 7.29 Hz  
 POINT 26213  
 FREQ 16025.40 Hz  
 SCANS 16  
 ACQTM 1.6358 sec  
 PD 5.0000 sec  
 PUL 6.13 usec  
 PRG 14  
 CTAP 24.0 c  
 SLVNT DMSO  
 EXREF 2.49 ppm  
 BR 0.12 Hz  
 RGAIN 40  
 1H-NMR (DMSO-d6)  $\delta$ :  
 8.66 (1H, s),  
 8.25 (1H, d,  $J = 9.2$  Hz),  
 7.23 (2H, q,  $J = 8.2$  Hz),  
 6.95 (1H, d,  $J = 7.9$  Hz),  
 4.57 (2H, s),  
 4.33 (2H, d,  $J = 5.5$  Hz),  
 4.18 (2H, s),  
 4.03 (3H, s),  
 3.55 (2H, d,  $J = 6.1$  Hz),  
 3.42 (1H, dd,  $J = 13.1, 5.2$  Hz),  
 3.36 (2H, s),  
 3.31 (29H, s),  
 2.49 (17H, s),  
 2.03 (2H, dd,  $J = 37.0, 16.2$  Hz),  
 1.84 (3H, d,  $J = 15.9$  Hz),  
 1.67 (2H, t,  $J = 23.2$  Hz),  
 1.49 (2H, d,  $J = 21.4$  Hz),  
 1.04 (1H, t,  $J = 7.0$  Hz).

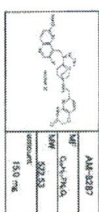

10, 04, 10  
 14-1  
 14-1



Compound 15

136-08-005

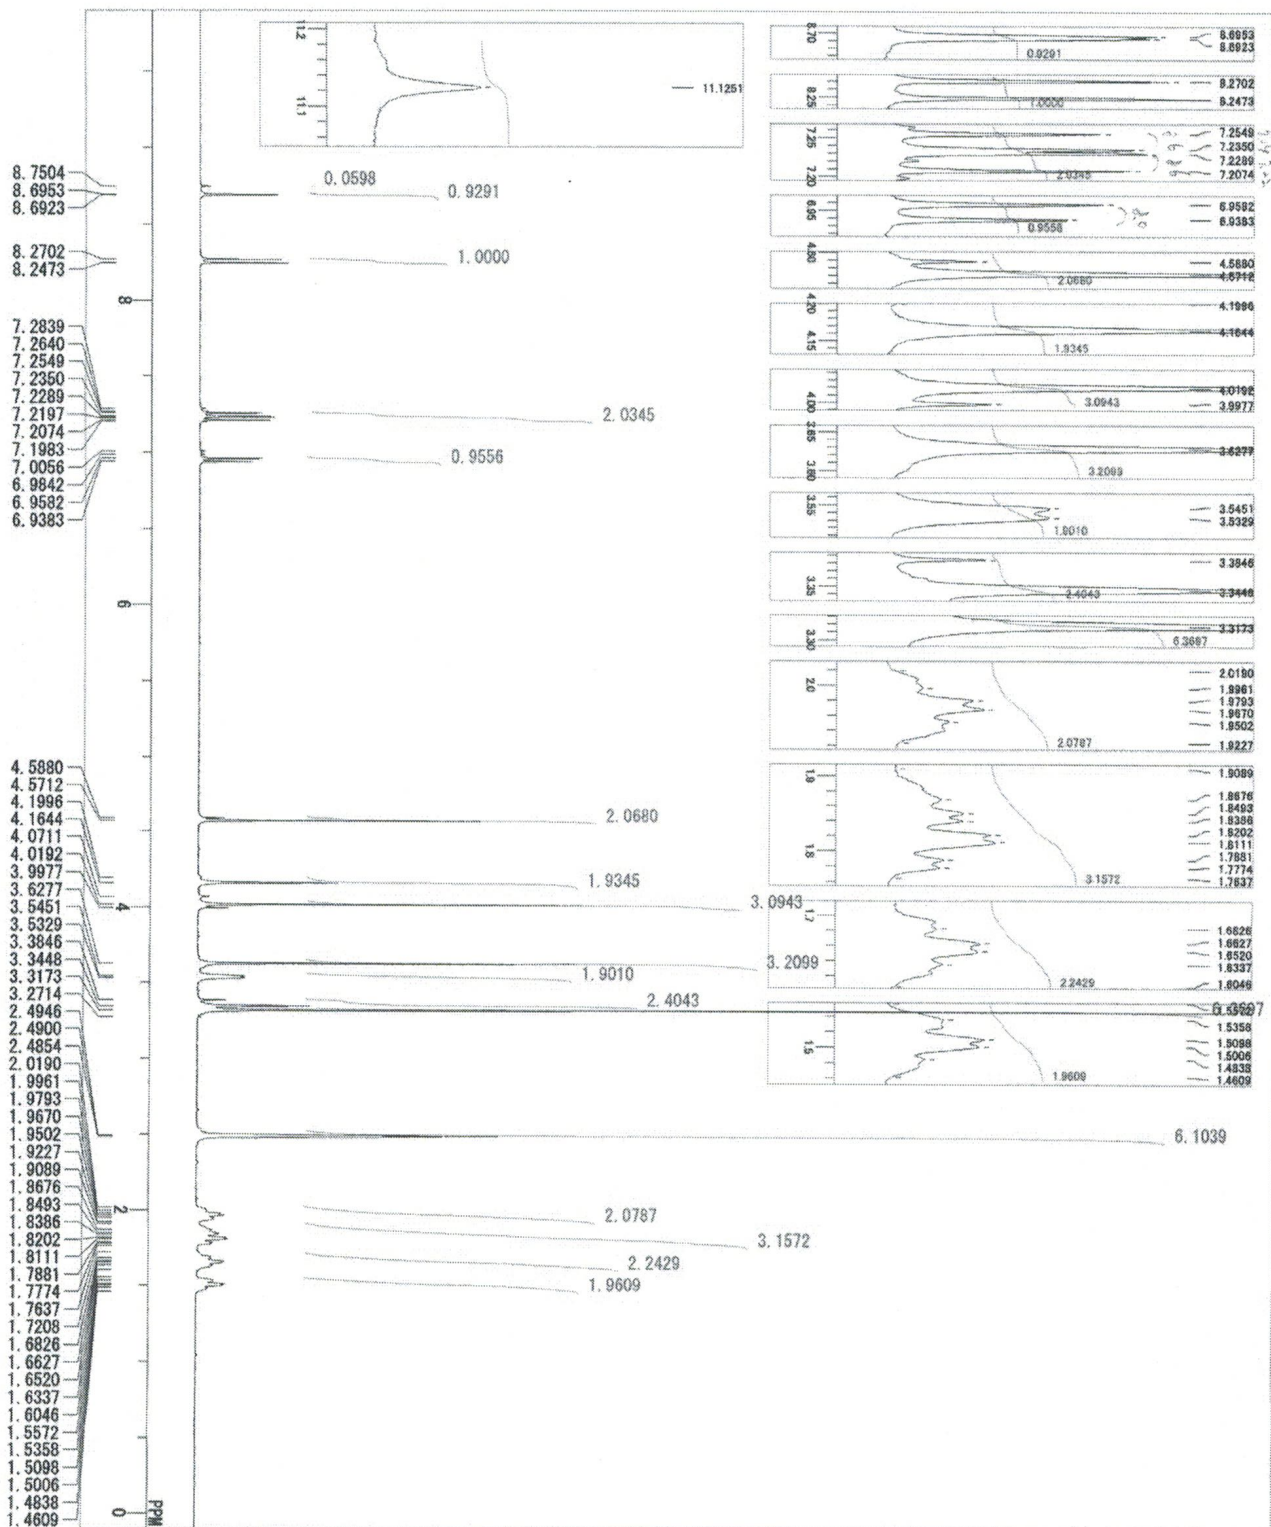

FILE: F:\NMR\136-08-005-15-001\data\136-08-005-15-001-001.f2  
 COUNT: 136-08-005-15-001-001-001  
 DATE: 25-05-2010 18:55:58  
 NAME: 15  
 OBSFREQ: 399.78 MHz  
 OBSF1: 4.19 KHz  
 OBSF2: 7.29 KHz  
 POINT: 26213  
 FREQ: 16025.40 Hz  
 SCANS: 32  
 ACQTIME: 1.6358 sec  
 PD: 5.0000 sec  
 PULPROG: 6.13 usec  
 IPRNUC: 1H  
 CTEMP: 21.7 C  
 SYNT: DMSO  
 EXREF: 2.49 ppm  
 RF: 0.12 Hz  
 RGAIN: 38

1H-NMR (DMSO-d6)  $\delta$ :  
 8.75 (OH, s),  
 8.69 (1H, d, J = 1.2 Hz),  
 8.26 (1H, d, J = 9.2 Hz),  
 7.26-7.20 (2H, m),  
 6.95 (1H, d, J = 7.9 Hz),  
 4.58 (2H, d, J = 6.7 Hz),  
 4.18 (2H, d, J = 14.1 Hz),  
 4.01 (3H, d, J = 6.6 Hz),  
 3.63 (3H, s),  
 3.54 (2H, d, J = 4.9 Hz),  
 3.36 (2H, d, J = 15.9 Hz),  
 3.32 (6H, s),  
 2.49 (6H, t, J = 1.8 Hz),  
 1.97 (2H, dt, J = 20.6, 8.4 Hz),  
 1.84 (3H, tt, J = 18.0, 7.4 Hz),  
 1.68-1.60 (2H, m),  
 1.51 (2H, dt, J = 21.0, 8.7 Hz).

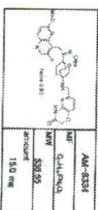

15, 65, 25  
 1/2, 65, 25  
 1/2, 65, 25

# Compound (±)-16

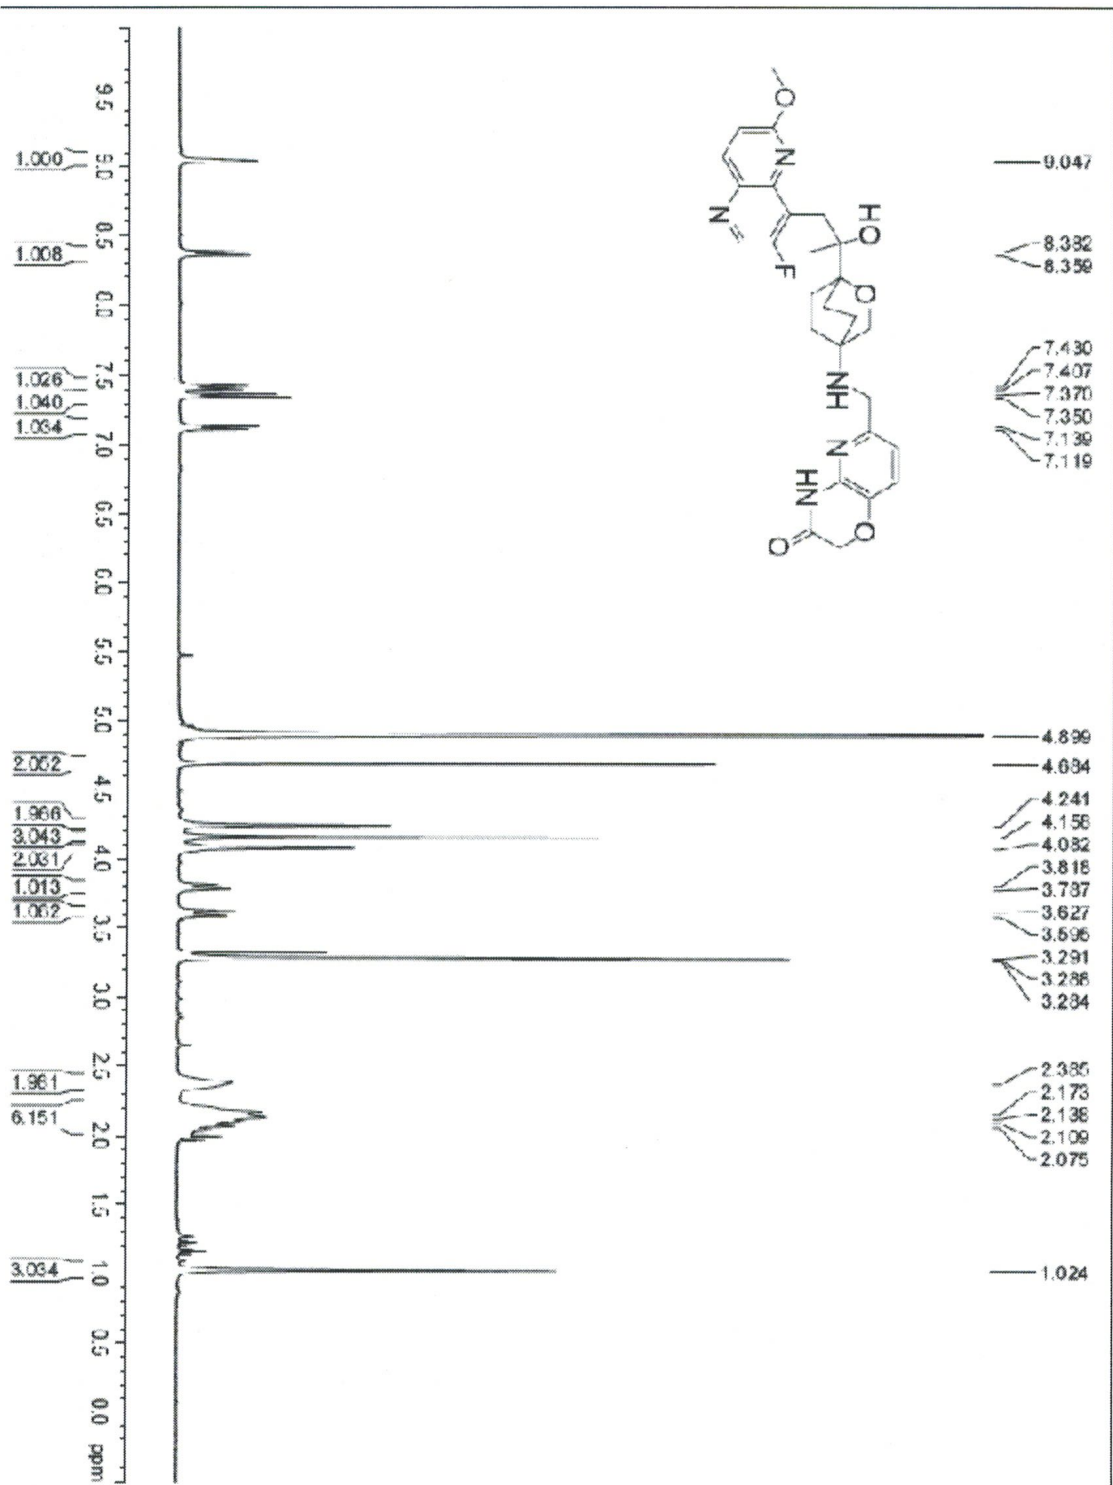

(±)-16 <sup>1</sup>H-NMR Chart

# Compound (±)-17

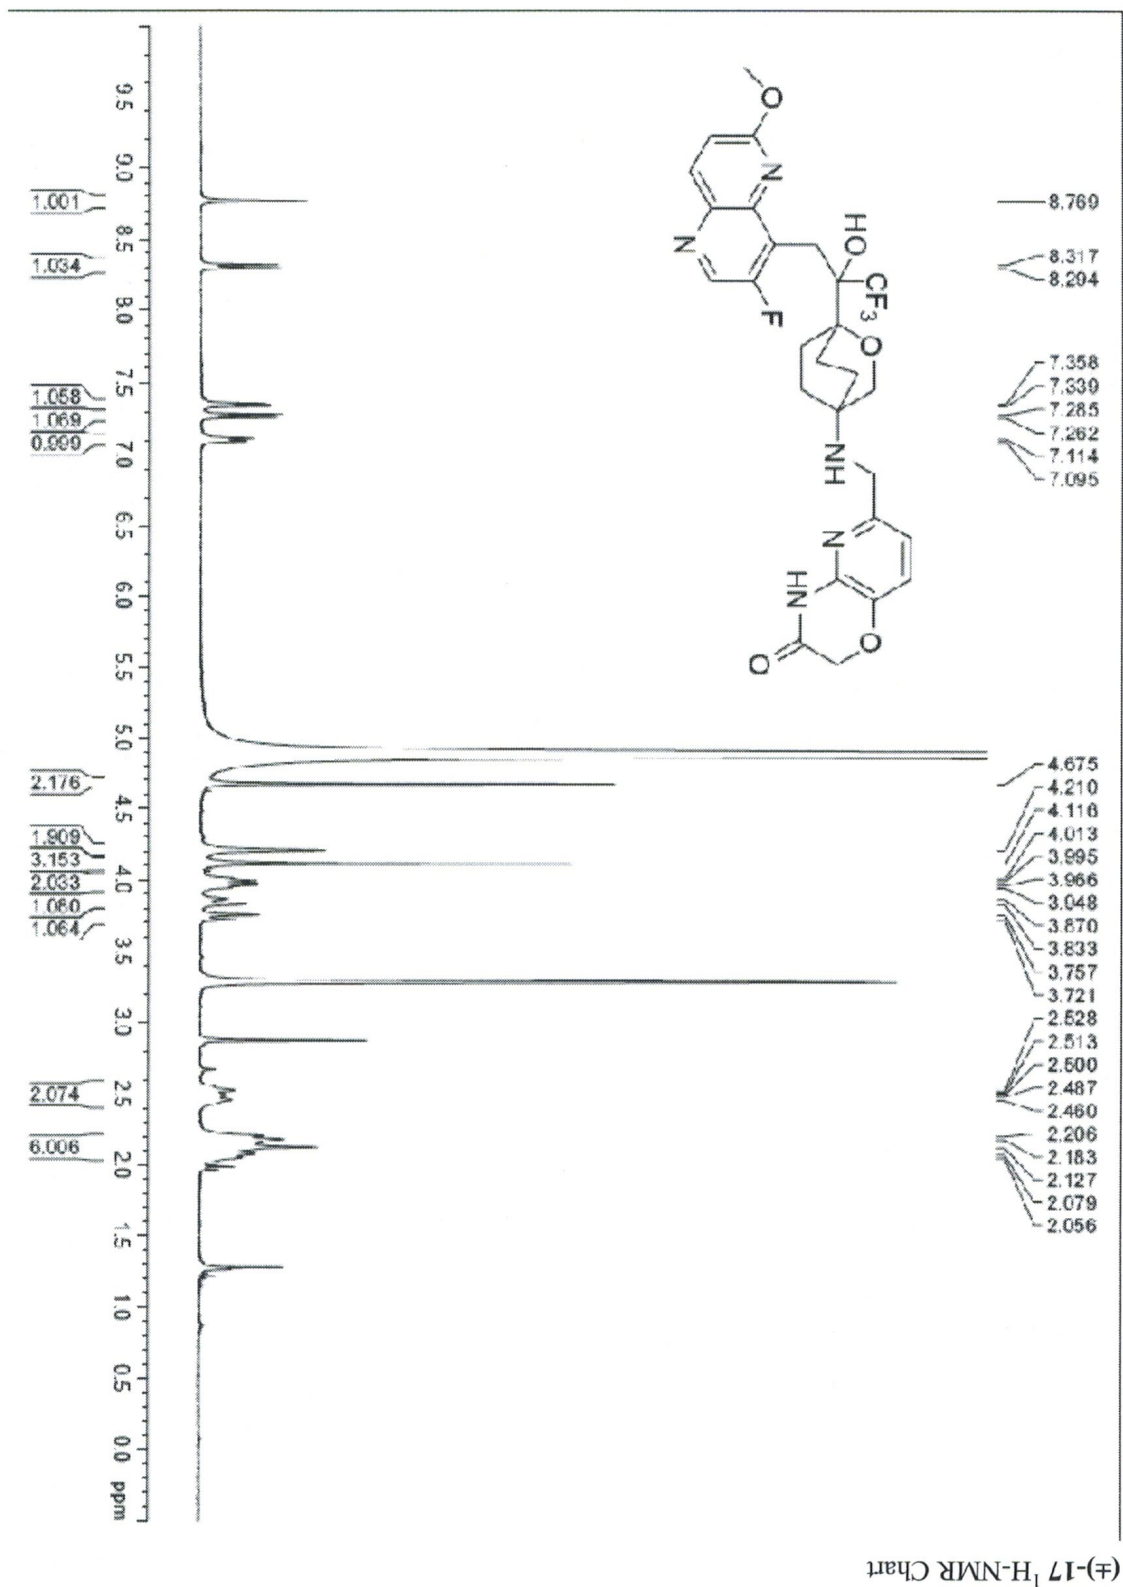

# Compound 18

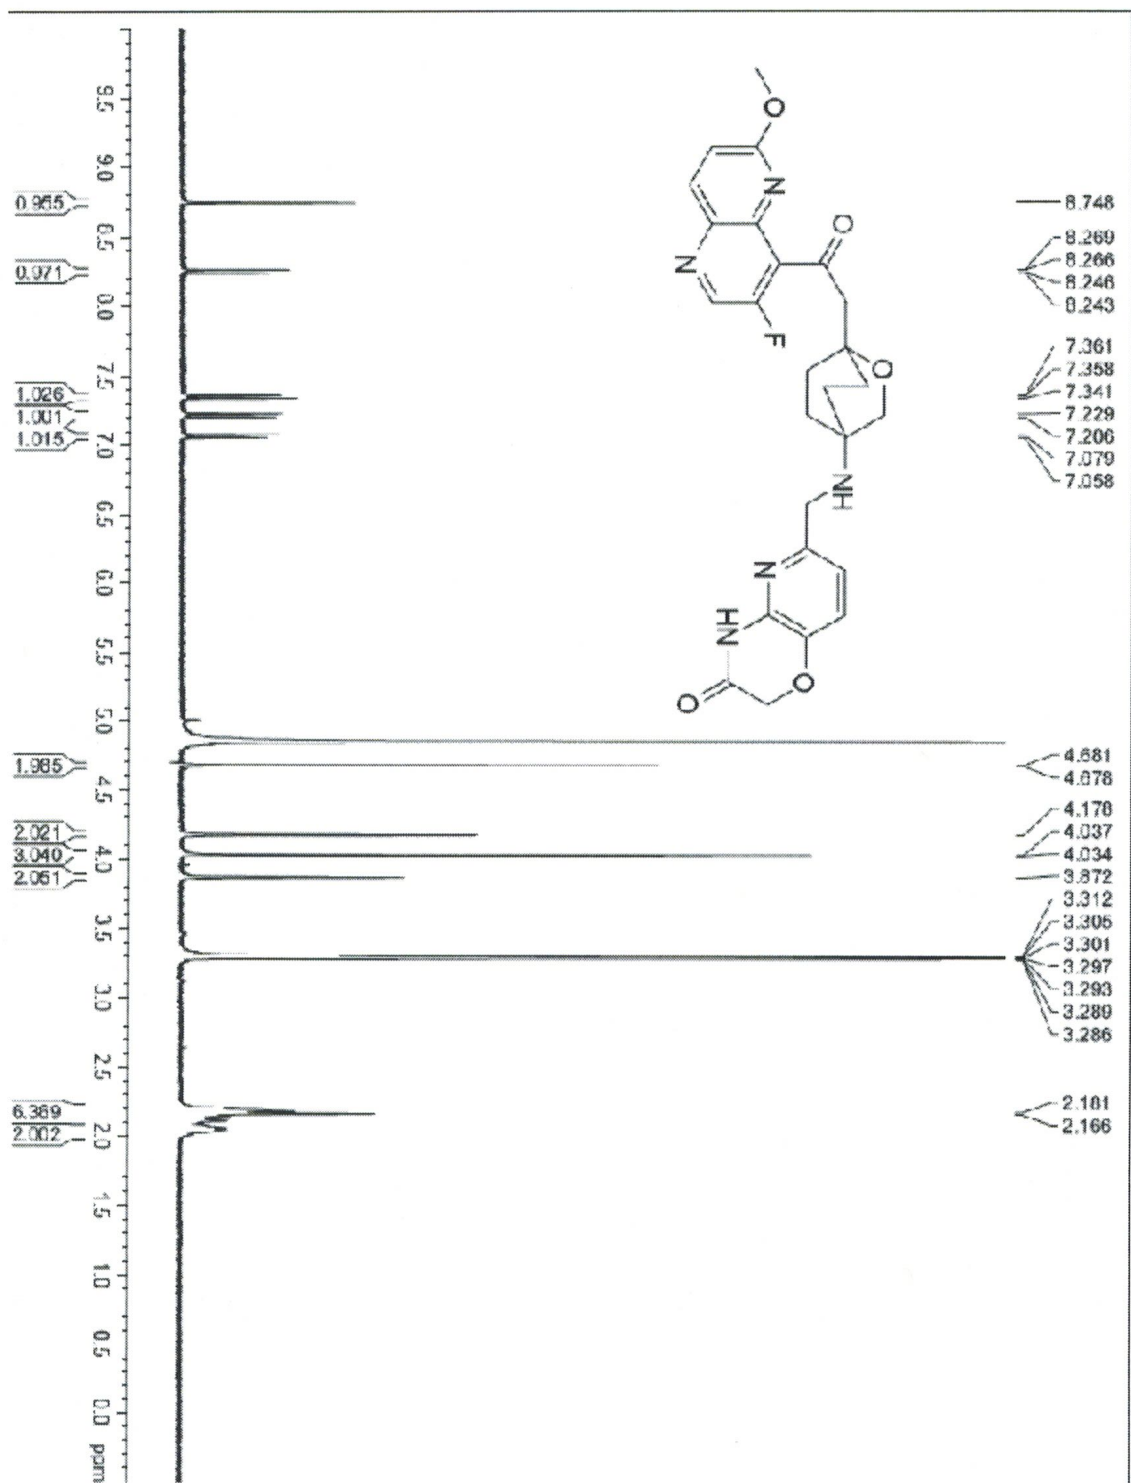



Compound (-)-19

136-09-063

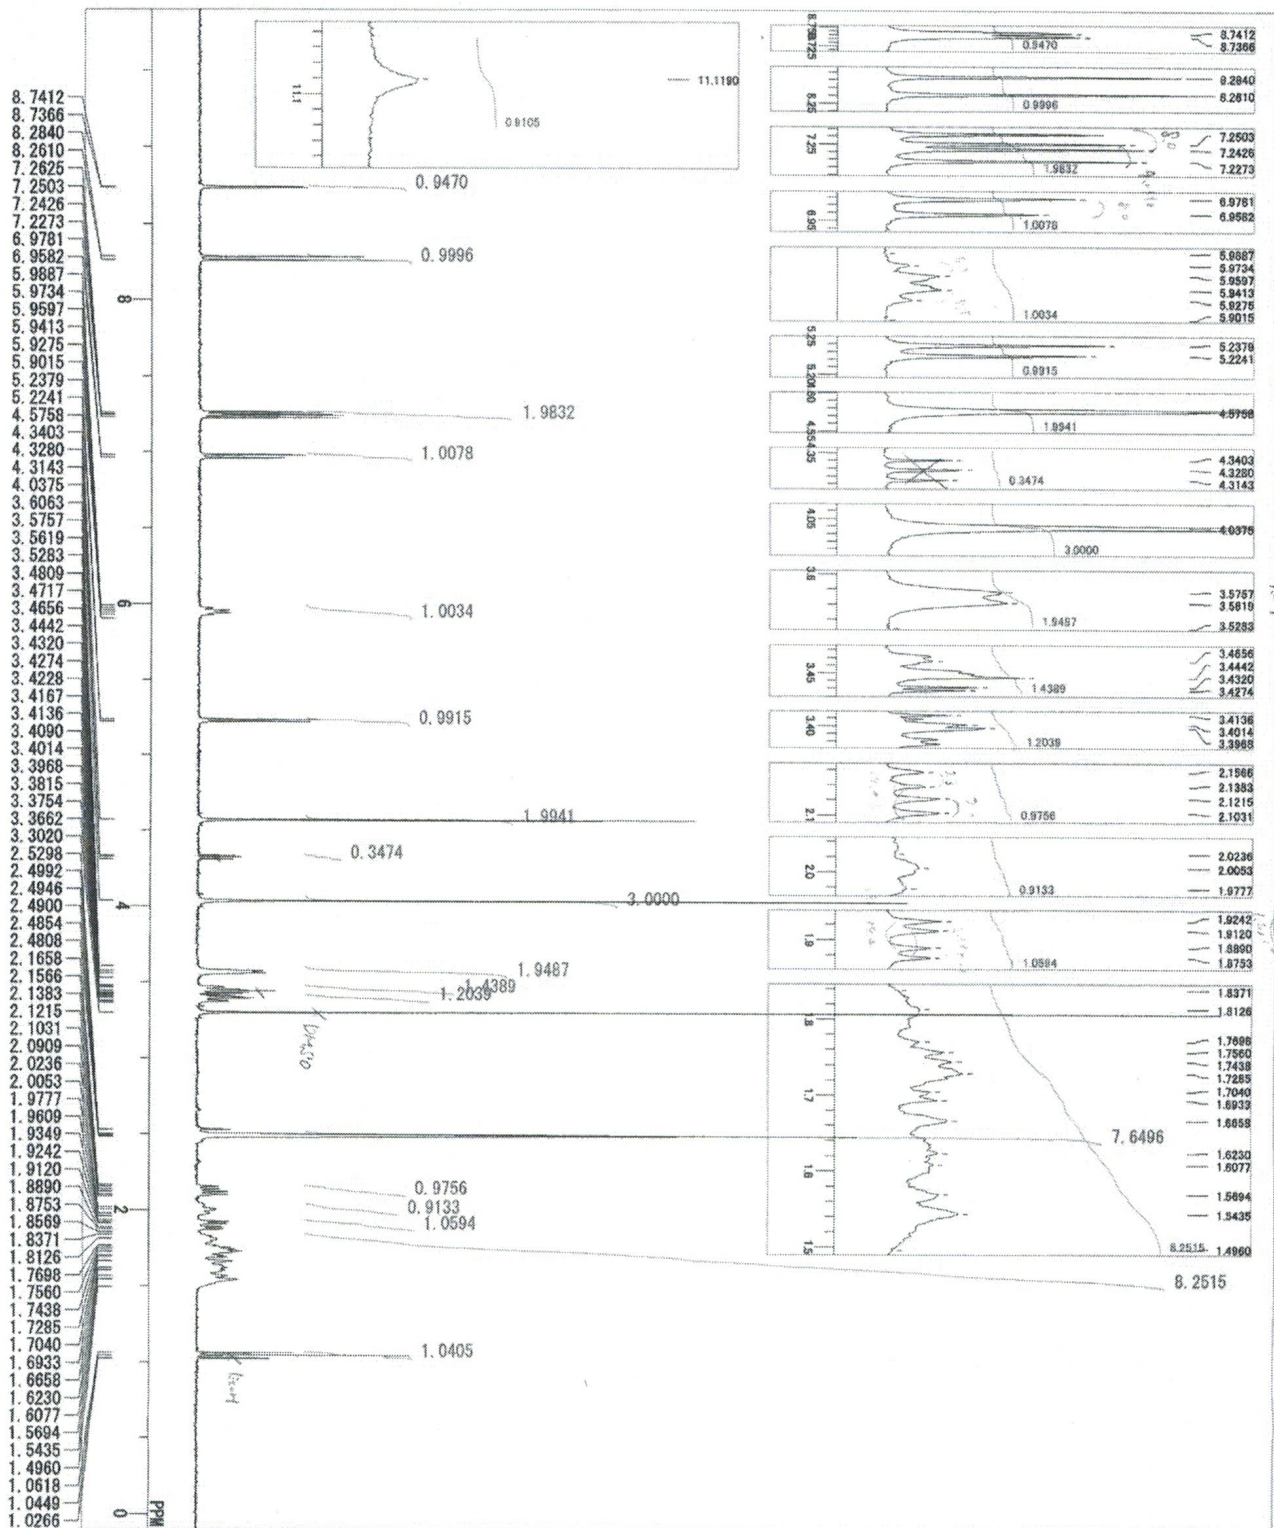

1H-NMR (DMSO-d6)  $\delta$ :  
 8.74 (1H, d, J = 1.8 Hz),  
 8.27 (1H, d, J = 9.2 Hz),  
 7.24 (2H, q, J = 4.7 Hz),  
 6.97 (1H, d, J = 7.9 Hz),  
 5.95 (1H, dd, J = 13.3, 7.9 Hz),  
 5.23 (1H, d, J = 5.5 Hz),  
 4.58 (2H, s),  
 4.33 (3H, t, J = 5.2 Hz),  
 4.04 (3H, s),  
 3.55 (2H, t, J = 9.5 Hz),  
 3.48-3.42 (1H, m),  
 3.42-3.38 (1H, m),  
 2.50-2.48 (8H, m),  
 2.13 (1H, dt, J = 19.4, 5.8 Hz),  
 2.00 (1H, t, J = 9.2 Hz),  
 1.93-1.88 (1H, m),  
 1.84-1.50 (8H, m),  
 1.04 (1H, t, J = 7.0 Hz).

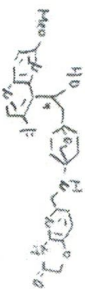

(-)-19

Expt: 0.15 (100%)

10, 11, 18  
5% (10) 10%

136-09-062

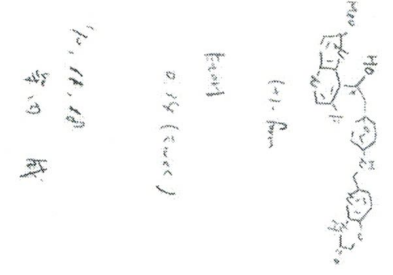

|        |                        |
|--------|------------------------|
| NAME   | F-CONJNR-CY-トナリ薬田iniba |
| COMT   | 136-09-062             |
| DATIM  | 18-11-2010 18:35:59    |
| EXMOD  | string pulse ex2       |
| OSFRQ  | 399.78 MHz             |
| OBSSET | 4.19 kHz               |
| POLINT | 7.29 Hz                |
| POINT  | 32768                  |
| FREQLO | 20032.05 Hz            |
| SCANS  | 16                     |
| AQTIME | 1.6358 sec             |
| PD     | 5.0000 sec             |
| PRTI   | 5.02 usec              |
| TNAME  | 1H                     |
| CTEMP  | 24.9 c                 |
| SOLVE  | DMSO                   |
| EXREF  | 2.49 ppm               |
| BFF    | 0.12 Hz                |
| RGAIN  | 40                     |

1H-NMR (DMSO-d<sub>6</sub>) δ:

|                           |                           |                           |                           |                           |                           |               |                           |               |                           |               |                           |                                  |                    |                             |                                  |                                  |                            |                    |                                          |                           |
|---------------------------|---------------------------|---------------------------|---------------------------|---------------------------|---------------------------|---------------|---------------------------|---------------|---------------------------|---------------|---------------------------|----------------------------------|--------------------|-----------------------------|----------------------------------|----------------------------------|----------------------------|--------------------|------------------------------------------|---------------------------|
| 8.74 (1H, d, J = 1.8 Hz), | 8.27 (1H, d, J = 9.2 Hz), | 7.28 (1H, d, J = 4.9 Hz), | 7.23 (1H, d, J = 6.1 Hz), | 6.97 (1H, d, J = 7.9 Hz), | 5.95 (1H, d, J = 7.3 Hz), | 5.75 (OH, s), | 5.23 (1H, d, J = 5.5 Hz), | 4.58 (2H, s), | 4.33 (OH, t, J = 5.2 Hz), | 4.04 (CH, s), | 3.57 (2H, d, J = 5.5 Hz), | 3.46 (1H, dt, J = 10.2, 4.7 Hz), | 3.42-3.38 (1H, m), | 3.32 (18H, d, J = 16.5 Hz), | 2.50 (20H, dt, J = 8.6, 4.1 Hz), | 2.31 (1H, dt, J = 21.0, 6.4 Hz), | 2.01 (1H, d, J = 40.0 Hz), | 1.93-1.88 (dd, m), | 1.65 (OH, ddd, J = 69.5, 31.9, 20.0 Hz), | 1.04 (1H, t, J = 7.0 Hz). |
|---------------------------|---------------------------|---------------------------|---------------------------|---------------------------|---------------------------|---------------|---------------------------|---------------|---------------------------|---------------|---------------------------|----------------------------------|--------------------|-----------------------------|----------------------------------|----------------------------------|----------------------------|--------------------|------------------------------------------|---------------------------|



# Compound (±)-20

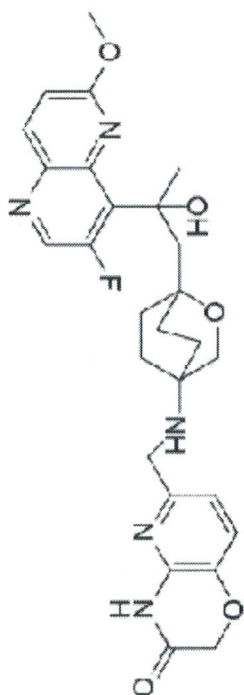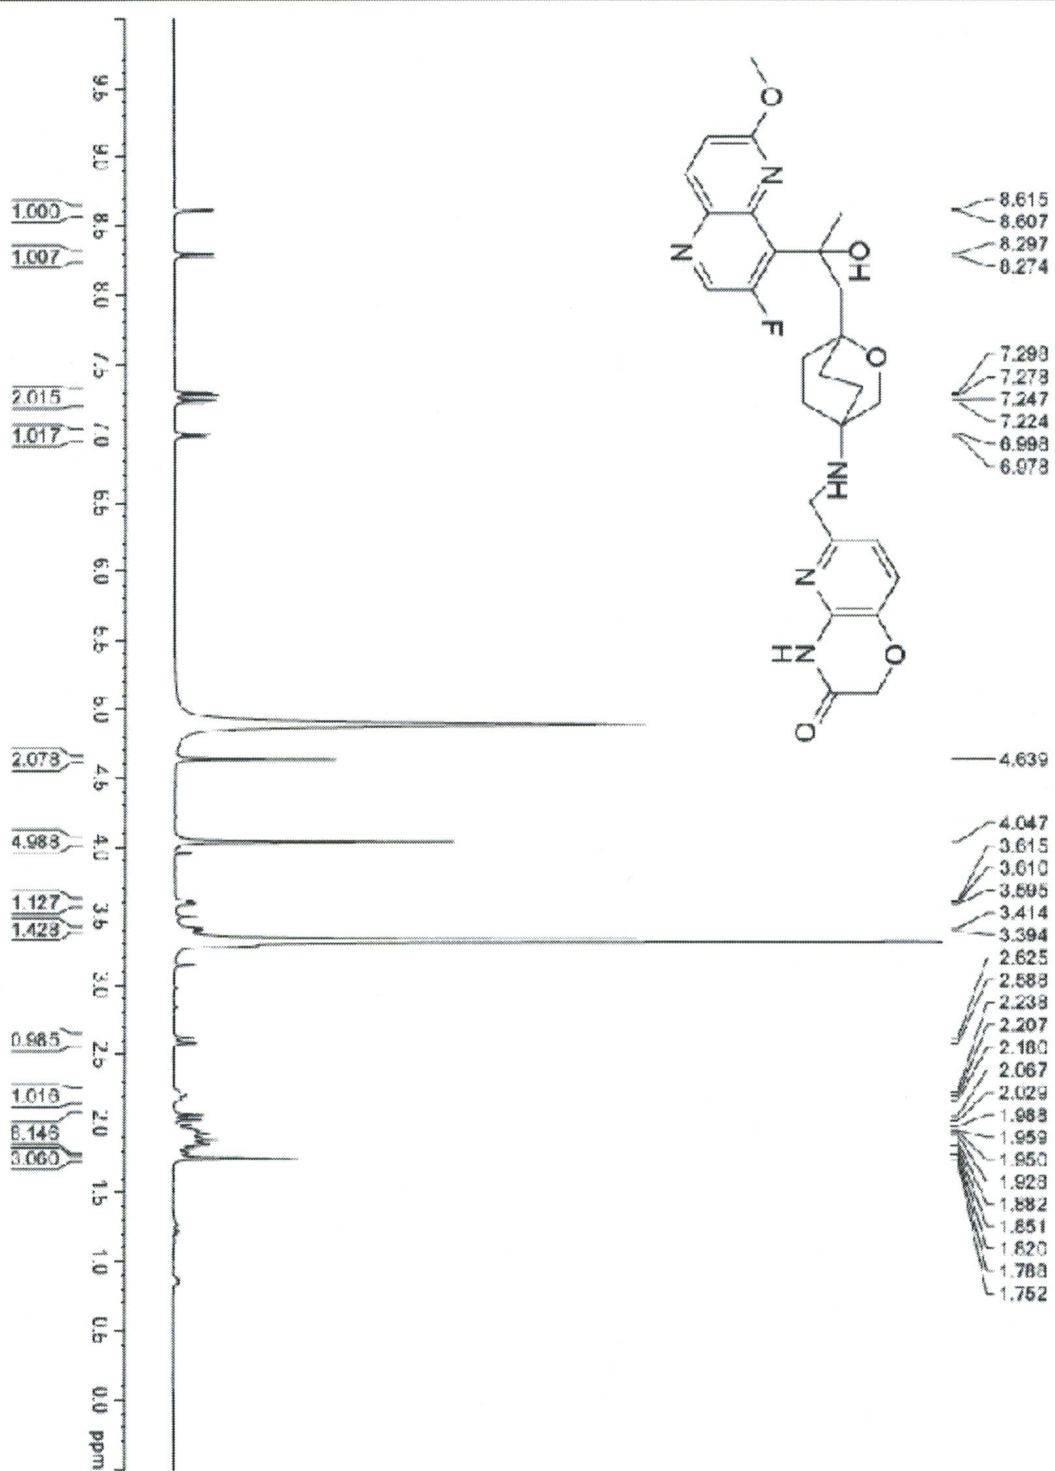

(±)-20 <sup>1</sup>H-NMR Chart

# Compound (±)-21

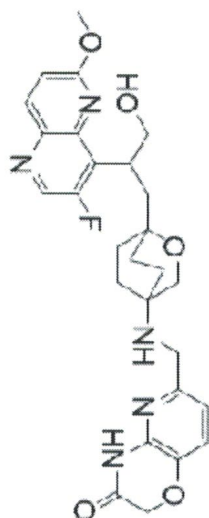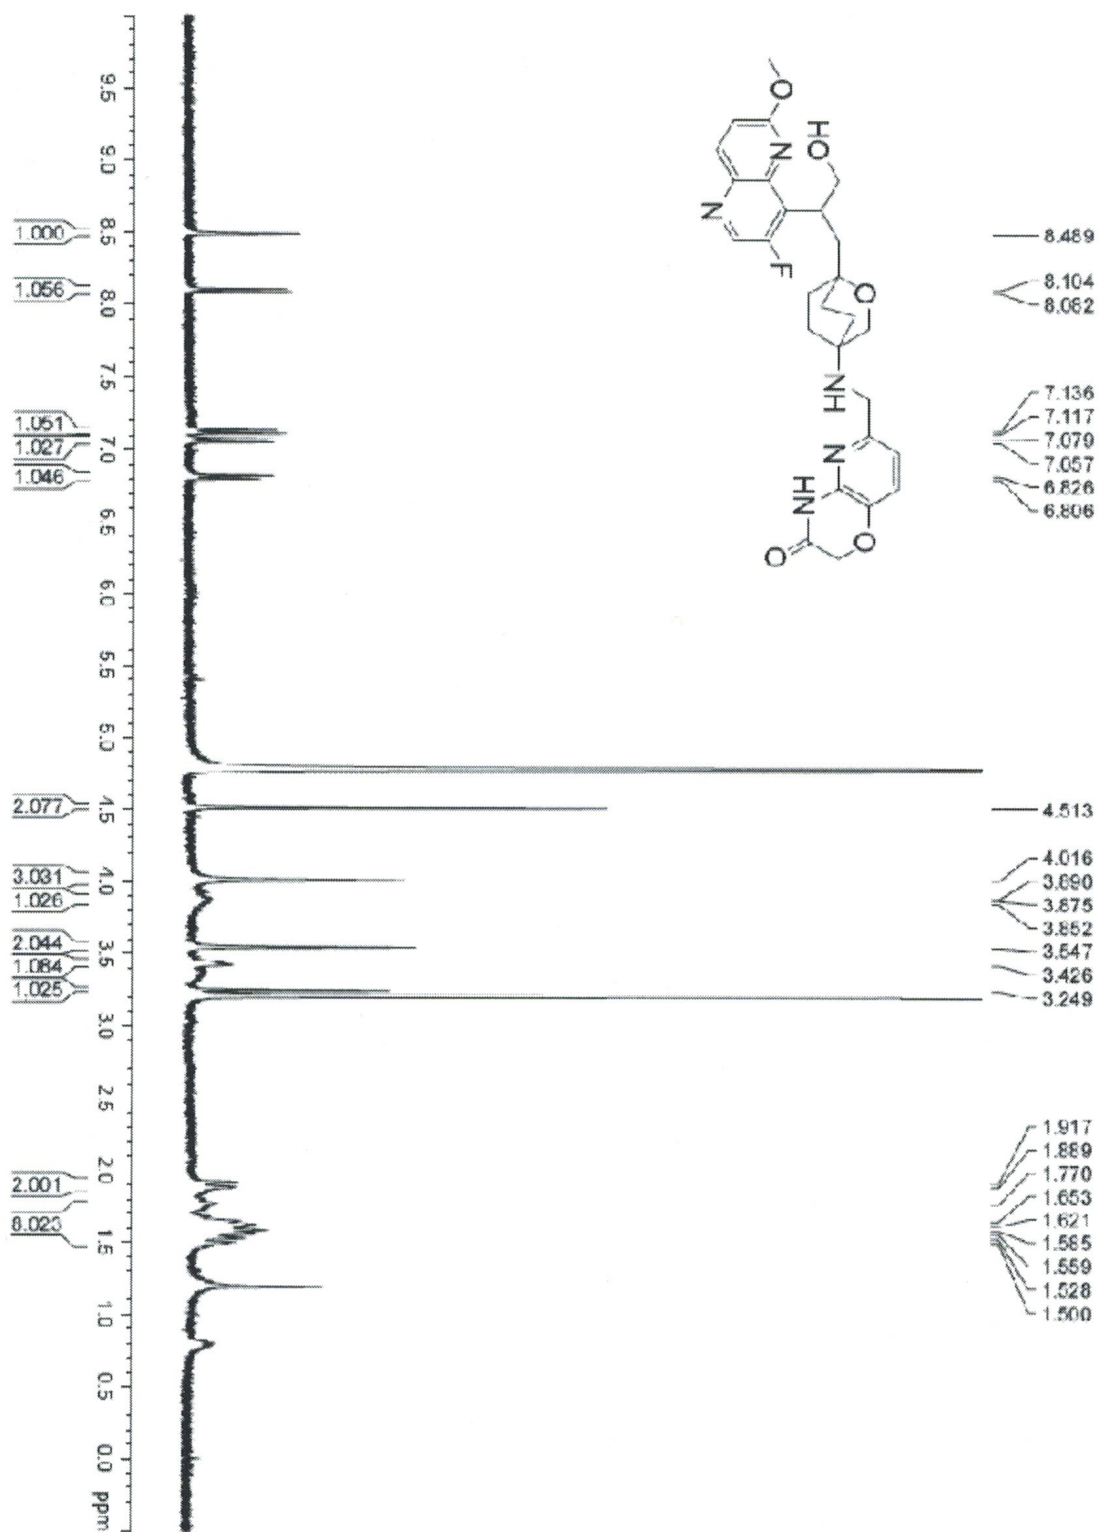

(±)-21 <sup>1</sup>H-NMR Chart



# Compound (±)-22

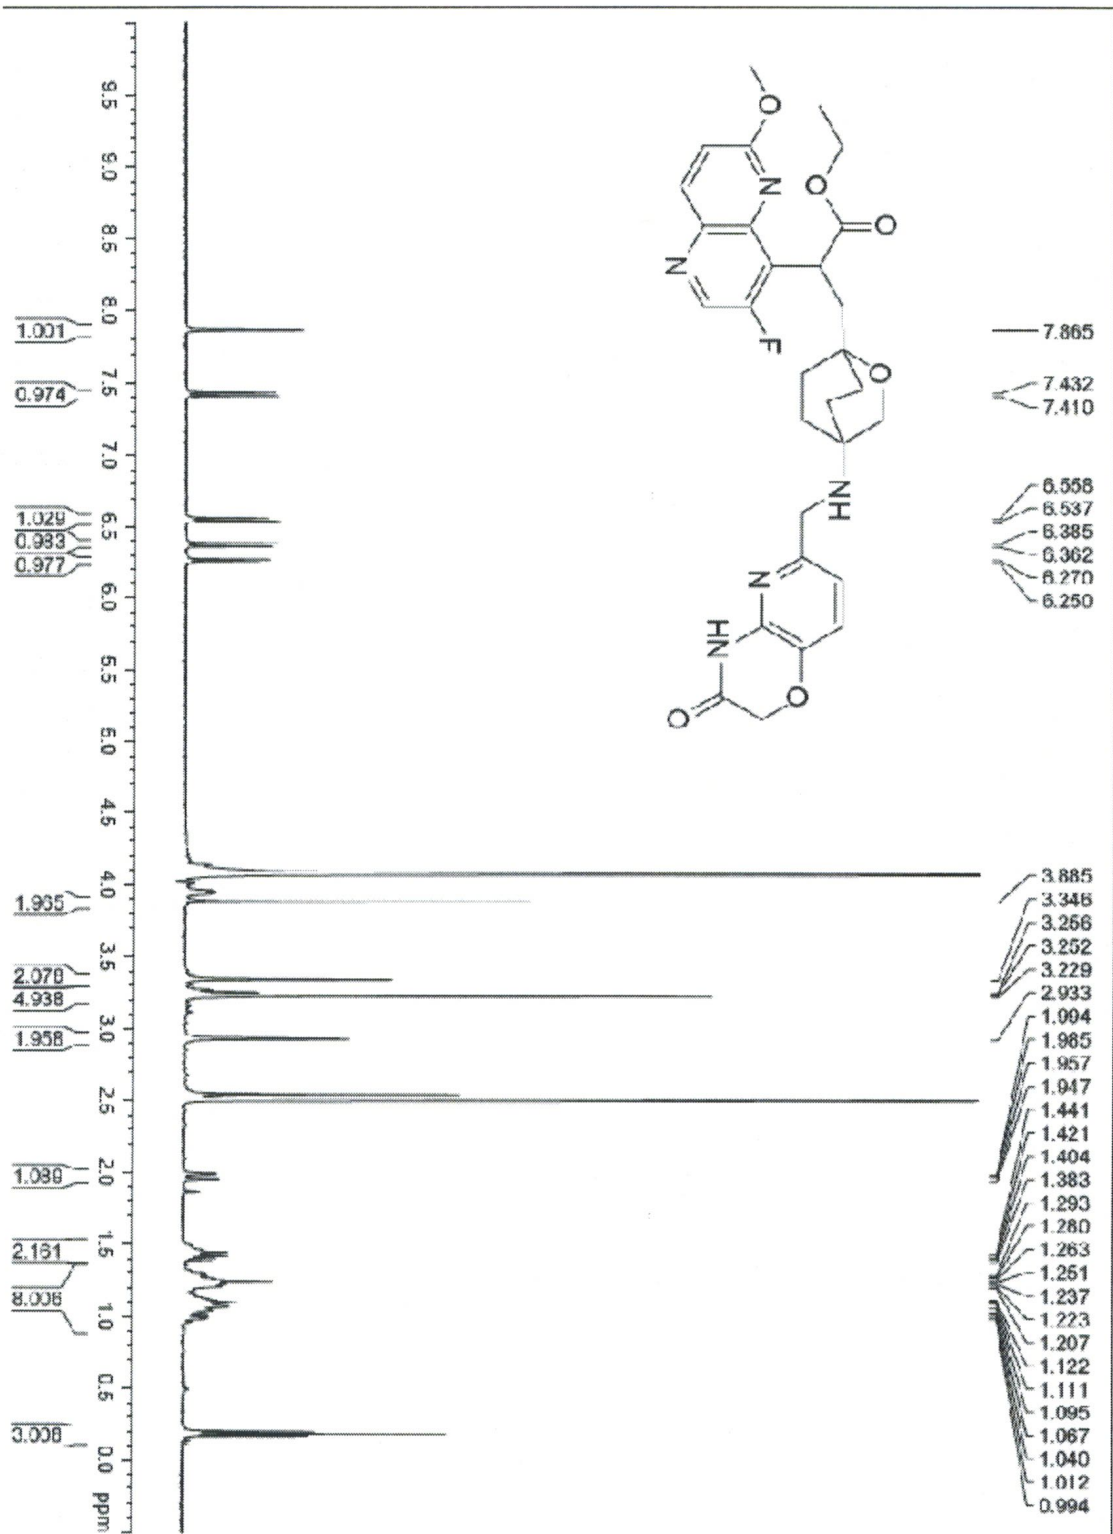

(±)-22 <sup>1</sup>H-NMR Chart

# Compound (I)-23

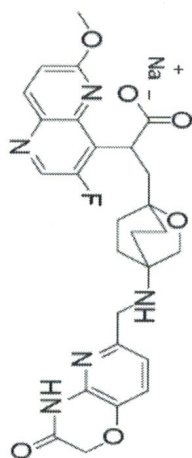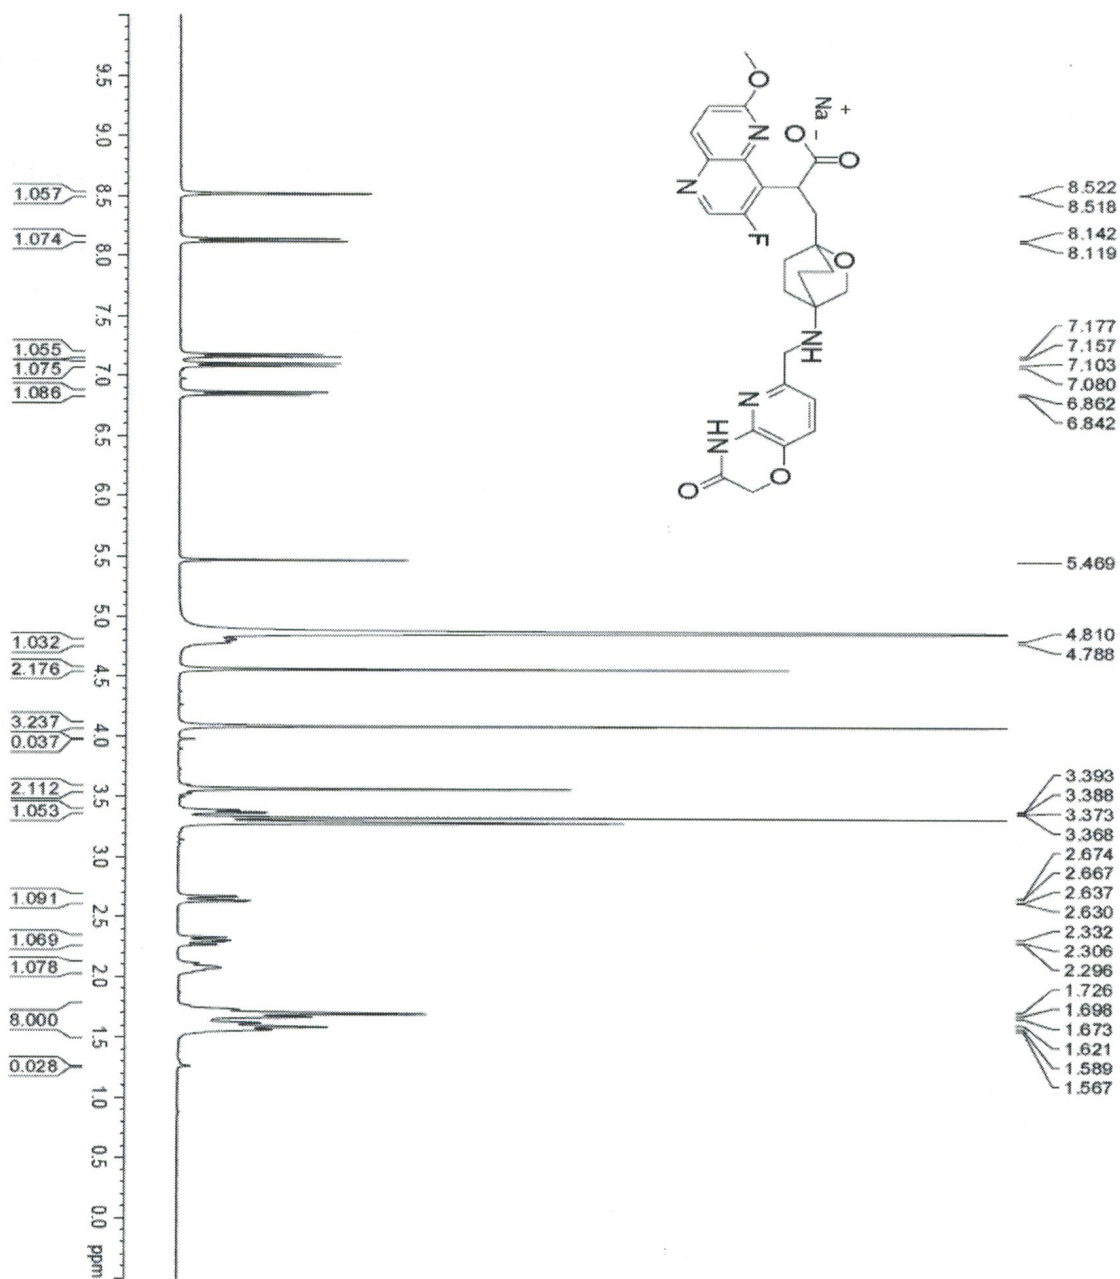

(±)-23 <sup>1</sup>H-NMR Chart

Compound 14-3-24

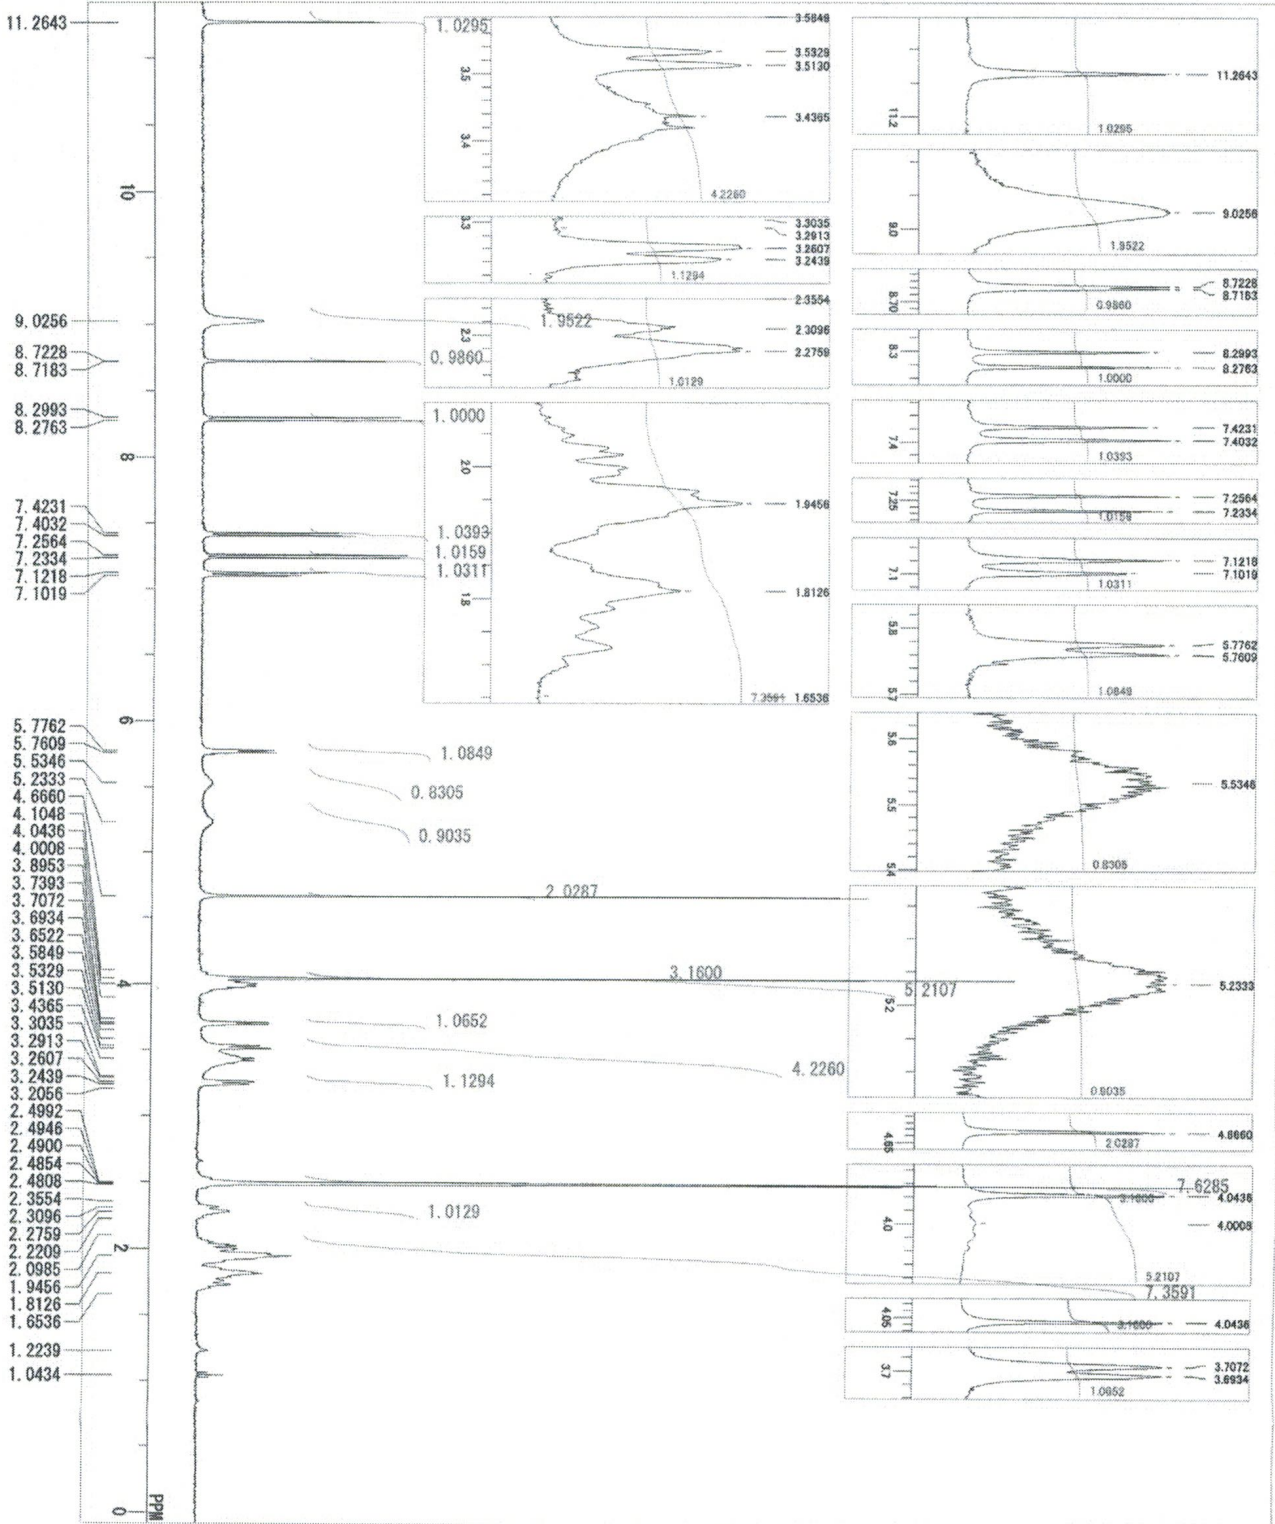

DE FILE F:\XONMR\4-1\14-3-24\14-3-24-2  
 COUNT 144-3-026-2  
 DATE 07-12-2009 06:47:03  
 DATIN 1H  
 OBNUC 1H  
 EXMOD single pulse ex2  
 OBSF 389.78 MHz  
 OBSF 4.18 kHz  
 PULPROG 26214  
 FREQ 16025.40 Hz  
 SCANS 64  
 ACQTIME 1.6358 sec  
 PD 5.0000 sec  
 PULPROG 6.13 usec  
 T1 24.5 c  
 CTMP 24.5 c  
 SLVNT DMSO  
 EXREF 2.49 ppm  
 RGAIN 0.12 Hz  
 40

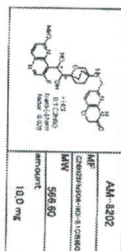

09112107  
 4717403



Compound (+)-24

144-3-025-2

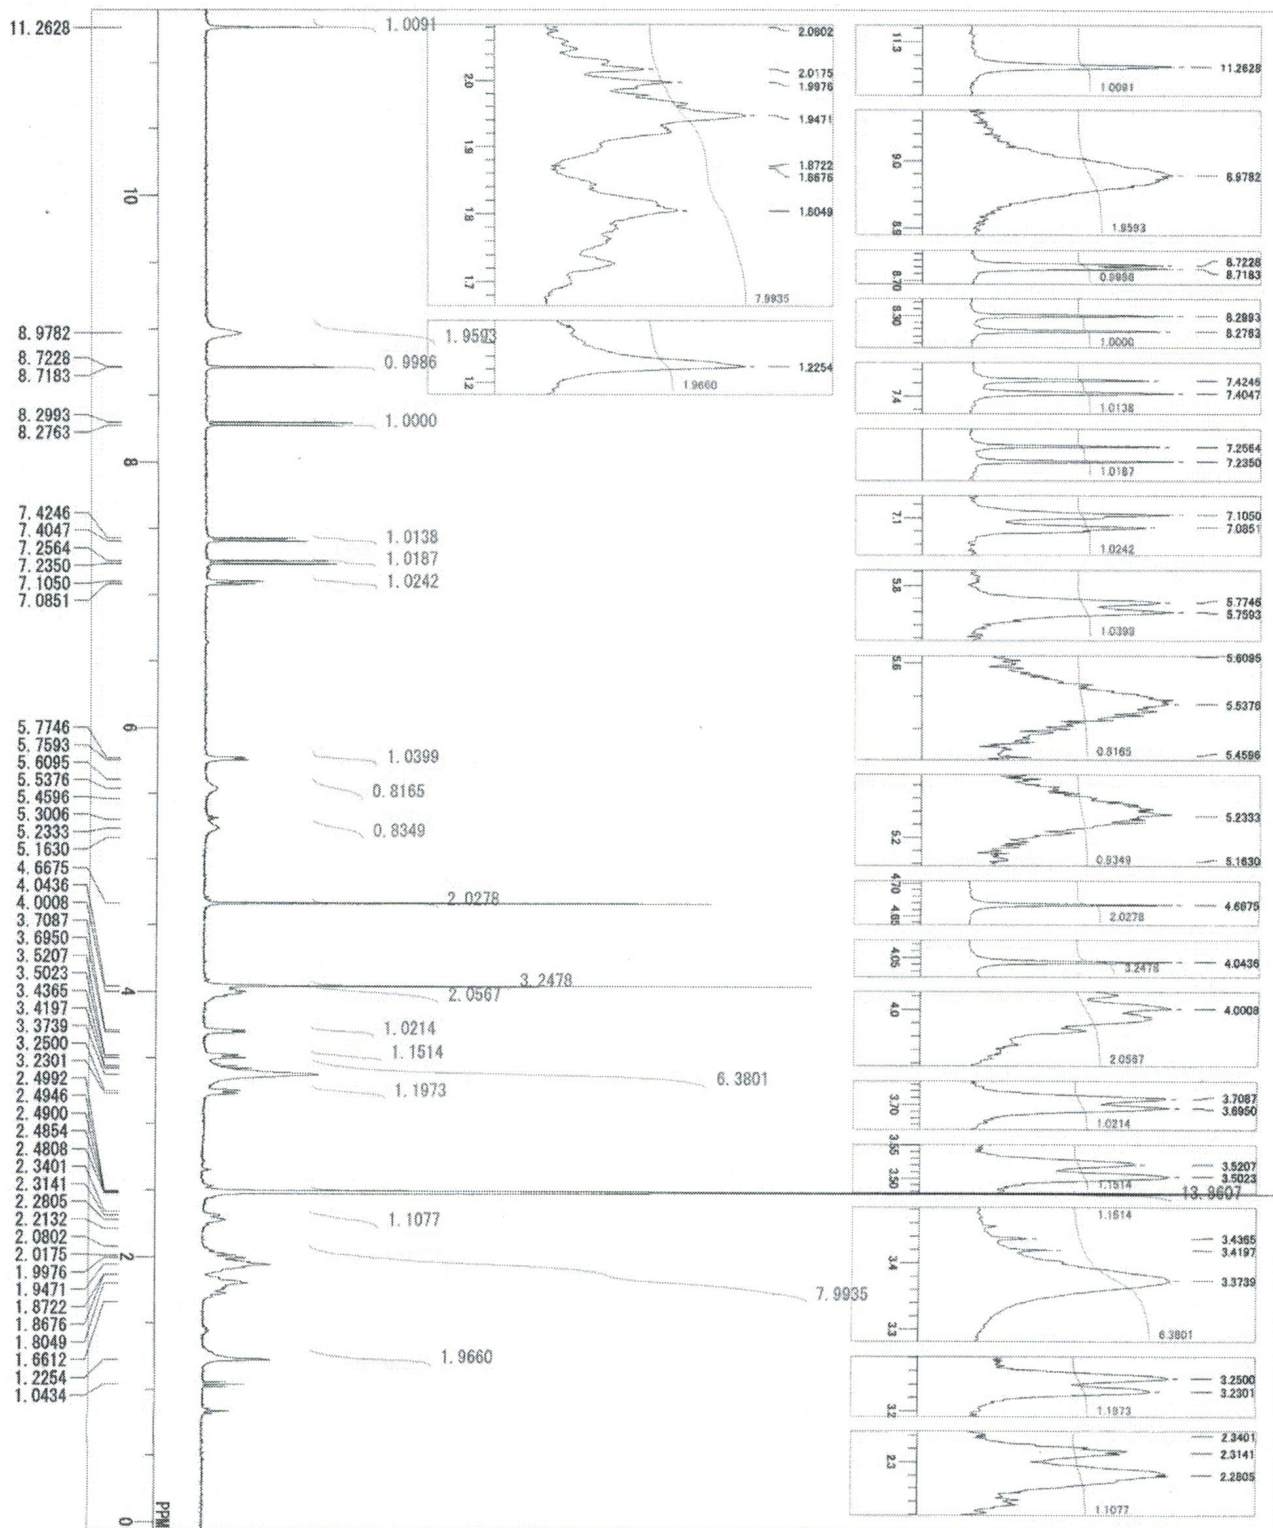

FILE F:\NMR\子ヤ-ト\竹内Takachi.  
 144-3-025-2  
 07-12-2009 06:33:11  
 1H  
 EXMOD Single Pulse, ex2  
 OBSFQ 389.18 MHz  
 OBSF 4.19 kHz  
 POINT 26214  
 FREQU 16025.40 Hz  
 SCANS 64  
 ACQTM 1.6358 sec  
 PD 5.0000 sec  
 PRT 6.13 usec  
 1H  
 T1 24.3 s  
 DMSO  
 CTMP 2.49 ppm  
 SLVT 0.12 Hz  
 EXREF 40  
 RGAIN

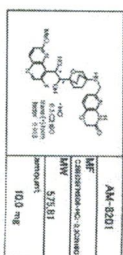

09/12/07  
 476503

Compound 14-3-25

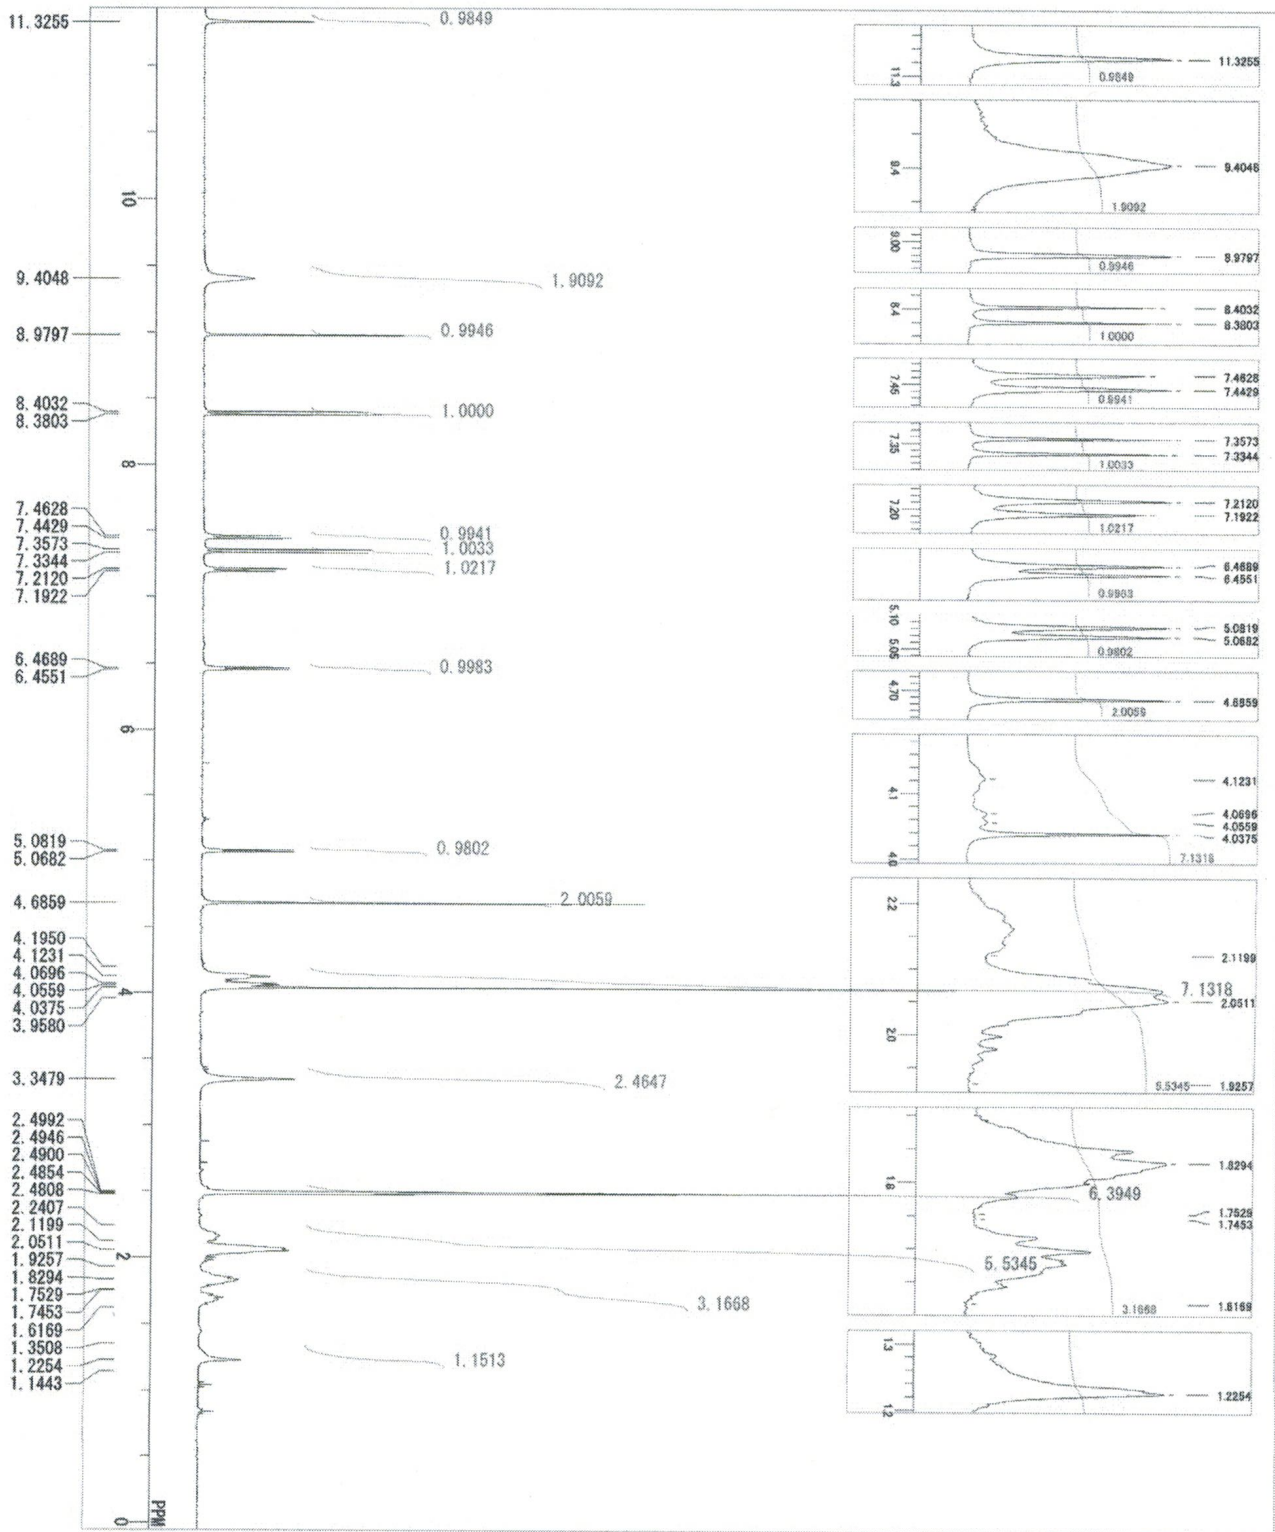

FILE: 14-3-036  
 NAME: 14-3-036  
 DATE: 15-12-2009 10:05:27  
 INSTR: spect  
 PULPROG: zgpg30  
 EXPRNO: 389.78 MHz  
 OBSFREQ: 4.19 MHz  
 POINT1: 26214  
 FREQ1: 16025.40 Hz  
 SCANS: 64  
 AQT: 1.6358 sec  
 PD: 5.0000 sec  
 PRT: 6.13 usec  
 INOC: 24.7 °C  
 CTMP: DMSO  
 SLVIT: 2.49 ppm  
 EXREF: 0.12 Hz  
 RGAIN: 40

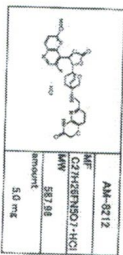

09112115  
47119503



Compound (+)-25

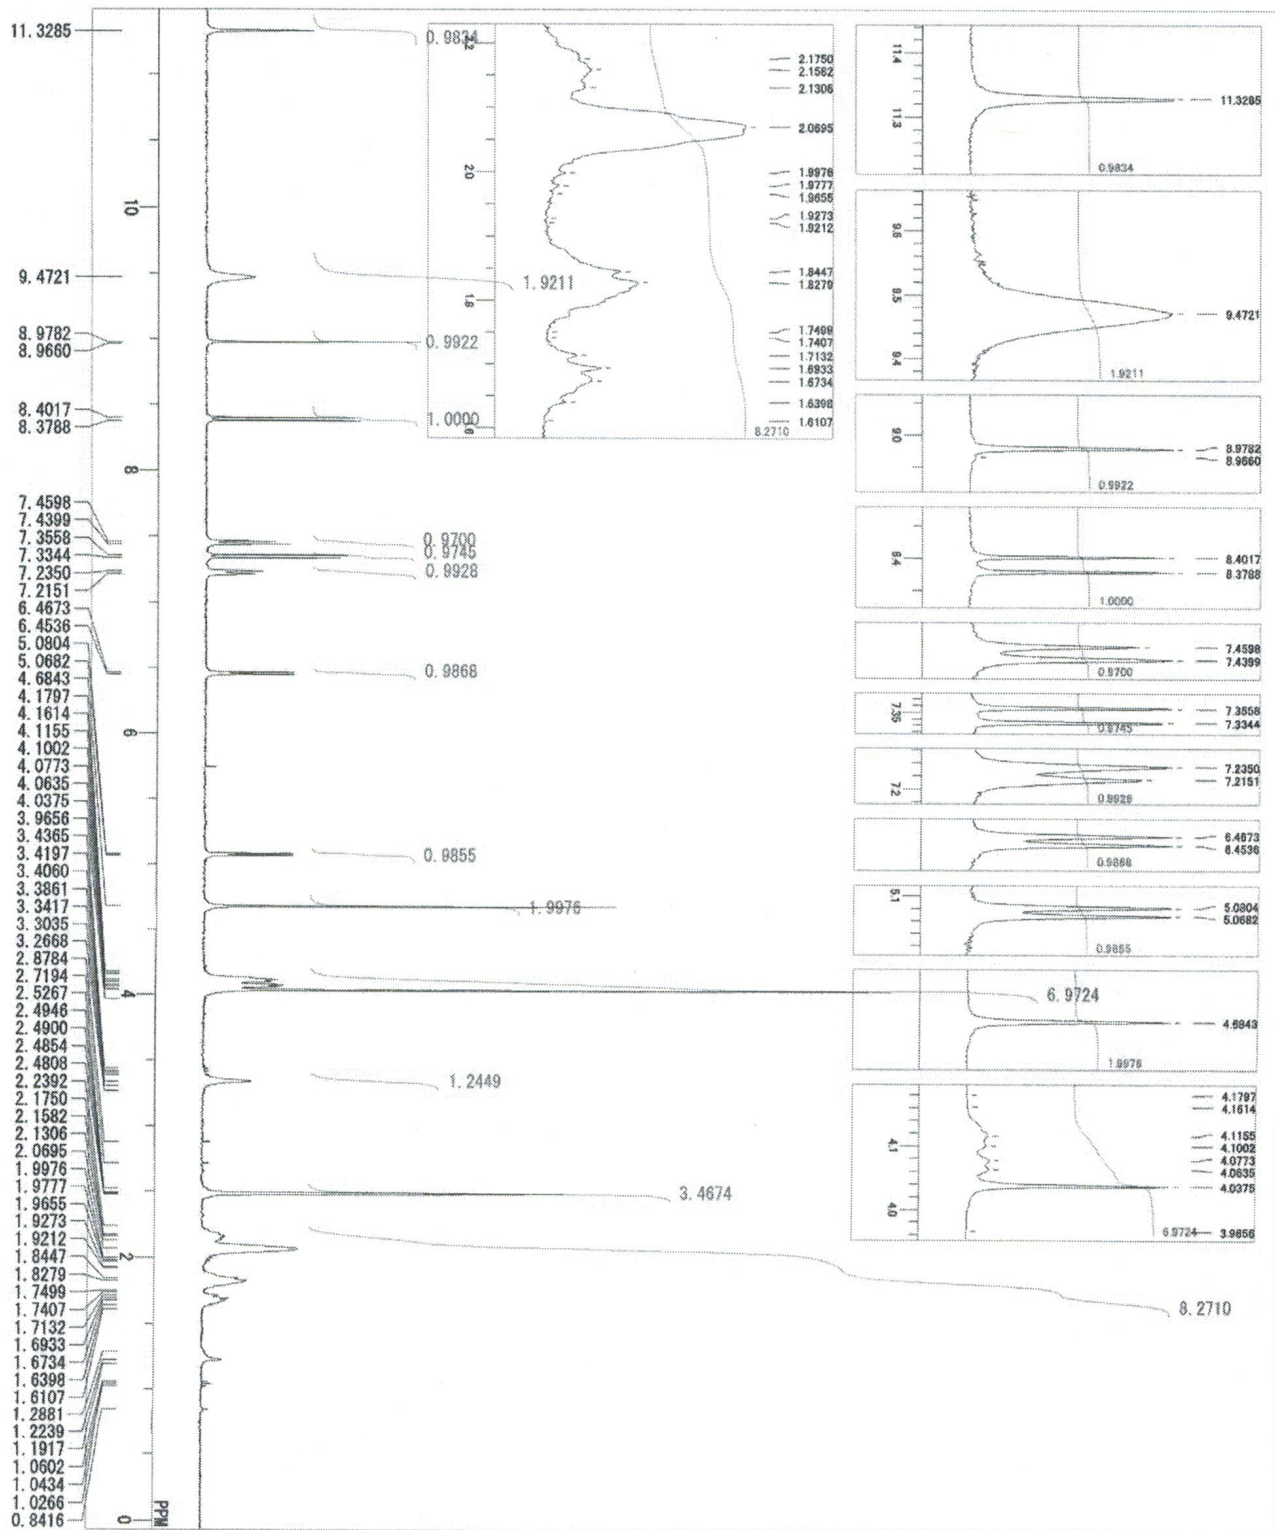

DE FILE F:\XONMR-7-V-1\44-3-040-2  
 COUNT 144-3-040-2  
 DATE 24-12-2009 11:11:31  
 NAME 144-3-040-2  
 EXMOD sing le-pul se. ex2  
 OBSFREQ 399.78 MHz  
 OBSSET 4.19 KHz  
 OBSF IN 7.29 KHz  
 POINT 26214  
 FREQ 16025.40 Hz  
 SCANS 16  
 ACQTM 1.6358 sec  
 PD 5.000 sec  
 FWH 6.13 usec  
 T1 24.40  
 T1NUC 1H  
 T1REF DMSO  
 T1REF 2.49 ppm  
 EXREF 0.12 Hz  
 RGAIN 40

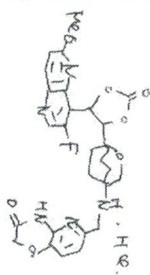

(+)-form

09/12/24  
47m303
